# Supplementary material
Source: PubMed Central journal article supplement (PMC545447)
Supplement: nar_32_22_6627__2.pdf [file nar_32_22_6627__2.pdf]

**Supplementary Table 1.** A list of reported Human, Mouse and Rat ER $\alpha$  target genes<sup>a</sup>

| Gene Symbol        | UniGene ID | Start <sup>b</sup> | End <sup>b</sup> | ERE Sequence    | Ref    |
|--------------------|------------|--------------------|------------------|-----------------|--------|
| <b>Human Genes</b> |            |                    |                  |                 |        |
| ABCG2              | Hs.194720  | -195               | -171             | acggcagggTGACCc | 1      |
| AGT                | Hs.19383   | 102                | 116              | aGGGCAtcgTGACCc | 2      |
| BCL2               | Hs.79241   | 195                | 209              | cGGTCGccaGGACCt | 3,39*  |
| BRCA1              | Hs.194143  | 2022               | 2036             | tGGTCAggcTGGTcT | 4      |
| C3 1               | Hs.284394  | -227               | -215             | aGGTGGcccTGACCc | 5      |
| C3 2               | Hs.284394  | 32                 | 46               | cTGTCcctcTGACCc | 5      |
| CHAT               | Hs.302002  | 508                | 522              | aGGCTAcgaTGACGt | 6      |
| COMT 1             | Hs.240013  | -259               | -245             | cagggagtgTGACCc | 7      |
| COMT 2             | Hs.240013  | -478               | -464             | gagcatgggTGACCc | 7      |
| COX7A2             | Hs.423404  | 452                | 466              | gGGTCAaggTGACCc | 8      |
| CTSD               | Hs.343475  | -270               | -256             | gGGCCGggcTGACCc | 9,40*  |
| CYP1B1             | Hs.154654  | -63                | -49              | aGGTCGcgcTGCCcT | 10     |
| EBAG9              | Hs.9222    | 6                  | 20               | gGGTCAgggTGACCt | 8      |
| EFEMP1             | Hs.76224   | -272               | -258             | aTGTCaAcgTGTCCt | 11     |
| F12                | Hs.1321    | -30                | -16              | aGGGCagctTGACCc | 12     |
| FOS                | Hs.25647   | 90                 | 101              | cCGGCagcgTGACCc | 13,41* |
| HRAS               | Hs.37003   | 1716               | 1730             | agagtgcgcTGACCc | 14     |
| HOXA10             | Hs.110637  | -319               | -307             | gGGTCCcttAGAAGg | 15     |
| LCN2               | Hs.204238  | -823               | -809             | tGGTCTcagTGACCt | 16     |
| LTF                | Hs.437457  | -363               | -349             | aGGTCAaggCGATcT | 17     |
| NQO1               | Hs.406515  | -446               | -432             | gAGTCActgTGACTg | 18     |
| OVGP1              | Hs.1154    | -170               | -156             | gGGTCActgTGACTc | 19     |
| OXT                | Hs.113216  | -165               | -151             | cGGTGAcctTGACCc | 20     |
| PELP1 1            | Hs.409251  | -591               | -577             | acggcagggTGACCc | 21     |
| PELP1 2            | Hs.409251  | -1021              | -1007            | catccaccaTGACCt | 21     |
| PGR 1              | Hs.2905    | 553                | 567              | gGCAGGagcTGACCc | 22     |

|                    |           |       |       |                  |           |
|--------------------|-----------|-------|-------|------------------|-----------|
| PGR 2              | Hs.2905   | 1155  | 1169  | aGGTCAccaGCTCTt  | 22        |
| PTMA               | Hs.459927 | -765  | -751  | gGCTCTcagTGACCCc | 23        |
| SERPINE1           | Hs.414795 | -427  | -413  | actccacagTGACCt  | 24        |
| SERPINB9           | Hs.104879 | -197  | -183  | gGGGGAcccTGACCt  | 25        |
| TERT               | Hs.439911 | -2687 | -2673 | tGGTCAggcTGATCt  | 26        |
| TFAP2C 1           | Hs.440411 | 120   | 134   | tGGTCAccgTGACCCc | 27        |
| TFAP2C 2           | Hs.440411 | 68    | 82    | cgtgtccagTGACCCc | 27        |
| TFF1               | Hs.350470 | 112   | 126   | aGGTCAcggTGGCCa  | 28        |
| TGFA 1             | Hs.170009 | -214  | -200  | gGGTCAgctGTGCCc  | 29        |
| TGFA 2             | Hs.170009 | -190  | -176  | aGGTGAcggTAGCCg  | 29        |
| VEGF               | Hs.73793  | -1560 | -1546 | tAATCAgacTGACTg  | 30,42,43* |
| <b>Mouse Genes</b> |           |       |       |                  |           |
| Agt                | Mm.285467 | -2379 | -2365 | aGGTCAcctTGACCCc | 31        |
| Chat               | Mm.256716 | -2114 | -2100 | aGGCCApgaTGACAt  | 32        |
| Ltf                | Mm.282359 | -340  | -326  | aGGTCAaggTAACCCc | 17        |
| Ovgp1              | Mm.298812 | -110  | -96   | cGGTCAttgTGACTc  | 33        |
| <b>Rat Genes</b>   |           |       |       |                  |           |
| Avp                | Rn.9976   | -4324 | -4310 | gGGCCAgccTGACCg  | 34        |
| Ckb                | Rn.1472   | -558  | -544  | aGGTCAgaaCACCCt  | 35*       |
| Prl 1              | Rn.9759   | -1568 | -1554 | tTGTCActaTGTCCT  | 36        |
| Prl 2              | Rn.9759   | -1547 | -1533 | aGGTCAtaacgattt  | 36        |
| Oxt 1              | Rn.48915  | -115  | -101  | gGAACAgttTGACCCc | 37        |
| Oxt 2              | Rn.48915  | -160  | -146  | cGGTGAcctTGACCCc | 37        |
| Vegf               | Rn.1923   | 399   | 411   | gGGGCAaagTGACTg  | 38        |

<sup>a</sup>The experimentally verified ERE motifs are referred in the **Supplementary References** 1-43.

<sup>b</sup>The start and end positions are relative to TSS as reported.

The ERE Positional Weight Matrix (ERE\_PWM)

| Pos | <u>1</u> | <u>2</u> | <u>3</u> | <u>4</u> | <u>5</u> | <u>6</u> | <u>7</u> | <u>8</u> | <u>9</u> | <u>10</u> | <u>11</u> | <u>12</u> | <u>13</u> | <u>14</u> | <u>15</u> |
|-----|----------|----------|----------|----------|----------|----------|----------|----------|----------|-----------|-----------|-----------|-----------|-----------|-----------|
| A   | 18       | 8        | 5        | 4        | 1        | 29       | 7        | 7        | 7        | 0         | 1         | 39        | 1         | 1         | 6         |
| C   | 8        | 3        | 3        | 9        | 33       | 4        | 21       | 15       | 14       | 0         | 0         | 1         | 43        | 39        | 18        |
| G   | 13       | 31       | 34       | 9        | 8        | 10       | 11       | 15       | 19       | 4         | 44        | 3         | 0         | 1         | 6         |
| T   | 7        | 4        | 4        | 24       | 4        | 3        | 7        | 9        | 6        | 42        | 1         | 3         | 2         | 5         | 16        |
| Con | N        | G        | G        | T        | C        | A        | N        | N        | N        | T         | G         | A         | C         | C         | N         |

**Sources:** 48 experimentally verified ERE motifs from 40 ER $\alpha$  target genes of Human, Mouse, Rat. The PWM is consistent with PWM developed by O’Lone *et al.* (Ref 11 in main body).

The ERE Positional Weight Matrix (ERE\_PWM\_A) constructed without two genes (bcl-2 and c-fos).

| Pos | <u>1</u> | <u>2</u> | <u>3</u> | <u>4</u> | <u>5</u> | <u>6</u> | <u>7</u> | <u>8</u> | <u>9</u> | <u>10</u> | <u>11</u> | <u>12</u> | <u>13</u> | <u>14</u> | <u>15</u> |
|-----|----------|----------|----------|----------|----------|----------|----------|----------|----------|-----------|-----------|-----------|-----------|-----------|-----------|
| A   | 18       | 8        | 5        | 4        | 1        | 29       | 7        | 7        | 6        | 0         | 1         | 37        | 1         | 1         | 6         |
| C   | 7        | 3        | 3        | 8        | 31       | 4        | 20       | 14       | 13       | 0         | 0         | 1         | 41        | 37        | 17        |
| G   | 12       | 29       | 32       | 9        | 8        | 8        | 10       | 14       | 19       | 3         | 42        | 3         | 0         | 1         | 6         |
| T   | 7        | 4        | 4        | 23       | 4        | 3        | 7        | 9        | 6        | 41        | 1         | 3         | 2         | 5         | 15        |
| Con | N        | G        | G        | T        | C        | A        | N        | N        | N        | T         | G         | A         | C         | C         | N         |

**Sources:** 46 experimentally verified ERE motifs from 38 ER $\alpha$  target genes of Human, Mouse, Rat. The PWM is consistent with PWM developed by O’Lone *et al.* (Ref 11 in main body).

**\*Note:** The genes such as bcl-2 (BCL2, 39) and c-fos (FOS, 40) have also been reported to be involved with an ER $\alpha$ /Sp1 pathway. The other genes such as cathepsin D (CTSD, 41), progesterone receptor (PR, 22), telomerase (TERT, 26), and Ckb (rat, 35) are thought that ER $\alpha$  and SP1 formed a complex in which both bind to ERE half-site and SP1

binding site. Stoner et al. (42) have found that E2 induced VEGF gene expression in ZR-75 cells through ER $\alpha$ /SP1 and ER $\alpha$ /SP3 interacting with a GC rich region in the promoter. However, studies from Taylor's group (30) and Perrot-Appanat's group (43) have identified an imperfect ERE consensus in the VEGF promoter when it was induced by E2 in MCF-7 cell. Two review papers lately published (Reference 11 in the main body of our manuscript, and Gruber et al. in *TRENDS in Endocrinology and Metabolism*, Vol. 15, 2004) have still quoted most of these genes as direct binding which may require an additional transcriptional factor such as Sp1. In either case, we have constructed the ERE\_PWM\_A after removing 2 ERE consensus from 2 genes (bcl-2 and c-fos) and found there is no effect to the PWM and therefore there is no effect to the CART model. That is because our PWM used a core region from positions 10 to 14 which represents a half site of ERE (TGACC) instead of a perfect ERE consensus (GGTCAnnnTGACC). We also analyzed the frequency of Sp1 binding sites which co-exists with ERE within the 455 bases promoter regions for three data sets (experimentally confirmed ER $\alpha$  targets, ChIP-on-chip data and OMGProm data set). The results and the **Table 3** were updated with new statistical data on a basis of new PWM and some explanation is in the section of Discussion.

## Supplementary References

1. Rachel Ee,P.L., Kamalakaran,S., Tonetti,D., He,X., Ross,D.D. and Beck,W.T. (2004) Identification of a novel estrogen response element in the breast cancer resistance protein (ABCG2) gene. *Cancer Res.*, **64**, 1247-1251.
2. Zhao,Y.Y., Zhou,J., Narayanan,C.S., Cui,Y. and Kumar,A. (1999) Role of C/A polymorphism at -20 on the expression of human angiotensinogen gene. *Hypertension*, **33**, 108-115.
3. Perillo,B., Sasso,A., Abbondanza,C. and Palumbo,G. (2000) 17 $\beta$ -estadiol inhibits apoptosis in MCF7 cells, inducing bcl-2 expression via two estrogen-responsive elements present in the coding sequences. *Mol. Cell. Biol.*, **20**, 2890-2901.
4. Xu,C.F., Chambers,J.A. and Solomon,E. (1997) Complex regulation of the BRCA1 gene. *J. Biol. Chem.*, **272**, 20994-20997.
5. Fan,J.D., Wagner,B.L. and McDonnell,D.P. (1996) Identification of the sequences within the human complement 3 promoter required for estrogen responsiveness provides insight into the mechanism of tamoxifen mixed agonist activity. *Mol. Endocrinol.*, **10**, 1605-1616.
6. Hyder,S.M., Chiappetta,C., Stancel,G.M. (1999) Interaction of human estrogen receptors alpha and beta with the same naturally occurring estrogen response elements. *Biochem Pharmacol.*, **57**, 597-601.
7. Xie,T., Ho,S. and Ramsden D. (1999) Characterization and implications of estrogenic down-regulation of human catechol-o-methyltransferase gene transcription. *Mol. Pharm.*, **56**, 31-38.
8. Watanabe,T., Inoue,S., Hiroi,H., Orimo,A., Kawashima,H. and Muramatsu,M. (1998) Isolation of estrogen-responsive genes with a CpG island library. *Mol. Cell. Biol.*, **18**, 442-449.
9. Augereau,P., Miralles,F., Cavailles,V., Gaudelet,C., Parker,M. and Rochefort,H. (1994) Characterization of the proximal estrogen-responsive element of human cathepsin D gene. *Mol. Endocrinol.*, **8**, 693-703.
10. Tsuchiya,Y., Nakajima,M., Kyo,S., Inoue,M. and Yokoi,T. (2004) Human CYP1B1 is regulated by estradiol via estrogen receptor. *Cancer Res.*, **64**, 3119-3125.

11. Blackburn,J., Tarttelin,E.E., Gregory-Evans,C.Y., Moosajee,M. and Gregory-Evans,K. (2003) Transcriptional regulation and expression of the dominant drusen gene FBLN3 (EFEMP1) in mammalian retina. *IOVS*, **44**, 4613-4621.
12. Citarella,F., Misiti,S., Felici,A., Aiuti,A., La Porta,C. and Fantoni,A. (1993) The 5' sequence of human factor XII gene contains transcription regulatory elements typical of liver specific, estrogen-modulated genes. *Biochim Biophys Acta.*, **1172**, 197-199.
13. Weisz,A. and Rosales,R. (1990) Identification of an estrogen response element upstream of the human c-fos gene that binds the estrogen receptor and the AP-1 transcription factor. *Nucleic Acids Research*, **18**, 5097-5106.
14. Pethe,V. and Shekhar,P.V. (1999) Estrogen inducibility of c-Ha-ras transcription in breast cancer cells. Identification of functional estrogen-responsive transcriptional regulatory elements in exon 1/intron 1 of the c-Ha-ras gene. *J. Biol. Chem.*, **274**, 30969-30978.
15. Akbas,G.E., Song,J. and Taylor,H.S. (2004) A HOXA10 estrogen response element (ERE) is differentially regulated by 17 beta-estradiol and diethylstilbestrol (DES). *J. Mol. Biol.*, **340**, 1013-1023.
16. Seth,P., Porter,D., Lahti-Domenici,J., Geng,Y., Richardson,A. and Polyak,K. (2002) Cellular and molecular targets of estrogen in normal human breast tissue. *Cancer Res.*, **62**, 4540-4544.
17. Teng,C.T., Liu,Y., Yang,N., Walmer,D. and Panella,T. (1992) Differential molecular mechanism of estrogen action that regulates lactoferrin gene in human and mouse. *Mol Endocrinol.*, **6**, 1969-1981.
18. Montano,M.M., Wittmann,B.M. and Bianco,N.R. (2000) Identification and characterization of a novel factor that regulates quinone reductase gene transcriptional activity. *J Biol Chem.*, **275**, 34306-34313.
19. Agarwal,A., Yeung,W.B. and Lee,K. (2002) Cloning and characterization of the human oviduct-specific glycoprotein gene promoter. *Molecular Human Reproduction*, **8**, 167-175.
20. Richard,S. and Zingg,H.H. (1990) The human oxytocin gene promoter is regulated by estrogens. *J. Bio. Chem.*, **265**, 6098-6103.

21. Mishra,S.K., Balasenthil,S., Nguyen,D. and Vadlamudi,R.K. (2004) Cloning and functional characterization of PELP1/MNAR promoter. *Gene*, **330**, 115-122.
22. Cormier,E.M., Wolf, M.F., Jordan,V.C. (1989) Decrease in estradiol-stimulated progesterone receptor production in MCF7 cells by epidermal growth factor and possible clinical implication for paracrine-regulated breast cancer growth. *Cancer Res.*, **49**, 576-80.
23. Martini,P. and Katzenellenbogen,B. (2001) Regulation of prothymosin a gene expression by estrogen in estrogen receptor-containing breast cancer cells via upstream half-palindromic estrogen response element motifs. *Endocrinology*, **142**, 3493-3501.
24. Krieg,A.J., Krieg,S.A., Ahn,B.S. and Shapiro,D.J. (2004) Interplay between estrogen response element sequence and ligands controls in vivo binding of estrogen receptor to regulated genes. *J Biol Chem.*, **279**, 5025-5034.
25. Smith,L.H., Coats,S.R., Qin,H., Petrie,M.S., Covington,J.W., Su,M., Eren,M., and Vaughan,D.E. (2004) Differential and opposing regulation of PAI-1 promoter activity by estrogen receptor alpha and estrogen receptor beta in endothelial cells. *Circ Res.*, **95**, 269-75.
26. Kyo,S., Takakura,M., Kanaya,T., Zhuo,W., Fujimoto,K., Nishio,Y., Orimo,A. and Inoue,M. (1999) Estrogen activates telomerase. *Cancer Research*, **59**, 5917-5921.
27. Orso,F., Cottone,E., Hasleton,M.D., Ibbitt,J.C., Sismondi,P., Hurst,H.C. and De Bortoli, M. (2004) Activator protein-2gamma (AP-2gamma) expression is specifically induced by oestrogens through binding of the oestrogen receptor to a canonical element within the 5'-untranslated region. *Biochem J.*, **377** (Pt 2), 429-38.
28. Kim,J., Petz,L.N., Ziegler,Y.S., Wood,J.R., Potthoff,S.J. and Nardulli,A.M. (2000) Regulation of the estrogen-responsive pS2 gene in MCF-7 human breast cancer cells. *J. Ster. Bio. Mol. Biol.*, **74**, 157-168.
29. El-Ashry,D., Chrysogelos,S.A., Lippman,M.E. and Kern,F.G. (1996) Estrogen induction of TGF- $\alpha$  is mediated by an estrogen response element comprised of two imperfect palindromes. *J. Steroid Biochem. Molec. Biol.*, **59**, 261-269.
30. Mueller,M.D., Vigne,J.L., Minchenko,A., Lebovic,D.I., Leitman,D.C. and Taylor,R.N. (2000) Regulation of vascular endothelial growth factor (VEGF) gene

transcription by estrogen receptors alpha and beta. *Proc. Nat. Acad. Sci. USA*, **97**, 10972-10977.

31. Congiu,M., Clouston,W.M., Fernley,R.T. and Richards,R.I. (1992) The function of conserved elements in the promoter of mouse angiotensinogen gene. *Mol. Endocrinol.*, **9**, 19-29.

32. Miller,M.M., Hyder,S.M., Assayag,R., Panarella,S.R., Tousignant,P. and Franklin,K.B. (1999) Estrogen modulates spontaneous alternation and the cholinergic phenotype in the basal forebrain. *Neuroscience.*, **91**,1143-53.

33. Takahashi,K., Sendai,Y., Matsuda,Y., Hoshi,H. And Hiroi,M. (2000) Mouse oviduct-specific glycoprotein gene: genomic organization and structure of the 5'-flanking regulatory region. *Biology of Reproduction*, **62**, 217-226.

34. Shapiro,R.A., Xu,C. and Dorsa,D.M. (2000) Differential transcriptional regulation of rat vasopressin gene expression by estrogen receptor  $\alpha$  and  $\beta$ . *Endocrinology*, **141**, 4050-4064.

35. Wang,F., Samudio,I. and Safe,S. (2002) Transcriptional activation of rat creatine kinas B by  $17\beta$ -estradiol in MCF-7 cells involves an estrogen responsive element and GC-rich sites. *J. Cell. Biochem.*, **84**, 156-172.

36. Anderson,I. and Gorski,J. (2000) Estrogen Receptor  $\alpha$  Interaction with Estrogen Response Element Half-Sites from the Rat Prolactin Gene. *Biochemistry*, **39**, 3842-3847.

37. Burbach,J.P.H., da Silva,S.L., Cox,J.J., Adan,R.A.H., Cooney,A.J., Tsai,M. and Tsai,S.Y. (1994) Repression of estrogen-dependent stimulation of the oxytocin gene by chicken ovalbumin upstream promoter transcription factor I. *J. Biol. Chem.*, **269**, 15046-15053.

38. Hyder,S.M., Nawaz,Z., Chiappetta,C. and Stancel,G.M. (2000) Identification of functional estrogen response elements in the gene coding for the potent angiogenic factor vascular endothelial growth factor. *Cancer Research*, **60**, 3183-3190.

39. Dong,L., Wang,W., Wang,F., Stoner,M., Reed,J.C., Harigai,M., Samudio,I., Kladde,M.P., Vyhldal,C. and Safe,S. (1999) Mechanisms of transcriptional activation of *bcl-2* gene expression by  $17\beta$ -estradiol in breast cancer cells. *J. Biol. Chem.*, **274**, 32099-32107.



40. Duan,R., Porter,W. and Safe,S. (1998) Estrogen-induced c-fos protooncogene expression in MCF-7 human breast cancer cells: role of estrogen receptor Sp1 complex formation. *Endocrinology*, **139**, 1981-1990.
41. Krishnan,V., Wang,X. and Safe,S. (1994) Estrogen receptor-Sp1 complexes mediate estrogen-induced cathepsin D gene expression in MCF-7 human breast cancer cells. *J. Biol. Chem.*, **269**, 15912-15917.
42. Stoner,M., Wormke,M., Saville,B., Samudio,I., Qin,C., Abdelrahim,M. and Safe.S (2004) Estrogen regulation of vascular endothelial growth factor gene expression in ZR-75 breast cancer cells through interaction of estrogen receptor  $\alpha$  and SP proteins. *Oncogene*, **23**, 1052-1063.
43. Buteau-Lozano,H., Ancelin,M., Lardeux,B., Milanini,J. and Perrot-Applanat,M. (2002) Transcriptional regulation of vascular endothelial growth factor by estradiol and tamoxifen in breast cancer cells: a complex interplay between estrogen receptors  $\alpha$  and  $\beta$ . *Cancer Research*, **62**, 4977-4984.
