# Supplementary material
Source: PubMed Central journal article supplement (PMC545447)
Supplement: nar_32_22_6627__3.pdf [file nar_32_22_6627__3.pdf]

**Supplementary Table 2.** A list of ER $\alpha$  targets predicted by CART *model 2* and classified into four categories based on 4 different modules (See Supplementary Figure 2 and Figure 1). The presence or absence of a transcription factor binding site (Columns 3 to 8) within the module (Column 9) is indicated by 1 or 0 respectively.

| UnigenelD | Gene Name | ER | MYOGENIN | USF2 | DBP | AP1 | GATA3 | Module |
|-----------|-----------|----|----------|------|-----|-----|-------|--------|
| Hs.101067 | GCN5L2    | 1  | 1        | 0    | 1   | 0   | 1     | 1      |
| Hs.101474 | MAST2     | 1  | 1        | 0    | 1   | 1   | 1     | 1      |
| Hs.102119 | OPN1SW    | 1  | 1        | 0    | 1   | 0   | 1     | 1      |
| Hs.102928 | FLJ13479  | 1  | 1        | 0    | 1   | 0   | 1     | 1      |
| Hs.103854 | DOK1      | 1  | 1        | 0    | 1   | 0   | 0     | 1      |
| Hs.108689 | SREBF2    | 1  | 1        | 0    | 1   | 1   | 0     | 1      |
| Hs.112282 | SLC30A4   | 1  | 1        | 0    | 1   | 0   | 1     | 1      |
| Hs.118722 | FUT8      | 1  | 1        | 0    | 1   | 1   | 1     | 1      |
| Hs.122575 | EDG4      | 1  | 1        | 0    | 1   | 0   | 0     | 1      |
| Hs.12337  | KDR       | 1  | 1        | 0    | 1   | 0   | 1     | 1      |
| Hs.129055 | ODF2      | 1  | 1        | 0    | 1   | 1   | 0     | 1      |
| Hs.13014  | ARFGAP3   | 1  | 1        | 0    | 1   | 0   | 1     | 1      |
| Hs.13222  | FLJ21963  | 1  | 1        | 0    | 1   | 1   | 0     | 1      |
| Hs.13512  | ZW10      | 1  | 1        | 0    | 1   | 1   | 0     | 1      |
| Hs.149931 | MGC29814  | 1  | 1        | 0    | 1   | 0   | 0     | 1      |
| Hs.150917 | CTNNA2    | 1  | 1        | 0    | 1   | 1   | 0     | 1      |
| Hs.155247 | ALDOC     | 1  | 1        | 0    | 1   | 1   | 1     | 1      |
| Hs.161305 | TACR2     | 1  | 1        | 0    | 1   | 1   | 1     | 1      |
| Hs.162604 | PGS1      | 1  | 1        | 0    | 1   | 1   | 0     | 1      |
| Hs.16529  | TM4SF12   | 1  | 1        | 0    | 1   | 1   | 1     | 1      |
| Hs.165904 | EPN3      | 1  | 1        | 0    | 1   | 0   | 0     | 1      |
| Hs.170737 | UBE1DC1   | 1  | 1        | 0    | 1   | 0   | 0     | 1      |
| Hs.173497 | SEC23B    | 1  | 1        | 0    | 1   | 0   | 1     | 1      |
| Hs.179986 | FLOT1     | 1  | 1        | 0    | 1   | 0   | 1     | 1      |
| Hs.186756 | KIAA1441  | 1  | 1        | 0    | 1   | 0   | 1     | 1      |
| Hs.193717 | IL10      | 1  | 1        | 0    | 1   | 1   | 1     | 1      |
| Hs.200596 | LCMT2     | 1  | 1        | 0    | 1   | 0   | 1     | 1      |
| Hs.203557 | ST7       | 1  | 1        | 0    | 1   | 0   | 0     | 1      |
| Hs.204539 | BNIP2     | 1  | 1        | 0    | 1   | 0   | 1     | 1      |
| Hs.22065  | SPEC1     | 1  | 1        | 0    | 1   | 0   | 1     | 1      |
| Hs.22151  | NLN       | 1  | 1        | 0    | 1   | 0   | 1     | 1      |
| Hs.231029 | MGC14327  | 1  | 1        | 0    | 1   | 0   | 1     | 1      |
| Hs.23241  | FLJ10925  | 1  | 1        | 0    | 1   | 1   | 0     | 1      |
| Hs.235888 | FLJ10560  | 1  | 1        | 0    | 1   | 1   | 1     | 1      |
| Hs.23719  | ENPP2     | 1  | 1        | 0    | 1   | 0   | 1     | 1      |
| Hs.238094 | HspB9     | 1  | 1        | 0    | 1   | 0   | 1     | 1      |
| Hs.241257 | LTBP1     | 1  | 1        | 0    | 1   | 0   | 1     | 1      |
| Hs.241575 | GNPTAG    | 1  | 1        | 0    | 1   | 0   | 0     | 1      |
| Hs.247186 | FBS1      | 1  | 1        | 0    | 1   | 0   | 1     | 1      |
| Hs.247362 | DDAH2     | 1  | 1        | 0    | 1   | 0   | 0     | 1      |
| Hs.248138 | INSRR     | 1  | 1        | 0    | 1   | 0   | 0     | 1      |

|           |               |   |   |   |   |   |   |   |
|-----------|---------------|---|---|---|---|---|---|---|
| Hs.251385 | MRVI1         | 1 | 1 | 0 | 1 | 0 | 1 | 1 |
| Hs.2551   | ADRB2         | 1 | 1 | 0 | 1 | 1 | 1 | 1 |
| Hs.25723  | MTVR1         | 1 | 1 | 0 | 1 | 0 | 1 | 1 |
| Hs.265196 | LOC51693      | 1 | 1 | 0 | 1 | 1 | 0 | 1 |
| Hs.26550  | RXRG          | 1 | 1 | 0 | 1 | 1 | 0 | 1 |
| Hs.267194 | MIS12         | 1 | 1 | 0 | 1 | 0 | 1 | 1 |
| Hs.268713 | SGTB          | 1 | 1 | 0 | 1 | 0 | 1 | 1 |
| Hs.269881 | SNX13         | 1 | 1 | 0 | 1 | 1 | 0 | 1 |
| Hs.2700   | GLRA2         | 1 | 1 | 0 | 1 | 0 | 1 | 1 |
| Hs.274356 | FLJ10547      | 1 | 1 | 0 | 1 | 1 | 1 | 1 |
| Hs.283677 | GTPBP1        | 1 | 1 | 0 | 1 | 1 | 1 | 1 |
| Hs.283816 | CX36          | 1 | 1 | 0 | 1 | 0 | 1 | 1 |
| Hs.285055 | DKFZp564C0469 | 1 | 1 | 0 | 1 | 0 | 1 | 1 |
| Hs.28847  | AD026         | 1 | 1 | 0 | 1 | 0 | 1 | 1 |
| Hs.288931 | PCSK5         | 1 | 1 | 0 | 1 | 0 | 0 | 1 |
| Hs.291079 | HBLD1         | 1 | 1 | 0 | 1 | 0 | 1 | 1 |
| Hs.291431 | D13S106E      | 1 | 1 | 0 | 1 | 0 | 1 | 1 |
| Hs.293798 | ZNF436        | 1 | 1 | 0 | 1 | 0 | 0 | 1 |
| Hs.29595  | JM4           | 1 | 1 | 0 | 1 | 0 | 1 | 1 |
| Hs.296323 | SGK           | 1 | 1 | 0 | 1 | 1 | 1 | 1 |
| Hs.30751  | LOC55924      | 1 | 1 | 0 | 1 | 1 | 0 | 1 |
| Hs.309415 | CAPZA1        | 1 | 1 | 0 | 1 | 0 | 1 | 1 |
| Hs.315369 | AQP4          | 1 | 1 | 0 | 1 | 1 | 0 | 1 |
| Hs.326    | TARBP2        | 1 | 1 | 0 | 1 | 0 | 1 | 1 |
| Hs.334475 | FLJ10634      | 1 | 1 | 0 | 1 | 0 | 1 | 1 |
| Hs.334702 | LOXL3         | 1 | 1 | 0 | 1 | 0 | 0 | 1 |
| Hs.337008 | BCCIP         | 1 | 1 | 0 | 1 | 1 | 1 | 1 |
| Hs.34780  | DCX           | 1 | 1 | 0 | 1 | 1 | 1 | 1 |
| Hs.348308 | C1orf2        | 1 | 1 | 0 | 1 | 1 | 1 | 1 |
| Hs.369068 | DNCLI2        | 1 | 1 | 0 | 1 | 1 | 1 | 1 |
| Hs.372800 | ARHGEF6       | 1 | 1 | 0 | 1 | 1 | 1 | 1 |
| Hs.381267 | HOXC12        | 1 | 1 | 0 | 1 | 0 | 1 | 1 |
| Hs.386078 | MYLK          | 1 | 1 | 0 | 1 | 1 | 0 | 1 |
| Hs.386748 | MS4A2         | 1 | 1 | 0 | 1 | 0 | 0 | 1 |
| Hs.387753 | DKFZp762A217  | 1 | 1 | 0 | 1 | 0 | 1 | 1 |
| Hs.388220 | CDADC1        | 1 | 1 | 0 | 1 | 1 | 0 | 1 |
| Hs.400295 | RPL30         | 1 | 1 | 0 | 1 | 0 | 1 | 1 |
| Hs.402773 | PTPN7         | 1 | 1 | 0 | 1 | 0 | 0 | 1 |
| Hs.406293 | NTRK1         | 1 | 1 | 0 | 1 | 0 | 0 | 1 |
| Hs.406507 | SPRY4         | 1 | 1 | 0 | 1 | 1 | 1 | 1 |
| Hs.407132 | TNNT2         | 1 | 1 | 0 | 1 | 0 | 1 | 1 |
| Hs.408312 | TP53          | 1 | 1 | 0 | 1 | 0 | 1 | 1 |
| Hs.409798 | SGCE          | 1 | 1 | 0 | 1 | 1 | 1 | 1 |
| Hs.4113   | AHCYL1        | 1 | 1 | 0 | 1 | 1 | 1 | 1 |
| Hs.414565 | CLIC1         | 1 | 1 | 0 | 1 | 0 | 1 | 1 |
| Hs.415471 | CENTA2        | 1 | 1 | 0 | 1 | 0 | 0 | 1 |
| Hs.418542 | MR-1          | 1 | 1 | 0 | 1 | 1 | 1 | 1 |

|           |           |   |   |   |   |   |   |   |
|-----------|-----------|---|---|---|---|---|---|---|
| Hs.421496 | TGFBI     | 1 | 1 | 0 | 1 | 0 | 0 | 1 |
| Hs.422662 | VRK1      | 1 | 1 | 0 | 1 | 1 | 1 | 1 |
| Hs.422986 | ANXA4     | 1 | 1 | 0 | 1 | 0 | 1 | 1 |
| Hs.425123 | MGC34713  | 1 | 1 | 0 | 1 | 0 | 1 | 1 |
| Hs.433222 | NPC2      | 1 | 1 | 0 | 1 | 0 | 1 | 1 |
| Hs.435112 | CACNA2D3  | 1 | 1 | 0 | 1 | 0 | 1 | 1 |
| Hs.435169 | TCEB1     | 1 | 1 | 0 | 1 | 0 | 1 | 1 |
| Hs.436204 | ZNF289    | 1 | 1 | 0 | 1 | 0 | 1 | 1 |
| Hs.436407 | ASC1p100  | 1 | 1 | 0 | 1 | 0 | 0 | 1 |
| Hs.437241 | ATP10D    | 1 | 1 | 0 | 1 | 1 | 1 | 1 |
| Hs.437460 | FLJ10385  | 1 | 1 | 0 | 1 | 0 | 1 | 1 |
| Hs.437495 | PSMF1     | 1 | 1 | 0 | 1 | 1 | 0 | 1 |
| Hs.437567 | COL19A1   | 1 | 1 | 0 | 1 | 0 | 1 | 1 |
| Hs.440332 | ERF       | 1 | 1 | 0 | 1 | 0 | 1 | 1 |
| Hs.443134 | GBA2      | 1 | 1 | 0 | 1 | 0 | 1 | 1 |
| Hs.443310 | FLJ13941  | 1 | 1 | 0 | 1 | 0 | 0 | 1 |
| Hs.446422 | KIAA1337  | 1 | 1 | 0 | 1 | 0 | 1 | 1 |
| Hs.446534 | C9orf10   | 1 | 1 | 0 | 1 | 1 | 0 | 1 |
| Hs.448741 | ATP5E     | 1 | 1 | 0 | 1 | 0 | 1 | 1 |
| Hs.456507 | PKD1-like | 1 | 1 | 0 | 1 | 1 | 1 | 1 |
| Hs.458345 | SRD5A2    | 1 | 1 | 0 | 1 | 1 | 1 | 1 |
| Hs.46295  | EPX       | 1 | 1 | 0 | 1 | 0 | 1 | 1 |
| Hs.47313  | KIAA0258  | 1 | 1 | 0 | 1 | 0 | 1 | 1 |
| Hs.48965  | TMOD2     | 1 | 1 | 0 | 1 | 1 | 1 | 1 |
| Hs.512696 | FLJ12806  | 1 | 1 | 0 | 1 | 0 | 1 | 1 |
| Hs.514451 | SSTR2     | 1 | 1 | 0 | 1 | 1 | 0 | 1 |
| Hs.526364 | NR1       | 1 | 1 | 0 | 1 | 0 | 1 | 1 |
| Hs.53250  | BMPR2     | 1 | 1 | 0 | 1 | 0 | 0 | 1 |
| Hs.53447  | KNSL8     | 1 | 1 | 0 | 1 | 0 | 1 | 1 |
| Hs.55041  | MRPL2     | 1 | 1 | 0 | 1 | 0 | 1 | 1 |
| Hs.56382  | FLJ32384  | 1 | 1 | 0 | 1 | 0 | 1 | 1 |
| Hs.63287  | CA9       | 1 | 1 | 0 | 1 | 1 | 0 | 1 |
| Hs.6540   | FGF13     | 1 | 1 | 0 | 1 | 1 | 1 | 1 |
| Hs.72927  | IL7       | 1 | 1 | 0 | 1 | 0 | 0 | 1 |
| Hs.73739  | HTR7      | 1 | 1 | 0 | 1 | 1 | 1 | 1 |
| Hs.75199  | PPP2R5B   | 1 | 1 | 0 | 1 | 1 | 1 | 1 |
| Hs.75659  | MPV17     | 1 | 1 | 0 | 1 | 0 | 0 | 1 |
| Hs.76095  | IER3      | 1 | 1 | 0 | 1 | 0 | 1 | 1 |
| Hs.76177  | AMBP      | 1 | 1 | 0 | 1 | 0 | 1 | 1 |
| Hs.78454  | MYOC      | 1 | 1 | 0 | 1 | 0 | 0 | 1 |
| Hs.79305  | TM9SF4    | 1 | 1 | 0 | 1 | 0 | 0 | 1 |
| Hs.83347  | AAMP      | 1 | 1 | 0 | 1 | 1 | 1 | 1 |
| Hs.86492  | SMPX      | 1 | 1 | 0 | 1 | 1 | 1 | 1 |
| Hs.8705   | MGC32065  | 1 | 1 | 0 | 1 | 0 | 1 | 1 |
| Hs.88012  | SIT       | 1 | 1 | 0 | 1 | 0 | 0 | 1 |
| Hs.93765  | LHFP      | 1 | 1 | 0 | 1 | 1 | 1 | 1 |
| Hs.9914   | FST       | 1 | 1 | 0 | 1 | 0 | 1 | 1 |

|           |           |   |   |   |   |   |   |   |
|-----------|-----------|---|---|---|---|---|---|---|
| Hs.997    | P11       | 1 | 1 | 0 | 1 | 1 | 1 | 1 |
| Hs.103381 | JARID1C   | 1 | 1 | 0 | 0 | 0 | 0 | 1 |
| Hs.104938 | FLJ12949  | 1 | 1 | 0 | 0 | 0 | 1 | 1 |
| Hs.105818 | CDKL3     | 1 | 1 | 0 | 0 | 1 | 0 | 1 |
| Hs.109051 | SH3BGRL3  | 1 | 1 | 0 | 0 | 0 | 1 | 1 |
| Hs.110364 | PPIC      | 1 | 1 | 0 | 0 | 1 | 0 | 1 |
| Hs.111125 | SPC12     | 1 | 1 | 0 | 0 | 0 | 0 | 1 |
| Hs.112933 | PARD6A    | 1 | 1 | 0 | 0 | 0 | 0 | 1 |
| Hs.115242 | DRG1      | 1 | 1 | 0 | 0 | 0 | 1 | 1 |
| Hs.11590  | CTSF      | 1 | 1 | 0 | 0 | 0 | 1 | 1 |
| Hs.119537 | KHDRBS1   | 1 | 1 | 0 | 0 | 0 | 1 | 1 |
| Hs.12126  | HCA112    | 1 | 1 | 0 | 0 | 0 | 0 | 1 |
| Hs.12142  | WDR13     | 1 | 1 | 0 | 0 | 0 | 0 | 1 |
| Hs.131731 | RNF121    | 1 | 1 | 0 | 0 | 0 | 0 | 1 |
| Hs.132355 | RABL3     | 1 | 1 | 0 | 0 | 0 | 0 | 1 |
| Hs.132399 | LOC401251 | 1 | 1 | 0 | 0 | 0 | 1 | 1 |
| Hs.133082 | DDX31     | 1 | 1 | 0 | 0 | 0 | 1 | 1 |
| Hs.137568 | PITX3     | 1 | 1 | 0 | 0 | 1 | 0 | 1 |
| Hs.139226 | RFC2      | 1 | 1 | 0 | 0 | 0 | 1 | 1 |
| Hs.1408   | EDN3      | 1 | 1 | 0 | 0 | 0 | 0 | 1 |
| Hs.14222  | LOC129531 | 1 | 1 | 0 | 0 | 0 | 1 | 1 |
| Hs.143102 | AOC2      | 1 | 1 | 0 | 0 | 0 | 0 | 1 |
| Hs.143907 | TBX4      | 1 | 1 | 0 | 0 | 0 | 0 | 1 |
| Hs.145381 | GTF2E1    | 1 | 1 | 0 | 0 | 0 | 0 | 1 |
| Hs.14779  | ACAS2     | 1 | 1 | 0 | 0 | 0 | 1 | 1 |
| Hs.153563 | LY75      | 1 | 1 | 0 | 0 | 1 | 1 | 1 |
| Hs.154210 | EDG1      | 1 | 1 | 0 | 0 | 1 | 1 | 1 |
| Hs.15456  | PDZK1     | 1 | 1 | 0 | 0 | 1 | 1 | 1 |
| Hs.155106 | RAMP2     | 1 | 1 | 0 | 0 | 1 | 0 | 1 |
| Hs.158173 | KCNN1     | 1 | 1 | 0 | 0 | 0 | 0 | 1 |
| Hs.159479 | GALNS     | 1 | 1 | 0 | 0 | 1 | 0 | 1 |
| Hs.17109  | ITM2A     | 1 | 1 | 0 | 0 | 0 | 1 | 1 |
| Hs.171825 | BHLHB2    | 1 | 1 | 0 | 0 | 1 | 1 | 1 |
| Hs.1721   | IL11      | 1 | 1 | 0 | 0 | 1 | 0 | 1 |
| Hs.173381 | DPYSL2    | 1 | 1 | 0 | 0 | 0 | 0 | 1 |
| Hs.1867   | PGC       | 1 | 1 | 0 | 0 | 0 | 1 | 1 |
| Hs.189575 | VTI1A     | 1 | 1 | 0 | 0 | 0 | 0 | 1 |
| Hs.190161 | LR8       | 1 | 1 | 0 | 0 | 0 | 0 | 1 |
| Hs.193044 | KCNJ5     | 1 | 1 | 0 | 0 | 0 | 0 | 1 |
| Hs.197029 | ADORA2A   | 1 | 1 | 0 | 0 | 1 | 0 | 1 |
| Hs.201671 | SOX13     | 1 | 1 | 0 | 0 | 1 | 1 | 1 |
| Hs.20447  | PAK4      | 1 | 1 | 0 | 0 | 0 | 0 | 1 |
| Hs.22302  | GTF3C4    | 1 | 1 | 0 | 0 | 1 | 1 | 1 |
| Hs.22353  | ZDHHC6    | 1 | 1 | 0 | 0 | 0 | 0 | 1 |
| Hs.246310 | ATP5J     | 1 | 1 | 0 | 0 | 1 | 1 | 1 |
| Hs.249227 | ATP6V1G2  | 1 | 1 | 0 | 0 | 0 | 1 | 1 |
| Hs.258326 | LOC51760  | 1 | 1 | 0 | 0 | 0 | 0 | 1 |

|           |          |   |   |   |   |   |   |   |
|-----------|----------|---|---|---|---|---|---|---|
| Hs.266514 | FLJ11342 | 1 | 1 | 0 | 0 | 0 | 0 | 1 |
| Hs.26880  | ECEL1    | 1 | 1 | 0 | 0 | 0 | 0 | 1 |
| Hs.274543 | EFG1     | 1 | 1 | 0 | 0 | 0 | 0 | 1 |
| Hs.277445 | DGKZ     | 1 | 1 | 0 | 0 | 1 | 1 | 1 |
| Hs.282883 | MGC4251  | 1 | 1 | 0 | 0 | 0 | 1 | 1 |
| Hs.282938 | COL4A4   | 1 | 1 | 0 | 0 | 0 | 1 | 1 |
| Hs.284741 | FTO      | 1 | 1 | 0 | 0 | 0 | 1 | 1 |
| Hs.286131 | F-LANa   | 1 | 1 | 0 | 0 | 0 | 1 | 1 |
| Hs.287735 | TRIM46   | 1 | 1 | 0 | 0 | 1 | 0 | 1 |
| Hs.291981 | ARPC1A   | 1 | 1 | 0 | 0 | 0 | 1 | 1 |
| Hs.300701 | MGC8685  | 1 | 1 | 0 | 0 | 0 | 0 | 1 |
| Hs.301348 | EMS1     | 1 | 1 | 0 | 0 | 0 | 1 | 1 |
| Hs.30570  | PQBP1    | 1 | 1 | 0 | 0 | 0 | 1 | 1 |
| Hs.305971 | SLC2A10  | 1 | 1 | 0 | 0 | 0 | 0 | 1 |
| Hs.306711 | ELKS     | 1 | 1 | 0 | 0 | 0 | 1 | 1 |
| Hs.323966 | H63      | 1 | 1 | 0 | 0 | 0 | 0 | 1 |
| Hs.326586 | MGC11134 | 1 | 1 | 0 | 0 | 0 | 1 | 1 |
| Hs.32721  | SAG      | 1 | 1 | 0 | 0 | 1 | 1 | 1 |
| Hs.334347 | CKM      | 1 | 1 | 0 | 0 | 1 | 0 | 1 |
| Hs.33470  | LGI3     | 1 | 1 | 0 | 0 | 0 | 0 | 1 |
| Hs.334851 | LASP1    | 1 | 1 | 0 | 0 | 0 | 0 | 1 |
| Hs.334878 | FLJ14775 | 1 | 1 | 0 | 0 | 0 | 1 | 1 |
| Hs.342307 | FLJ10330 | 1 | 1 | 0 | 0 | 0 | 1 | 1 |
| Hs.356838 | CRSP7    | 1 | 1 | 0 | 0 | 0 | 1 | 1 |
| Hs.3631   | IGBP1    | 1 | 1 | 0 | 0 | 0 | 1 | 1 |
| Hs.367811 | STK38    | 1 | 1 | 0 | 0 | 0 | 0 | 1 |
| Hs.368434 | FLJ42117 | 1 | 1 | 0 | 0 | 0 | 1 | 1 |
| Hs.371905 | SLC2A4   | 1 | 1 | 0 | 0 | 0 | 1 | 1 |
| Hs.372031 | PMP22    | 1 | 1 | 0 | 0 | 1 | 0 | 1 |
| Hs.374854 | KRTCAP2  | 1 | 1 | 0 | 0 | 1 | 1 | 1 |
| Hs.375179 | ADSSL1   | 1 | 1 | 0 | 0 | 1 | 1 | 1 |
| Hs.376314 | PPOX     | 1 | 1 | 0 | 0 | 0 | 1 | 1 |
| Hs.380819 | PLD1     | 1 | 1 | 0 | 0 | 0 | 0 | 1 |
| Hs.383018 | EAF2     | 1 | 1 | 0 | 0 | 0 | 0 | 1 |
| Hs.385986 | UBE2B    | 1 | 1 | 0 | 0 | 1 | 0 | 1 |
| Hs.387239 | LCAT     | 1 | 1 | 0 | 0 | 1 | 1 | 1 |
| Hs.388289 | KCNQ3    | 1 | 1 | 0 | 0 | 0 | 1 | 1 |
| Hs.40065  | MGC4825  | 1 | 1 | 0 | 0 | 1 | 0 | 1 |
| Hs.404323 | FLJ10156 | 1 | 1 | 0 | 0 | 0 | 0 | 1 |
| Hs.408073 | RPS6     | 1 | 1 | 0 | 0 | 0 | 0 | 1 |
| Hs.408543 | MBP      | 1 | 1 | 0 | 0 | 1 | 1 | 1 |
| Hs.41007  | MRPL22   | 1 | 1 | 0 | 0 | 0 | 1 | 1 |
| Hs.410477 | PLA2R1   | 1 | 1 | 0 | 0 | 0 | 0 | 1 |
| Hs.414455 | ZNF161   | 1 | 1 | 0 | 0 | 1 | 1 | 1 |
| Hs.416262 | SOLH     | 1 | 1 | 0 | 0 | 0 | 0 | 1 |
| Hs.421646 | TAF12    | 1 | 1 | 0 | 0 | 1 | 1 | 1 |
| Hs.4273   | B3GAT2   | 1 | 1 | 0 | 0 | 0 | 1 | 1 |

|           |              |   |   |   |   |   |   |   |
|-----------|--------------|---|---|---|---|---|---|---|
| Hs.432132 | G0S2         | 1 | 1 | 0 | 0 | 0 | 1 | 1 |
| Hs.433559 | PSMD10       | 1 | 1 | 0 | 0 | 0 | 0 | 1 |
| Hs.433984 | SLC4A2       | 1 | 1 | 0 | 0 | 0 | 0 | 1 |
| Hs.434489 | FLJ90013     | 1 | 1 | 0 | 0 | 1 | 0 | 1 |
| Hs.435238 | PPP1R1A      | 1 | 1 | 0 | 0 | 1 | 0 | 1 |
| Hs.435802 | IQCB1        | 1 | 1 | 0 | 0 | 0 | 0 | 1 |
| Hs.442818 | FAM13A1      | 1 | 1 | 0 | 0 | 0 | 1 | 1 |
| Hs.445168 | DDX51        | 1 | 1 | 0 | 0 | 0 | 1 | 1 |
| Hs.446471 | CD74         | 1 | 1 | 0 | 0 | 0 | 1 | 1 |
| Hs.47572  | ELAC1        | 1 | 1 | 0 | 0 | 0 | 0 | 1 |
| Hs.512680 | SCGF         | 1 | 1 | 0 | 0 | 1 | 0 | 1 |
| Hs.512763 | STK22C       | 1 | 1 | 0 | 0 | 0 | 0 | 1 |
| Hs.526393 | MYH2         | 1 | 1 | 0 | 0 | 0 | 1 | 1 |
| Hs.528638 | MGC14560     | 1 | 1 | 0 | 0 | 0 | 1 | 1 |
| Hs.5662   | GNB2L1       | 1 | 1 | 0 | 0 | 0 | 0 | 1 |
| Hs.5897   | ANTXR2       | 1 | 1 | 0 | 0 | 1 | 1 | 1 |
| Hs.62813  | INSM2        | 1 | 1 | 0 | 0 | 1 | 0 | 1 |
| Hs.66708  | VAMP3        | 1 | 1 | 0 | 0 | 1 | 0 | 1 |
| Hs.7117   | GRIA1        | 1 | 1 | 0 | 0 | 1 | 1 | 1 |
| Hs.71252  | DKFZp761C169 | 1 | 1 | 0 | 0 | 1 | 1 | 1 |
| Hs.75258  | H2AFY        | 1 | 1 | 0 | 0 | 0 | 0 | 1 |
| Hs.75589  | ACP2         | 1 | 1 | 0 | 0 | 0 | 0 | 1 |
| Hs.76873  | HYAL2        | 1 | 1 | 0 | 0 | 0 | 1 | 1 |
| Hs.7733   | TTC1         | 1 | 1 | 0 | 0 | 0 | 0 | 1 |
| Hs.78854  | ATP1B2       | 1 | 1 | 0 | 0 | 1 | 1 | 1 |
| Hs.79000  | GAP43        | 1 | 1 | 0 | 0 | 1 | 1 | 1 |
| Hs.7942   | FLJ20080     | 1 | 1 | 0 | 0 | 0 | 1 | 1 |
| Hs.7953   | GOLGA7       | 1 | 1 | 0 | 0 | 0 | 0 | 1 |
| Hs.82116  | MYD88        | 1 | 1 | 0 | 0 | 1 | 0 | 1 |
| Hs.82129  | CA3          | 1 | 1 | 0 | 0 | 1 | 1 | 1 |
| Hs.83572  | PTPN11       | 1 | 1 | 0 | 0 | 1 | 0 | 1 |
| Hs.8763   | APG4A        | 1 | 1 | 0 | 0 | 0 | 0 | 1 |
| Hs.89781  | UBTF         | 1 | 1 | 0 | 0 | 0 | 0 | 1 |
| Hs.90691  | NPM3         | 1 | 1 | 0 | 0 | 0 | 0 | 1 |
| Hs.91773  | PPP2CA       | 1 | 1 | 0 | 0 | 0 | 1 | 1 |
| Hs.93207  | NF1          | 1 | 1 | 0 | 0 | 0 | 1 | 1 |
| Hs.93597  | CDK5R1       | 1 | 1 | 0 | 0 | 0 | 1 | 1 |
| Hs.942    | TACR3        | 1 | 1 | 0 | 0 | 0 | 1 | 1 |
| Hs.100426 | BRMS1        | 1 | 1 | 1 | 1 | 0 | 0 | 1 |
| Hs.101742 | C16orf40     | 1 | 1 | 1 | 1 | 0 | 0 | 1 |
| Hs.106346 | NOL7         | 1 | 1 | 1 | 1 | 0 | 1 | 1 |
| Hs.106876 | ATP6V0D1     | 1 | 1 | 1 | 1 | 0 | 0 | 1 |
| Hs.108923 | RAB38        | 1 | 1 | 1 | 1 | 0 | 1 | 1 |
| Hs.111373 | KIAA0423     | 1 | 1 | 1 | 1 | 1 | 0 | 1 |
| Hs.117339 | HCST         | 1 | 1 | 1 | 1 | 1 | 1 | 1 |
| Hs.117956 | RORB         | 1 | 1 | 1 | 1 | 0 | 0 | 1 |
| Hs.121870 | NCDN         | 1 | 1 | 1 | 1 | 0 | 0 | 1 |

|           |          |   |   |   |   |   |   |   |
|-----------|----------|---|---|---|---|---|---|---|
| Hs.124574 | TAS1R1   | 1 | 1 | 1 | 1 | 0 | 0 | 1 |
| Hs.126774 | RAMP     | 1 | 1 | 1 | 1 | 0 | 1 | 1 |
| Hs.127648 | SLCO4C1  | 1 | 1 | 1 | 1 | 1 | 0 | 1 |
| Hs.1288   | ACTA1    | 1 | 1 | 1 | 1 | 1 | 1 | 1 |
| Hs.137400 | TUBA8    | 1 | 1 | 1 | 1 | 1 | 1 | 1 |
| Hs.145156 | MGC8407  | 1 | 1 | 1 | 1 | 0 | 1 | 1 |
| Hs.147989 | CACNG1   | 1 | 1 | 1 | 1 | 0 | 0 | 1 |
| Hs.148845 | MGC955   | 1 | 1 | 1 | 1 | 0 | 0 | 1 |
| Hs.15098  | THTPA    | 1 | 1 | 1 | 1 | 0 | 1 | 1 |
| Hs.153850 | CHTF18   | 1 | 1 | 1 | 1 | 0 | 0 | 1 |
| Hs.154196 | E4F1     | 1 | 1 | 1 | 1 | 1 | 1 | 1 |
| Hs.158329 | GPR50    | 1 | 1 | 1 | 1 | 1 | 1 | 1 |
| Hs.163484 | FOXA1    | 1 | 1 | 1 | 1 | 0 | 1 | 1 |
| Hs.16743  | ADMR     | 1 | 1 | 1 | 1 | 0 | 1 | 1 |
| Hs.170623 | FGD6     | 1 | 1 | 1 | 1 | 0 | 1 | 1 |
| Hs.17144  | DHRS3    | 1 | 1 | 1 | 1 | 0 | 0 | 1 |
| Hs.171834 | PCTK1    | 1 | 1 | 1 | 1 | 0 | 1 | 1 |
| Hs.173043 | MTA2     | 1 | 1 | 1 | 1 | 0 | 0 | 1 |
| Hs.177677 | RRP40    | 1 | 1 | 1 | 1 | 0 | 0 | 1 |
| Hs.18021  | ADPRHL2  | 1 | 1 | 1 | 1 | 0 | 0 | 1 |
| Hs.181461 | ARIH1    | 1 | 1 | 1 | 1 | 0 | 0 | 1 |
| Hs.182421 | TNNC2    | 1 | 1 | 1 | 1 | 0 | 1 | 1 |
| Hs.183088 | ACR      | 1 | 1 | 1 | 1 | 1 | 1 | 1 |
| Hs.193370 | LIMD1    | 1 | 1 | 1 | 1 | 0 | 1 | 1 |
| Hs.196966 | KIAA0298 | 1 | 1 | 1 | 1 | 1 | 1 | 1 |
| Hs.197687 | FLJ90492 | 1 | 1 | 1 | 1 | 0 | 1 | 1 |
| Hs.198468 | PPARGC1A | 1 | 1 | 1 | 1 | 1 | 1 | 1 |
| Hs.209983 | STMN1    | 1 | 1 | 1 | 1 | 0 | 1 | 1 |
| Hs.211701 | GPC2     | 1 | 1 | 1 | 1 | 0 | 1 | 1 |
| Hs.21611  | KIF3C    | 1 | 1 | 1 | 1 | 0 | 1 | 1 |
| Hs.21     | ELA2A    | 1 | 1 | 1 | 1 | 0 | 0 | 1 |
| Hs.225936 | SYN1     | 1 | 1 | 1 | 1 | 0 | 1 | 1 |
| Hs.225979 | RAP2C    | 1 | 1 | 1 | 1 | 0 | 0 | 1 |
| Hs.2280   | RPN1     | 1 | 1 | 1 | 1 | 1 | 1 | 1 |
| Hs.23106  | THRAP4   | 1 | 1 | 1 | 1 | 1 | 1 | 1 |
| Hs.23131  | KIFC3    | 1 | 1 | 1 | 1 | 1 | 0 | 1 |
| Hs.2316   | SOX9     | 1 | 1 | 1 | 1 | 0 | 1 | 1 |
| Hs.231829 | GAD2     | 1 | 1 | 1 | 1 | 0 | 1 | 1 |
| Hs.237028 | NPR3     | 1 | 1 | 1 | 1 | 0 | 0 | 1 |
| Hs.23935  | USP43    | 1 | 1 | 1 | 1 | 1 | 1 | 1 |
| Hs.2393   | PHKA1    | 1 | 1 | 1 | 1 | 1 | 0 | 1 |
| Hs.23965  | SLC22A6  | 1 | 1 | 1 | 1 | 0 | 0 | 1 |
| Hs.24135  | VEZATIN  | 1 | 1 | 1 | 1 | 0 | 1 | 1 |
| Hs.246381 | CD68     | 1 | 1 | 1 | 1 | 0 | 0 | 1 |
| Hs.246845 | LY6G5C   | 1 | 1 | 1 | 1 | 0 | 0 | 1 |
| Hs.24763  | RANBP1   | 1 | 1 | 1 | 1 | 1 | 0 | 1 |
| Hs.248049 | FGF10    | 1 | 1 | 1 | 1 | 1 | 1 | 1 |

|           |              |   |   |   |   |   |   |   |
|-----------|--------------|---|---|---|---|---|---|---|
| Hs.25348  | VAMP2        | 1 | 1 | 1 | 1 | 1 | 1 | 1 |
| Hs.26770  | FABP7        | 1 | 1 | 1 | 1 | 0 | 1 | 1 |
| Hs.274151 | LGTN         | 1 | 1 | 1 | 1 | 0 | 0 | 1 |
| Hs.283875 | C6orf27      | 1 | 1 | 1 | 1 | 1 | 0 | 1 |
| Hs.2839   | NDP          | 1 | 1 | 1 | 1 | 0 | 1 | 1 |
| Hs.288261 | MADH3        | 1 | 1 | 1 | 1 | 0 | 1 | 1 |
| Hs.298275 | SLC38A2      | 1 | 1 | 1 | 1 | 0 | 0 | 1 |
| Hs.298469 | ACE          | 1 | 1 | 1 | 1 | 1 | 0 | 1 |
| Hs.300052 | TCERG1       | 1 | 1 | 1 | 1 | 0 | 1 | 1 |
| Hs.300825 | BID          | 1 | 1 | 1 | 1 | 0 | 0 | 1 |
| Hs.30954  | PMVK         | 1 | 1 | 1 | 1 | 0 | 0 | 1 |
| Hs.310922 | BCL2L13      | 1 | 1 | 1 | 1 | 1 | 1 | 1 |
| Hs.31121  | SNTA1        | 1 | 1 | 1 | 1 | 0 | 1 | 1 |
| Hs.311625 | PPAT         | 1 | 1 | 1 | 1 | 0 | 1 | 1 |
| Hs.313068 | PKP1         | 1 | 1 | 1 | 1 | 0 | 1 | 1 |
| Hs.317192 | DNAJB11      | 1 | 1 | 1 | 1 | 1 | 1 | 1 |
| Hs.323634 | STAG3        | 1 | 1 | 1 | 1 | 0 | 1 | 1 |
| Hs.333388 | PP3856       | 1 | 1 | 1 | 1 | 1 | 0 | 1 |
| Hs.343579 | MRPL14       | 1 | 1 | 1 | 1 | 0 | 0 | 1 |
| Hs.355724 | CFLAR        | 1 | 1 | 1 | 1 | 0 | 1 | 1 |
| Hs.356427 | PAI-RBP1     | 1 | 1 | 1 | 1 | 1 | 0 | 1 |
| Hs.357384 | PDE7A        | 1 | 1 | 1 | 1 | 1 | 0 | 1 |
| Hs.368605 | RAI14        | 1 | 1 | 1 | 1 | 0 | 1 | 1 |
| Hs.369586 | MBTD1        | 1 | 1 | 1 | 1 | 0 | 1 | 1 |
| Hs.370041 | FOXJ1        | 1 | 1 | 1 | 1 | 0 | 0 | 1 |
| Hs.370421 | MYO7A        | 1 | 1 | 1 | 1 | 1 | 1 | 1 |
| Hs.370480 | ABCB7        | 1 | 1 | 1 | 1 | 0 | 0 | 1 |
| Hs.37058  | CALCA        | 1 | 1 | 1 | 1 | 0 | 1 | 1 |
| Hs.371617 | RNF110       | 1 | 1 | 1 | 1 | 0 | 0 | 1 |
| Hs.380460 | ICA1         | 1 | 1 | 1 | 1 | 1 | 1 | 1 |
| Hs.381232 | BCAP31       | 1 | 1 | 1 | 1 | 0 | 0 | 1 |
| Hs.385548 | DKFZP434B168 | 1 | 1 | 1 | 1 | 0 | 1 | 1 |
| Hs.388927 | YY1          | 1 | 1 | 1 | 1 | 1 | 0 | 1 |
| Hs.3903   | CDC42EP4     | 1 | 1 | 1 | 1 | 0 | 1 | 1 |
| Hs.400556 | BCAS1        | 1 | 1 | 1 | 1 | 0 | 0 | 1 |
| Hs.401903 | COX5A        | 1 | 1 | 1 | 1 | 0 | 0 | 1 |
| Hs.405774 | CTRL         | 1 | 1 | 1 | 1 | 0 | 1 | 1 |
| Hs.406    | SLC6A3       | 1 | 1 | 1 | 1 | 1 | 1 | 1 |
| Hs.407933 | AGPS         | 1 | 1 | 1 | 1 | 0 | 0 | 1 |
| Hs.412014 | MBTPS2       | 1 | 1 | 1 | 1 | 0 | 0 | 1 |
| Hs.413457 | MGC35138     | 1 | 1 | 1 | 1 | 0 | 0 | 1 |
| Hs.41565  | GDF8         | 1 | 1 | 1 | 1 | 0 | 1 | 1 |
| Hs.416769 | PPM1B        | 1 | 1 | 1 | 1 | 0 | 1 | 1 |
| Hs.419320 | TA-NFKBH     | 1 | 1 | 1 | 1 | 1 | 1 | 1 |
| Hs.427055 | NR0B2        | 1 | 1 | 1 | 1 | 0 | 1 | 1 |
| Hs.431871 | SVH          | 1 | 1 | 1 | 1 | 0 | 0 | 1 |
| Hs.432503 | UBXD3        | 1 | 1 | 1 | 1 | 0 | 1 | 1 |



|           |           |   |   |   |   |   |   |   |
|-----------|-----------|---|---|---|---|---|---|---|
| Hs.433046 | ATF6      | 1 | 1 | 1 | 1 | 0 | 1 | 1 |
| Hs.433328 | P17.3     | 1 | 1 | 1 | 1 | 1 | 0 | 1 |
| Hs.43509  | A2LP      | 1 | 1 | 1 | 1 | 0 | 1 | 1 |
| Hs.437191 | PTRF      | 1 | 1 | 1 | 1 | 1 | 1 | 1 |
| Hs.437214 | MAP3K9    | 1 | 1 | 1 | 1 | 0 | 0 | 1 |
| Hs.437656 | LEPRE1    | 1 | 1 | 1 | 1 | 0 | 0 | 1 |
| Hs.437877 | AMHR2     | 1 | 1 | 1 | 1 | 0 | 1 | 1 |
| Hs.439486 | ONECUT1   | 1 | 1 | 1 | 1 | 0 | 1 | 1 |
| Hs.439586 | TM4SF2    | 1 | 1 | 1 | 1 | 1 | 0 | 1 |
| Hs.439909 | SLC24A3   | 1 | 1 | 1 | 1 | 1 | 1 | 1 |
| Hs.441503 | CGI-48    | 1 | 1 | 1 | 1 | 0 | 1 | 1 |
| Hs.443518 | BPAG1     | 1 | 1 | 1 | 1 | 0 | 0 | 1 |
| Hs.443661 | SYNJ2BP   | 1 | 1 | 1 | 1 | 1 | 0 | 1 |
| Hs.444439 | PAICS     | 1 | 1 | 1 | 1 | 0 | 1 | 1 |
| Hs.444818 | CGGBP1    | 1 | 1 | 1 | 1 | 1 | 1 | 1 |
| Hs.448738 | FTH1      | 1 | 1 | 1 | 1 | 1 | 1 | 1 |
| Hs.46362  | HTR2C     | 1 | 1 | 1 | 1 | 0 | 1 | 1 |
| Hs.46446  | LYL1      | 1 | 1 | 1 | 1 | 0 | 1 | 1 |
| Hs.46458  | LEPREL2   | 1 | 1 | 1 | 1 | 0 | 1 | 1 |
| Hs.4845   | MGC29463  | 1 | 1 | 1 | 1 | 1 | 0 | 1 |
| Hs.48642  | C14orf140 | 1 | 1 | 1 | 1 | 0 | 1 | 1 |
| Hs.49322  | DIO3      | 1 | 1 | 1 | 1 | 1 | 1 | 1 |
| Hs.503880 | LOC130940 | 1 | 1 | 1 | 1 | 1 | 1 | 1 |
| Hs.505806 | PBXIP1    | 1 | 1 | 1 | 1 | 0 | 1 | 1 |
| Hs.511525 | PRSS1     | 1 | 1 | 1 | 1 | 0 | 1 | 1 |
| Hs.511952 | CBX6      | 1 | 1 | 1 | 1 | 0 | 1 | 1 |
| Hs.512587 | MST1      | 1 | 1 | 1 | 1 | 1 | 1 | 1 |
| Hs.512814 | TOP3B     | 1 | 1 | 1 | 1 | 0 | 1 | 1 |
| Hs.517102 | FY        | 1 | 1 | 1 | 1 | 0 | 1 | 1 |
| Hs.528397 | PAQR9     | 1 | 1 | 1 | 1 | 0 | 0 | 1 |
| Hs.56     | PRPS1     | 1 | 1 | 1 | 1 | 1 | 1 | 1 |
| Hs.59425  | FLJ23323  | 1 | 1 | 1 | 1 | 0 | 0 | 1 |
| Hs.65436  | LOXL1     | 1 | 1 | 1 | 1 | 1 | 0 | 1 |
| Hs.6793   | PAFAH1B3  | 1 | 1 | 1 | 1 | 1 | 0 | 1 |
| Hs.68137  | ADCYAP1   | 1 | 1 | 1 | 1 | 0 | 1 | 1 |
| Hs.7195   | GABRG2    | 1 | 1 | 1 | 1 | 1 | 1 | 1 |
| Hs.72925  | C11orf13  | 1 | 1 | 1 | 1 | 0 | 0 | 1 |
| Hs.73708  | ANKRD2    | 1 | 1 | 1 | 1 | 0 | 0 | 1 |
| Hs.73769  | FOLR1     | 1 | 1 | 1 | 1 | 0 | 1 | 1 |
| Hs.7378   | LL5beta   | 1 | 1 | 1 | 1 | 1 | 1 | 1 |
| Hs.73817  | CCL3      | 1 | 1 | 1 | 1 | 1 | 1 | 1 |
| Hs.74375  | DVL1      | 1 | 1 | 1 | 1 | 0 | 1 | 1 |
| Hs.75061  | MLP       | 1 | 1 | 1 | 1 | 0 | 1 | 1 |
| Hs.75081  | APC       | 1 | 1 | 1 | 1 | 1 | 0 | 1 |
| Hs.75087  | FASTK     | 1 | 1 | 1 | 1 | 0 | 1 | 1 |
| Hs.75183  | CYP2E1    | 1 | 1 | 1 | 1 | 1 | 1 | 1 |
| Hs.75243  | BRD2      | 1 | 1 | 1 | 1 | 0 | 0 | 1 |

|           |            |   |   |   |   |   |   |   |
|-----------|------------|---|---|---|---|---|---|---|
| Hs.76277  | DP1L1      | 1 | 1 | 1 | 1 | 0 | 0 | 1 |
| Hs.778    | GUCA2A     | 1 | 1 | 1 | 1 | 1 | 1 | 1 |
| Hs.7835   | MRC2       | 1 | 1 | 1 | 1 | 1 | 1 | 1 |
| Hs.78629  | ATP1B1     | 1 | 1 | 1 | 1 | 0 | 1 | 1 |
| Hs.79219  | RGL1       | 1 | 1 | 1 | 1 | 1 | 1 | 1 |
| Hs.79386  | LMOD1      | 1 | 1 | 1 | 1 | 1 | 1 | 1 |
| Hs.80552  | DPT        | 1 | 1 | 1 | 1 | 0 | 1 | 1 |
| Hs.84999  | ATP7B      | 1 | 1 | 1 | 1 | 0 | 1 | 1 |
| Hs.87469  | CHPF       | 1 | 1 | 1 | 1 | 1 | 1 | 1 |
| Hs.90998  | 6-Sep      | 1 | 1 | 1 | 1 | 0 | 1 | 1 |
| Hs.91390  | PARG       | 1 | 1 | 1 | 1 | 0 | 1 | 1 |
| Hs.94785  | TGIF2      | 1 | 1 | 1 | 1 | 0 | 0 | 1 |
| Hs.9599   | SLC25A13   | 1 | 1 | 1 | 1 | 0 | 1 | 1 |
| Hs.96055  | E2F1       | 1 | 1 | 1 | 1 | 1 | 1 | 1 |
| Hs.97542  | PLCZ1      | 1 | 1 | 1 | 1 | 0 | 1 | 1 |
| Hs.97633  | AKAP4      | 1 | 1 | 1 | 1 | 1 | 1 | 1 |
| Hs.99398  | BTBD5      | 1 | 1 | 1 | 1 | 1 | 1 | 1 |
| Hs.99992  | HOXB1      | 1 | 1 | 1 | 1 | 0 | 1 | 1 |
| Hs.105509 | CTL2       | 1 | 1 | 1 | 0 | 0 | 0 | 1 |
| Hs.106070 | CDKN1C     | 1 | 1 | 1 | 0 | 0 | 0 | 1 |
| Hs.108118 | GRTP1      | 1 | 1 | 1 | 0 | 0 | 0 | 1 |
| Hs.109672 | ST6GALNAC6 | 1 | 1 | 1 | 0 | 0 | 0 | 1 |
| Hs.109706 | HN1        | 1 | 1 | 1 | 0 | 0 | 1 | 1 |
| Hs.110746 | C6orf18    | 1 | 1 | 1 | 0 | 0 | 1 | 1 |
| Hs.1119   | NR4A1      | 1 | 1 | 1 | 0 | 0 | 1 | 1 |
| Hs.113657 | SLCO3A1    | 1 | 1 | 1 | 0 | 0 | 0 | 1 |
| Hs.114311 | CDC45L     | 1 | 1 | 1 | 0 | 1 | 1 | 1 |
| Hs.11900  | KIAA1847   | 1 | 1 | 1 | 0 | 0 | 0 | 1 |
| Hs.119316 | PET112L    | 1 | 1 | 1 | 0 | 1 | 0 | 1 |
| Hs.12436  | CAMK2G     | 1 | 1 | 1 | 0 | 0 | 0 | 1 |
| Hs.129706 | PAX4       | 1 | 1 | 1 | 0 | 0 | 1 | 1 |
| Hs.130005 | UMOD       | 1 | 1 | 1 | 0 | 0 | 1 | 1 |
| Hs.131288 | CAPZA3     | 1 | 1 | 1 | 0 | 0 | 0 | 1 |
| Hs.133892 | TPM1       | 1 | 1 | 1 | 0 | 0 | 0 | 1 |
| Hs.134725 | ELP4       | 1 | 1 | 1 | 0 | 0 | 1 | 1 |
| Hs.134846 | MGC24381   | 1 | 1 | 1 | 0 | 1 | 0 | 1 |
| Hs.147111 | ATP12A     | 1 | 1 | 1 | 0 | 0 | 0 | 1 |
| Hs.153504 | TOM1L1     | 1 | 1 | 1 | 0 | 0 | 1 | 1 |
| Hs.153692 | MASS1      | 1 | 1 | 1 | 0 | 0 | 0 | 1 |
| Hs.154073 | SLC35B1    | 1 | 1 | 1 | 0 | 1 | 1 | 1 |
| Hs.154078 | LBP        | 1 | 1 | 1 | 0 | 0 | 0 | 1 |
| Hs.155573 | POLH       | 1 | 1 | 1 | 0 | 0 | 0 | 1 |
| Hs.155591 | FOXF1      | 1 | 1 | 1 | 0 | 0 | 1 | 1 |
| Hs.156007 | DSCR1L1    | 1 | 1 | 1 | 0 | 1 | 1 | 1 |
| Hs.16426  | PODXL      | 1 | 1 | 1 | 0 | 0 | 1 | 1 |
| Hs.165263 | PHC2       | 1 | 1 | 1 | 0 | 0 | 1 | 1 |
| Hs.170133 | FOXO1A     | 1 | 1 | 1 | 0 | 1 | 1 | 1 |

|           |          |   |   |   |   |   |   |   |
|-----------|----------|---|---|---|---|---|---|---|
| Hs.171044 | FLJ20343 | 1 | 1 | 1 | 0 | 0 | 0 | 1 |
| Hs.172690 | DGKA     | 1 | 1 | 1 | 0 | 0 | 1 | 1 |
| Hs.173946 | FLJ10486 | 1 | 1 | 1 | 0 | 0 | 0 | 1 |
| Hs.176658 | AQP8     | 1 | 1 | 1 | 0 | 0 | 1 | 1 |
| Hs.17839  | TNFAIP8  | 1 | 1 | 1 | 0 | 1 | 1 | 1 |
| Hs.179080 | VIAAT    | 1 | 1 | 1 | 0 | 0 | 1 | 1 |
| Hs.184492 | ELAVL1   | 1 | 1 | 1 | 0 | 1 | 0 | 1 |
| Hs.1872   | PCK1     | 1 | 1 | 1 | 0 | 0 | 0 | 1 |
| Hs.194774 | CNTFR    | 1 | 1 | 1 | 0 | 0 | 1 | 1 |
| Hs.202833 | HMOX1    | 1 | 1 | 1 | 0 | 0 | 1 | 1 |
| Hs.203206 | XPO5     | 1 | 1 | 1 | 0 | 0 | 0 | 1 |
| Hs.204041 | AHSA1    | 1 | 1 | 1 | 0 | 1 | 1 | 1 |
| Hs.205126 | PIGR     | 1 | 1 | 1 | 0 | 0 | 1 | 1 |
| Hs.20930  | PCBP4    | 1 | 1 | 1 | 0 | 0 | 1 | 1 |
| Hs.223296 | FLJ20522 | 1 | 1 | 1 | 0 | 0 | 0 | 1 |
| Hs.22     | TGM1     | 1 | 1 | 1 | 0 | 0 | 1 | 1 |
| Hs.241431 | GNAO1    | 1 | 1 | 1 | 0 | 0 | 1 | 1 |
| Hs.248087 | FGF22    | 1 | 1 | 1 | 0 | 0 | 1 | 1 |
| Hs.248114 | GDNF     | 1 | 1 | 1 | 0 | 0 | 1 | 1 |
| Hs.250894 | TCTA     | 1 | 1 | 1 | 0 | 0 | 1 | 1 |
| Hs.251399 | HRH3     | 1 | 1 | 1 | 0 | 1 | 0 | 1 |
| Hs.252229 | MAFG     | 1 | 1 | 1 | 0 | 1 | 1 | 1 |
| Hs.253309 | PTEN     | 1 | 1 | 1 | 0 | 1 | 1 | 1 |
| Hs.261134 | FLJ10737 | 1 | 1 | 1 | 0 | 0 | 1 | 1 |
| Hs.277132 | PKP4     | 1 | 1 | 1 | 0 | 0 | 1 | 1 |
| Hs.279861 | TMX2     | 1 | 1 | 1 | 0 | 1 | 1 | 1 |
| Hs.282111 | MGC15716 | 1 | 1 | 1 | 0 | 0 | 1 | 1 |
| Hs.282410 | CALM1    | 1 | 1 | 1 | 0 | 0 | 0 | 1 |
| Hs.282575 | C6orf75  | 1 | 1 | 1 | 0 | 0 | 0 | 1 |
| Hs.285813 | FLJ11807 | 1 | 1 | 1 | 0 | 0 | 1 | 1 |
| Hs.288555 | ELK3     | 1 | 1 | 1 | 0 | 1 | 1 | 1 |
| Hs.288568 | MGAT2    | 1 | 1 | 1 | 0 | 0 | 1 | 1 |
| Hs.288891 | MMS19L   | 1 | 1 | 1 | 0 | 0 | 1 | 1 |
| Hs.290404 | SLC25A3  | 1 | 1 | 1 | 0 | 0 | 1 | 1 |
| Hs.296198 | C12orf4  | 1 | 1 | 1 | 0 | 0 | 1 | 1 |
| Hs.296924 | ET       | 1 | 1 | 1 | 0 | 0 | 0 | 1 |
| Hs.297405 | MLPH     | 1 | 1 | 1 | 0 | 0 | 0 | 1 |
| Hs.2979   | TFF2     | 1 | 1 | 1 | 0 | 0 | 1 | 1 |
| Hs.300592 | MYBL1    | 1 | 1 | 1 | 0 | 0 | 1 | 1 |
| Hs.302051 | FLJ22865 | 1 | 1 | 1 | 0 | 0 | 0 | 1 |
| Hs.303523 | BPI      | 1 | 1 | 1 | 0 | 0 | 1 | 1 |
| Hs.3109   | ARHGAP4  | 1 | 1 | 1 | 0 | 0 | 1 | 1 |
| Hs.315485 | WWP2     | 1 | 1 | 1 | 0 | 1 | 1 | 1 |
| Hs.31595  | CLDN11   | 1 | 1 | 1 | 0 | 1 | 1 | 1 |
| Hs.322852 | GAS2L1   | 1 | 1 | 1 | 0 | 0 | 0 | 1 |
| Hs.333427 | 8D6A     | 1 | 1 | 1 | 0 | 0 | 0 | 1 |
| Hs.352671 | CRYZL1   | 1 | 1 | 1 | 0 | 0 | 0 | 1 |

|           |           |   |   |   |   |   |   |   |
|-----------|-----------|---|---|---|---|---|---|---|
| Hs.355333 | FLJ23841  | 1 | 1 | 1 | 0 | 0 | 0 | 1 |
| Hs.355515 | FLJ25059  | 1 | 1 | 1 | 0 | 0 | 1 | 1 |
| Hs.355533 | ADK       | 1 | 1 | 1 | 0 | 0 | 0 | 1 |
| Hs.355584 | MGC4189   | 1 | 1 | 1 | 0 | 0 | 1 | 1 |
| Hs.356626 | LOC125988 | 1 | 1 | 1 | 0 | 1 | 0 | 1 |
| Hs.35937  | MYF6      | 1 | 1 | 1 | 0 | 1 | 1 | 1 |
| Hs.360509 | FBP1      | 1 | 1 | 1 | 0 | 0 | 0 | 1 |
| Hs.370414 | NODAL     | 1 | 1 | 1 | 0 | 0 | 0 | 1 |
| Hs.372719 | PHF7      | 1 | 1 | 1 | 0 | 1 | 0 | 1 |
| Hs.376206 | KLF4      | 1 | 1 | 1 | 0 | 1 | 1 | 1 |
| Hs.378808 | eIF2A     | 1 | 1 | 1 | 0 | 0 | 1 | 1 |
| Hs.378885 | PIGW      | 1 | 1 | 1 | 0 | 0 | 0 | 1 |
| Hs.380081 | MGC11279  | 1 | 1 | 1 | 0 | 1 | 0 | 1 |
| Hs.380621 | TBC1D10   | 1 | 1 | 1 | 0 | 1 | 1 | 1 |
| Hs.381099 | LCP1      | 1 | 1 | 1 | 0 | 1 | 1 | 1 |
| Hs.381715 | TBX5      | 1 | 1 | 1 | 0 | 1 | 1 | 1 |
| Hs.385    | FLT3      | 1 | 1 | 1 | 0 | 0 | 0 | 1 |
| Hs.387567 | ACLY      | 1 | 1 | 1 | 0 | 0 | 0 | 1 |
| Hs.389107 | ATP6V0C   | 1 | 1 | 1 | 0 | 1 | 0 | 1 |
| Hs.389277 | ARFRP1    | 1 | 1 | 1 | 0 | 0 | 0 | 1 |
| Hs.389457 | T         | 1 | 1 | 1 | 0 | 1 | 1 | 1 |
| Hs.390162 | OPTN      | 1 | 1 | 1 | 0 | 0 | 0 | 1 |
| Hs.390662 | AIG1      | 1 | 1 | 1 | 0 | 0 | 1 | 1 |
| Hs.39252  | PICALM    | 1 | 1 | 1 | 0 | 0 | 0 | 1 |
| Hs.405946 | SOCS2     | 1 | 1 | 1 | 0 | 1 | 1 | 1 |
| Hs.407817 | COL4A3    | 1 | 1 | 1 | 0 | 0 | 1 | 1 |
| Hs.408316 | LY6G6D    | 1 | 1 | 1 | 0 | 0 | 1 | 1 |
| Hs.408754 | MAPRE1    | 1 | 1 | 1 | 0 | 0 | 1 | 1 |
| Hs.409202 | JAG1      | 1 | 1 | 1 | 0 | 0 | 0 | 1 |
| Hs.410455 | UNC119    | 1 | 1 | 1 | 0 | 0 | 1 | 1 |
| Hs.411456 | FLJ20244  | 1 | 1 | 1 | 0 | 0 | 1 | 1 |
| Hs.411826 | UBE2D3    | 1 | 1 | 1 | 0 | 0 | 0 | 1 |
| Hs.411865 | IPO4      | 1 | 1 | 1 | 0 | 0 | 0 | 1 |
| Hs.412228 | KHK       | 1 | 1 | 1 | 0 | 0 | 1 | 1 |
| Hs.413781 | LYPLA2    | 1 | 1 | 1 | 0 | 0 | 0 | 1 |
| Hs.413899 | HTR3A     | 1 | 1 | 1 | 0 | 1 | 1 | 1 |
| Hs.414334 | GSR       | 1 | 1 | 1 | 0 | 0 | 1 | 1 |
| Hs.414357 | RAB18     | 1 | 1 | 1 | 0 | 0 | 1 | 1 |
| Hs.416813 | ADRA1B    | 1 | 1 | 1 | 0 | 1 | 1 | 1 |
| Hs.417050 | CCNA1     | 1 | 1 | 1 | 0 | 0 | 0 | 1 |
| Hs.418105 | GRCA      | 1 | 1 | 1 | 0 | 0 | 1 | 1 |
| Hs.421257 | RPL7      | 1 | 1 | 1 | 0 | 1 | 1 | 1 |
| Hs.432855 | LAMC1     | 1 | 1 | 1 | 0 | 1 | 1 | 1 |
| Hs.433702 | EIF5      | 1 | 1 | 1 | 0 | 1 | 1 | 1 |
| Hs.434481 | LTK       | 1 | 1 | 1 | 0 | 0 | 0 | 1 |
| Hs.434488 | CSPG2     | 1 | 1 | 1 | 0 | 0 | 0 | 1 |
| Hs.434898 | ANAPC2    | 1 | 1 | 1 | 0 | 0 | 0 | 1 |

|           |              |   |   |   |   |   |   |   |
|-----------|--------------|---|---|---|---|---|---|---|
| Hs.435795 | IGFBP7       | 1 | 1 | 1 | 0 | 0 | 0 | 1 |
| Hs.436458 | POLE         | 1 | 1 | 1 | 0 | 0 | 0 | 1 |
| Hs.436593 | LMAN1        | 1 | 1 | 1 | 0 | 0 | 1 | 1 |
| Hs.437691 | ATP6V1E2     | 1 | 1 | 1 | 0 | 1 | 1 | 1 |
| Hs.439874 | SERP1        | 1 | 1 | 1 | 0 | 0 | 0 | 1 |
| Hs.440382 | RFP          | 1 | 1 | 1 | 0 | 1 | 1 | 1 |
| Hs.443452 | PRRX1        | 1 | 1 | 1 | 0 | 1 | 0 | 1 |
| Hs.443943 | COBL1        | 1 | 1 | 1 | 0 | 0 | 0 | 1 |
| Hs.446568 | TFG          | 1 | 1 | 1 | 0 | 0 | 1 | 1 |
| Hs.44893  | GA17         | 1 | 1 | 1 | 0 | 0 | 0 | 1 |
| Hs.450230 | IGFBP3       | 1 | 1 | 1 | 0 | 0 | 0 | 1 |
| Hs.472258 | SEDL         | 1 | 1 | 1 | 0 | 0 | 1 | 1 |
| Hs.49998  | LDB3         | 1 | 1 | 1 | 0 | 0 | 1 | 1 |
| Hs.512706 | TCF19        | 1 | 1 | 1 | 0 | 0 | 1 | 1 |
| Hs.519    | WWOX         | 1 | 1 | 1 | 0 | 0 | 0 | 1 |
| Hs.528354 | DKFZP564M182 | 1 | 1 | 1 | 0 | 0 | 0 | 1 |
| Hs.528713 | KIFC2        | 1 | 1 | 1 | 0 | 0 | 0 | 1 |
| Hs.539    | RPS29        | 1 | 1 | 1 | 0 | 1 | 0 | 1 |
| Hs.58324  | ADAMTS5      | 1 | 1 | 1 | 0 | 0 | 0 | 1 |
| Hs.58367  | GPC4         | 1 | 1 | 1 | 0 | 0 | 1 | 1 |
| Hs.597    | GOT1         | 1 | 1 | 1 | 0 | 0 | 0 | 1 |
| Hs.59838  | FLJ10808     | 1 | 1 | 1 | 0 | 0 | 0 | 1 |
| Hs.63841  | KBTBD7       | 1 | 1 | 1 | 0 | 1 | 1 | 1 |
| Hs.64004  | LOC153364    | 1 | 1 | 1 | 0 | 0 | 0 | 1 |
| Hs.6479   | MGC13272     | 1 | 1 | 1 | 0 | 0 | 1 | 1 |
| Hs.6483   | OFD1         | 1 | 1 | 1 | 0 | 0 | 1 | 1 |
| Hs.65234  | DDX27        | 1 | 1 | 1 | 0 | 0 | 1 | 1 |
| Hs.69954  | LAMC3        | 1 | 1 | 1 | 0 | 0 | 0 | 1 |
| Hs.73965  | SFRS2        | 1 | 1 | 1 | 0 | 0 | 0 | 1 |
| Hs.74335  | SLC35B2      | 1 | 1 | 1 | 0 | 0 | 1 | 1 |
| Hs.75863  | KIAA0218     | 1 | 1 | 1 | 0 | 0 | 0 | 1 |
| Hs.76239  | AKIP         | 1 | 1 | 1 | 0 | 0 | 0 | 1 |
| Hs.78601  | UROD         | 1 | 1 | 1 | 0 | 0 | 1 | 1 |
| Hs.78909  | ZFP36L2      | 1 | 1 | 1 | 0 | 1 | 0 | 1 |
| Hs.80342  | KRT15        | 1 | 1 | 1 | 0 | 1 | 0 | 1 |
| Hs.8375   | TRAF4        | 1 | 1 | 1 | 0 | 0 | 0 | 1 |
| Hs.8578   | RAPGEF3      | 1 | 1 | 1 | 0 | 0 | 1 | 1 |
| Hs.8876   | NAGS         | 1 | 1 | 1 | 0 | 0 | 0 | 1 |
| Hs.89499  | ALOX5        | 1 | 1 | 1 | 0 | 0 | 0 | 1 |
| Hs.89560  | IDUA         | 1 | 1 | 1 | 0 | 0 | 0 | 1 |
| Hs.91142  | KHSRP        | 1 | 1 | 1 | 0 | 0 | 1 | 1 |
| Hs.91625  | DPP10        | 1 | 1 | 1 | 0 | 0 | 0 | 1 |
| Hs.94308  | RAB35        | 1 | 1 | 1 | 0 | 0 | 1 | 1 |
| Hs.95196  | MGC3162      | 1 | 1 | 1 | 0 | 0 | 1 | 1 |
| Hs.100217 | FMNL1        | 1 | 0 | 0 | 1 | 0 | 1 | 2 |
| Hs.102456 | SIP1         | 1 | 0 | 0 | 1 | 0 | 1 | 2 |
| Hs.1027   | RRAD         | 1 | 0 | 0 | 1 | 0 | 0 | 2 |

|           |               |   |   |   |   |   |   |   |
|-----------|---------------|---|---|---|---|---|---|---|
| Hs.10441  | NFYA          | 1 | 0 | 0 | 1 | 0 | 1 | 2 |
| Hs.104576 | CHST1         | 1 | 0 | 0 | 1 | 1 | 1 | 2 |
| Hs.104624 | AQP9          | 1 | 0 | 0 | 1 | 0 | 1 | 2 |
| Hs.104746 | EPB41L4A      | 1 | 0 | 0 | 1 | 0 | 1 | 2 |
| Hs.105460 | DKFZP564O0823 | 1 | 0 | 0 | 1 | 0 | 1 | 2 |
| Hs.105633 | WINS1         | 1 | 0 | 0 | 1 | 1 | 0 | 2 |
| Hs.105751 | SLK           | 1 | 0 | 0 | 1 | 0 | 1 | 2 |
| Hs.107056 | GULP1         | 1 | 0 | 0 | 1 | 0 | 0 | 2 |
| Hs.107740 | KLF2          | 1 | 0 | 0 | 1 | 0 | 0 | 2 |
| Hs.108183 | ING4          | 1 | 0 | 0 | 1 | 0 | 1 | 2 |
| Hs.108371 | E2F4          | 1 | 0 | 0 | 1 | 0 | 1 | 2 |
| Hs.108636 | C1orf9        | 1 | 0 | 0 | 1 | 0 | 1 | 2 |
| Hs.108966 | PIP5K2A       | 1 | 0 | 0 | 1 | 0 | 1 | 2 |
| Hs.109999 | ITGB1BP2      | 1 | 0 | 0 | 1 | 0 | 1 | 2 |
| Hs.111244 | DDIT4         | 1 | 0 | 0 | 1 | 0 | 1 | 2 |
| Hs.11169  | MIG-6         | 1 | 0 | 0 | 1 | 0 | 0 | 2 |
| Hs.112377 | CTXL          | 1 | 0 | 0 | 1 | 0 | 1 | 2 |
| Hs.112605 | DKFZP564O043  | 1 | 0 | 0 | 1 | 1 | 0 | 2 |
| Hs.112619 | PCP2          | 1 | 0 | 0 | 1 | 0 | 1 | 2 |
| Hs.112667 | DNAI1         | 1 | 0 | 0 | 1 | 0 | 1 | 2 |
| Hs.112669 | FABP3         | 1 | 0 | 0 | 1 | 0 | 1 | 2 |
| Hs.114412 | TXNL          | 1 | 0 | 0 | 1 | 0 | 1 | 2 |
| Hs.11449  | DKFZP564O123  | 1 | 0 | 0 | 1 | 1 | 1 | 2 |
| Hs.116651 | EVA1          | 1 | 0 | 0 | 1 | 0 | 1 | 2 |
| Hs.117852 | ABCD2         | 1 | 0 | 0 | 1 | 0 | 1 | 2 |
| Hs.118194 | DBR1          | 1 | 0 | 0 | 1 | 0 | 0 | 2 |
| Hs.118625 | HK1           | 1 | 0 | 0 | 1 | 0 | 1 | 2 |
| Hs.119023 | SMC2L1        | 1 | 0 | 0 | 1 | 0 | 1 | 2 |
| Hs.119651 | GPC3          | 1 | 0 | 0 | 1 | 1 | 1 | 2 |
| Hs.119908 | NOP5/NOP58    | 1 | 0 | 0 | 1 | 0 | 1 | 2 |
| Hs.1227   | ALAD          | 1 | 0 | 0 | 1 | 0 | 1 | 2 |
| Hs.123647 | KIN           | 1 | 0 | 0 | 1 | 0 | 0 | 2 |
| Hs.12457  | NUP133        | 1 | 0 | 0 | 1 | 1 | 0 | 2 |
| Hs.125457 | REC14         | 1 | 0 | 0 | 1 | 0 | 1 | 2 |
| Hs.125742 | LRRN4         | 1 | 0 | 0 | 1 | 0 | 1 | 2 |
| Hs.126384 | FCGR2B        | 1 | 0 | 0 | 1 | 0 | 1 | 2 |
| Hs.127196 | GPR155        | 1 | 0 | 0 | 1 | 0 | 1 | 2 |
| Hs.127216 | MMRN2         | 1 | 0 | 0 | 1 | 0 | 0 | 2 |
| Hs.1276   | POLR3D        | 1 | 0 | 0 | 1 | 0 | 1 | 2 |
| Hs.12808  | MARK1         | 1 | 0 | 0 | 1 | 0 | 0 | 2 |
| Hs.12815  | HARC          | 1 | 0 | 0 | 1 | 0 | 1 | 2 |
| Hs.12820  | USP39         | 1 | 0 | 0 | 1 | 0 | 1 | 2 |
| Hs.128410 | GLS           | 1 | 0 | 0 | 1 | 1 | 0 | 2 |
| Hs.129614 | NX17          | 1 | 0 | 0 | 1 | 0 | 0 | 2 |
| Hs.129683 | UBE2D1        | 1 | 0 | 0 | 1 | 0 | 1 | 2 |
| Hs.129836 | CDK11         | 1 | 0 | 0 | 1 | 0 | 1 | 2 |
| Hs.129903 | POLL          | 1 | 0 | 0 | 1 | 0 | 1 | 2 |

|           |          |   |   |   |   |   |   |   |
|-----------|----------|---|---|---|---|---|---|---|
| Hs.129951 | SPOP     | 1 | 0 | 0 | 1 | 0 | 1 | 2 |
| Hs.129959 | IL17RC   | 1 | 0 | 0 | 1 | 0 | 1 | 2 |
| Hs.129    | CCKAR    | 1 | 0 | 0 | 1 | 1 | 1 | 2 |
| Hs.131315 | BAL      | 1 | 0 | 0 | 1 | 0 | 0 | 2 |
| Hs.13144  | ORMDL2   | 1 | 0 | 0 | 1 | 0 | 1 | 2 |
| Hs.132753 | FBXO2    | 1 | 0 | 0 | 1 | 1 | 1 | 2 |
| Hs.132799 | FLJ23451 | 1 | 0 | 0 | 1 | 0 | 1 | 2 |
| Hs.133234 | PPP2R3A  | 1 | 0 | 0 | 1 | 0 | 1 | 2 |
| Hs.135146 | FLJ13984 | 1 | 0 | 0 | 1 | 1 | 1 | 2 |
| Hs.135254 | THSD2    | 1 | 0 | 0 | 1 | 0 | 0 | 2 |
| Hs.135890 | PHF12    | 1 | 0 | 0 | 1 | 0 | 1 | 2 |
| Hs.136164 | SE20-4   | 1 | 0 | 0 | 1 | 0 | 1 | 2 |
| Hs.1361   | CYP1A2   | 1 | 0 | 0 | 1 | 0 | 1 | 2 |
| Hs.14144  | SMOC1    | 1 | 0 | 0 | 1 | 1 | 0 | 2 |
| Hs.1422   | FGR      | 1 | 0 | 0 | 1 | 0 | 1 | 2 |
| Hs.143873 | S100A10  | 1 | 0 | 0 | 1 | 1 | 1 | 2 |
| Hs.144906 | METAP2   | 1 | 0 | 0 | 1 | 1 | 0 | 2 |
| Hs.14606  | PALMD    | 1 | 0 | 0 | 1 | 0 | 0 | 2 |
| Hs.146286 | KIF13A   | 1 | 0 | 0 | 1 | 1 | 0 | 2 |
| Hs.146406 | NIT1     | 1 | 0 | 0 | 1 | 0 | 1 | 2 |
| Hs.147465 | HOXB3    | 1 | 0 | 0 | 1 | 1 | 1 | 2 |
| Hs.147871 | CACNA2D1 | 1 | 0 | 0 | 1 | 1 | 0 | 2 |
| Hs.149443 | 101F6    | 1 | 0 | 0 | 1 | 0 | 1 | 2 |
| Hs.1498   | HRG      | 1 | 0 | 0 | 1 | 0 | 1 | 2 |
| Hs.150011 | ETV1     | 1 | 0 | 0 | 1 | 0 | 1 | 2 |
| Hs.150358 | DPYSL3   | 1 | 0 | 0 | 1 | 0 | 1 | 2 |
| Hs.150458 | FLJ14494 | 1 | 0 | 0 | 1 | 0 | 0 | 2 |
| Hs.150956 | EXTL1    | 1 | 0 | 0 | 1 | 1 | 0 | 2 |
| Hs.151134 | OXA1L    | 1 | 0 | 0 | 1 | 0 | 1 | 2 |
| Hs.1516   | IGFBP4   | 1 | 0 | 0 | 1 | 0 | 0 | 2 |
| Hs.151710 | PDE6A    | 1 | 0 | 0 | 1 | 0 | 1 | 2 |
| Hs.151787 | U5-116KD | 1 | 0 | 0 | 1 | 0 | 0 | 2 |
| Hs.152531 | HAND1    | 1 | 0 | 0 | 1 | 0 | 1 | 2 |
| Hs.153260 | SH3KBP1  | 1 | 0 | 0 | 1 | 0 | 1 | 2 |
| Hs.153961 | ACTR1A   | 1 | 0 | 0 | 1 | 0 | 1 | 2 |
| Hs.154095 | JDP2     | 1 | 0 | 0 | 1 | 0 | 1 | 2 |
| Hs.154295 | SP3      | 1 | 0 | 0 | 1 | 1 | 0 | 2 |
| Hs.155165 | ZFPL1    | 1 | 0 | 0 | 1 | 1 | 1 | 2 |
| Hs.155185 | COVA1    | 1 | 0 | 0 | 1 | 0 | 0 | 2 |
| Hs.155223 | STC2     | 1 | 0 | 0 | 1 | 0 | 0 | 2 |
| Hs.155418 | TRB2     | 1 | 0 | 0 | 1 | 0 | 1 | 2 |
| Hs.155433 | ATP5C1   | 1 | 0 | 0 | 1 | 0 | 0 | 2 |
| Hs.155597 | DF       | 1 | 0 | 0 | 1 | 0 | 0 | 2 |
| Hs.155718 | RNF130   | 1 | 0 | 0 | 1 | 0 | 0 | 2 |
| Hs.155983 | JMJD2A   | 1 | 0 | 0 | 1 | 0 | 1 | 2 |
| Hs.156114 | PTPNS1   | 1 | 0 | 0 | 1 | 1 | 0 | 2 |
| Hs.156316 | DCN      | 1 | 0 | 0 | 1 | 0 | 1 | 2 |

|           |          |   |   |   |   |   |   |   |
|-----------|----------|---|---|---|---|---|---|---|
| Hs.157433 | GJA8     | 1 | 0 | 0 | 1 | 0 | 0 | 2 |
| Hs.158351 | GALR2    | 1 | 0 | 0 | 1 | 0 | 1 | 2 |
| Hs.158462 | SLC12A3  | 1 | 0 | 0 | 1 | 0 | 0 | 2 |
| Hs.159087 | RAD23B   | 1 | 0 | 0 | 1 | 0 | 1 | 2 |
| Hs.159494 | BTK      | 1 | 0 | 0 | 1 | 0 | 1 | 2 |
| Hs.1614   | CHRNA5   | 1 | 0 | 0 | 1 | 0 | 1 | 2 |
| Hs.162757 | LRP1     | 1 | 0 | 0 | 1 | 1 | 0 | 2 |
| Hs.16297  | POPDC2   | 1 | 0 | 0 | 1 | 1 | 1 | 2 |
| Hs.1634   | CDC25A   | 1 | 0 | 0 | 1 | 0 | 1 | 2 |
| Hs.1650   | SLC26A3  | 1 | 0 | 0 | 1 | 1 | 1 | 2 |
| Hs.165598 | PON2     | 1 | 0 | 0 | 1 | 0 | 0 | 2 |
| Hs.165725 | CNOT2    | 1 | 0 | 0 | 1 | 0 | 1 | 2 |
| Hs.16606  | CGI-32   | 1 | 0 | 0 | 1 | 0 | 1 | 2 |
| Hs.166109 | ELAVL2   | 1 | 0 | 0 | 1 | 1 | 1 | 2 |
| Hs.166204 | PHF1     | 1 | 0 | 0 | 1 | 0 | 1 | 2 |
| Hs.167584 | SLC2A2   | 1 | 0 | 0 | 1 | 0 | 1 | 2 |
| Hs.169294 | TCF7     | 1 | 0 | 0 | 1 | 0 | 1 | 2 |
| Hs.169744 | G22P1    | 1 | 0 | 0 | 1 | 0 | 1 | 2 |
| Hs.169946 | GATA3    | 1 | 0 | 0 | 1 | 1 | 0 | 2 |
| Hs.170184 | PCNP     | 1 | 0 | 0 | 1 | 0 | 0 | 2 |
| Hs.170318 | ESRRBL1  | 1 | 0 | 0 | 1 | 1 | 1 | 2 |
| Hs.1708   | CCT3     | 1 | 0 | 0 | 1 | 0 | 1 | 2 |
| Hs.171880 | POLR2A   | 1 | 0 | 0 | 1 | 1 | 1 | 2 |
| Hs.173001 | KIAA1221 | 1 | 0 | 0 | 1 | 1 | 1 | 2 |
| Hs.173162 | NOC4     | 1 | 0 | 0 | 1 | 0 | 1 | 2 |
| Hs.173508 | LCN7     | 1 | 0 | 0 | 1 | 0 | 1 | 2 |
| Hs.173933 | NFIA     | 1 | 0 | 0 | 1 | 0 | 1 | 2 |
| Hs.174103 | ITGAL    | 1 | 0 | 0 | 1 | 0 | 1 | 2 |
| Hs.17546  | C11orf1  | 1 | 0 | 0 | 1 | 0 | 1 | 2 |
| Hs.178499 | HSPC063  | 1 | 0 | 0 | 1 | 1 | 1 | 2 |
| Hs.178695 | MAPK13   | 1 | 0 | 0 | 1 | 0 | 0 | 2 |
| Hs.179522 | SLC2A8   | 1 | 0 | 0 | 1 | 0 | 1 | 2 |
| Hs.180394 | SRP14    | 1 | 0 | 0 | 1 | 0 | 1 | 2 |
| Hs.180612 | PXMP3    | 1 | 0 | 0 | 1 | 0 | 1 | 2 |
| Hs.180919 | ID2      | 1 | 0 | 0 | 1 | 0 | 1 | 2 |
| Hs.181418 | KIAA0152 | 1 | 0 | 0 | 1 | 0 | 1 | 2 |
| Hs.182018 | IRAK1    | 1 | 0 | 0 | 1 | 0 | 1 | 2 |
| Hs.182469 | WASL     | 1 | 0 | 0 | 1 | 0 | 1 | 2 |
| Hs.183075 | ATP2A1   | 1 | 0 | 0 | 1 | 0 | 1 | 2 |
| Hs.183109 | MAOA     | 1 | 0 | 0 | 1 | 0 | 1 | 2 |
| Hs.183123 | NR5A2    | 1 | 0 | 0 | 1 | 1 | 1 | 2 |
| Hs.184945 | GBX2     | 1 | 0 | 0 | 1 | 0 | 0 | 2 |
| Hs.185084 | MSI2     | 1 | 0 | 0 | 1 | 0 | 1 | 2 |
| Hs.187338 | MYL1     | 1 | 0 | 0 | 1 | 0 | 1 | 2 |
| Hs.18799  | FLOT2    | 1 | 0 | 0 | 1 | 0 | 1 | 2 |
| Hs.188    | PDE4B    | 1 | 0 | 0 | 1 | 1 | 1 | 2 |
| Hs.18925  | LOC51185 | 1 | 0 | 0 | 1 | 1 | 1 | 2 |



|           |          |   |   |   |   |   |   |   |
|-----------|----------|---|---|---|---|---|---|---|
| Hs.190162 | FLJ32112 | 1 | 0 | 0 | 1 | 1 | 1 | 2 |
| Hs.1908   | PRG1     | 1 | 0 | 0 | 1 | 0 | 1 | 2 |
| Hs.191341 | FLJ22955 | 1 | 0 | 0 | 1 | 0 | 1 | 2 |
| Hs.193261 | FKRP     | 1 | 0 | 0 | 1 | 0 | 1 | 2 |
| Hs.1937   | RDS      | 1 | 0 | 0 | 1 | 0 | 1 | 2 |
| Hs.194035 | C14orf92 | 1 | 0 | 0 | 1 | 0 | 1 | 2 |
| Hs.194301 | MAP1A    | 1 | 0 | 0 | 1 | 0 | 1 | 2 |
| Hs.194662 | CNN3     | 1 | 0 | 0 | 1 | 0 | 0 | 2 |
| Hs.194679 | WISP2    | 1 | 0 | 0 | 1 | 1 | 1 | 2 |
| Hs.194783 | SLC10A2  | 1 | 0 | 0 | 1 | 0 | 1 | 2 |
| Hs.196470 | KIAA1005 | 1 | 0 | 0 | 1 | 0 | 1 | 2 |
| Hs.196669 | EBP      | 1 | 0 | 0 | 1 | 1 | 1 | 2 |
| Hs.1973   | CCNF     | 1 | 0 | 0 | 1 | 0 | 1 | 2 |
| Hs.1976   | PDGFB    | 1 | 0 | 0 | 1 | 1 | 0 | 2 |
| Hs.198288 | PTPRR    | 1 | 0 | 0 | 1 | 0 | 1 | 2 |
| Hs.199750 | SLCO5A1  | 1 | 0 | 0 | 1 | 1 | 1 | 2 |
| Hs.200738 | SLC38A6  | 1 | 0 | 0 | 1 | 1 | 1 | 2 |
| Hs.20191  | SIAH2    | 1 | 0 | 0 | 1 | 0 | 1 | 2 |
| Hs.202453 | MYC      | 1 | 0 | 0 | 1 | 1 | 1 | 2 |
| Hs.203581 | DDX54    | 1 | 0 | 0 | 1 | 0 | 0 | 2 |
| Hs.203    | CCKBR    | 1 | 0 | 0 | 1 | 0 | 1 | 2 |
| Hs.2053   | TYR      | 1 | 0 | 0 | 1 | 0 | 0 | 2 |
| Hs.20716  | TIMM17A  | 1 | 0 | 0 | 1 | 0 | 1 | 2 |
| Hs.208680 | COG4     | 1 | 0 | 0 | 1 | 0 | 1 | 2 |
| Hs.20977  | GDAP1L1  | 1 | 0 | 0 | 1 | 0 | 1 | 2 |
| Hs.211573 | HSPG2    | 1 | 0 | 0 | 1 | 0 | 1 | 2 |
| Hs.211601 | MAP3K12  | 1 | 0 | 0 | 1 | 0 | 1 | 2 |
| Hs.21413  | SLC12A5  | 1 | 0 | 0 | 1 | 1 | 1 | 2 |
| Hs.21431  | SUFU     | 1 | 0 | 0 | 1 | 0 | 1 | 2 |
| Hs.21486  | STAT1    | 1 | 0 | 0 | 1 | 0 | 1 | 2 |
| Hs.21858  | SERPINE2 | 1 | 0 | 0 | 1 | 0 | 1 | 2 |
| Hs.221974 | SNAP25   | 1 | 0 | 0 | 1 | 0 | 1 | 2 |
| Hs.22399  | RAB2B    | 1 | 0 | 0 | 1 | 0 | 1 | 2 |
| Hs.22412  | C2orf17  | 1 | 0 | 0 | 1 | 0 | 1 | 2 |
| Hs.224171 | ENO3     | 1 | 0 | 0 | 1 | 0 | 1 | 2 |
| Hs.2257   | VTN      | 1 | 0 | 0 | 1 | 0 | 0 | 2 |
| Hs.225952 | PTPRT    | 1 | 0 | 0 | 1 | 0 | 1 | 2 |
| Hs.226581 | COX15    | 1 | 0 | 0 | 1 | 0 | 1 | 2 |
| Hs.227277 | SIX3     | 1 | 0 | 0 | 1 | 0 | 1 | 2 |
| Hs.227729 | FKBP2    | 1 | 0 | 0 | 1 | 1 | 0 | 2 |
| Hs.22857  | CHORDC1  | 1 | 0 | 0 | 1 | 0 | 0 | 2 |
| Hs.22926  | KIAA0795 | 1 | 0 | 0 | 1 | 0 | 1 | 2 |
| Hs.231883 | FLJ10826 | 1 | 0 | 0 | 1 | 1 | 1 | 2 |
| Hs.232432 | LAMP2    | 1 | 0 | 0 | 1 | 0 | 1 | 2 |
| Hs.233936 | MRCL3    | 1 | 0 | 0 | 1 | 0 | 1 | 2 |
| Hs.234521 | MAPKAPK3 | 1 | 0 | 0 | 1 | 0 | 0 | 2 |
| Hs.234759 | FEV      | 1 | 0 | 0 | 1 | 0 | 1 | 2 |

|           |           |   |   |   |   |   |   |   |
|-----------|-----------|---|---|---|---|---|---|---|
| Hs.2353   | OPRM1     | 1 | 0 | 0 | 1 | 0 | 1 | 2 |
| Hs.235860 | FOXP1     | 1 | 0 | 0 | 1 | 1 | 1 | 2 |
| Hs.236646 | HOXD9     | 1 | 0 | 0 | 1 | 0 | 1 | 2 |
| Hs.237480 | SLC35A5   | 1 | 0 | 0 | 1 | 0 | 1 | 2 |
| Hs.239176 | IGF1R     | 1 | 0 | 0 | 1 | 0 | 0 | 2 |
| Hs.23918  | AVP11     | 1 | 0 | 0 | 1 | 0 | 1 | 2 |
| Hs.24088  | FLJ20125  | 1 | 0 | 0 | 1 | 0 | 1 | 2 |
| Hs.2411   | P2RY1     | 1 | 0 | 0 | 1 | 0 | 0 | 2 |
| Hs.2420   | SOD3      | 1 | 0 | 0 | 1 | 0 | 0 | 2 |
| Hs.247868 | TRPC5     | 1 | 0 | 0 | 1 | 0 | 1 | 2 |
| Hs.249955 | PPP2R5C   | 1 | 0 | 0 | 1 | 1 | 1 | 2 |
| Hs.25155  | NET1      | 1 | 0 | 0 | 1 | 0 | 1 | 2 |
| Hs.25328  | PHC3      | 1 | 0 | 0 | 1 | 0 | 1 | 2 |
| Hs.254321 | CTNNA1    | 1 | 0 | 0 | 1 | 0 | 0 | 2 |
| Hs.25590  | STC1      | 1 | 0 | 0 | 1 | 0 | 1 | 2 |
| Hs.256184 | EEF1G     | 1 | 0 | 0 | 1 | 1 | 1 | 2 |
| Hs.256297 | ITGA11    | 1 | 0 | 0 | 1 | 0 | 0 | 2 |
| Hs.257486 | FTSJ3     | 1 | 0 | 0 | 1 | 1 | 1 | 2 |
| Hs.259605 | FLJ20477  | 1 | 0 | 0 | 1 | 0 | 1 | 2 |
| Hs.25960  | MYCN      | 1 | 0 | 0 | 1 | 0 | 0 | 2 |
| Hs.26179  | KIAA0433  | 1 | 0 | 0 | 1 | 0 | 1 | 2 |
| Hs.26208  | COL16A1   | 1 | 0 | 0 | 1 | 0 | 1 | 2 |
| Hs.26440  | TPCN1     | 1 | 0 | 0 | 1 | 1 | 0 | 2 |
| Hs.267819 | PPP1R2    | 1 | 0 | 0 | 1 | 0 | 0 | 2 |
| Hs.268122 | LOC51321  | 1 | 0 | 0 | 1 | 1 | 1 | 2 |
| Hs.268849 | GLO1      | 1 | 0 | 0 | 1 | 0 | 1 | 2 |
| Hs.270845 | KIF23     | 1 | 0 | 0 | 1 | 0 | 0 | 2 |
| Hs.2719   | WFDC2     | 1 | 0 | 0 | 1 | 0 | 0 | 2 |
| Hs.272813 | DUOX1     | 1 | 0 | 0 | 1 | 0 | 1 | 2 |
| Hs.272848 | FLJ21019  | 1 | 0 | 0 | 1 | 1 | 1 | 2 |
| Hs.273397 | USP52     | 1 | 0 | 0 | 1 | 0 | 0 | 2 |
| Hs.274293 | UGT8      | 1 | 0 | 0 | 1 | 0 | 1 | 2 |
| Hs.276916 | NR1D1     | 1 | 0 | 0 | 1 | 1 | 0 | 2 |
| Hs.27695  | MID1      | 1 | 0 | 0 | 1 | 1 | 1 | 2 |
| Hs.279177 | LOC115811 | 1 | 0 | 0 | 1 | 1 | 0 | 2 |
| Hs.279474 | MKRN2     | 1 | 0 | 0 | 1 | 0 | 0 | 2 |
| Hs.279583 | DREV1     | 1 | 0 | 0 | 1 | 0 | 0 | 2 |
| Hs.279609 | MTCH2     | 1 | 0 | 0 | 1 | 0 | 0 | 2 |
| Hs.279766 | KIF4A     | 1 | 0 | 0 | 1 | 0 | 1 | 2 |
| Hs.279901 | TRAPPC4   | 1 | 0 | 0 | 1 | 0 | 0 | 2 |
| Hs.279908 | TFB1M     | 1 | 0 | 0 | 1 | 1 | 0 | 2 |
| Hs.2799   | HAPLN1    | 1 | 0 | 0 | 1 | 0 | 1 | 2 |
| Hs.28005  | TGFBR1    | 1 | 0 | 0 | 1 | 0 | 0 | 2 |
| Hs.280226 | APOB      | 1 | 0 | 0 | 1 | 0 | 0 | 2 |
| Hs.280305 | EHZF      | 1 | 0 | 0 | 1 | 0 | 1 | 2 |
| Hs.28070  | KIAA0753  | 1 | 0 | 0 | 1 | 0 | 1 | 2 |
| Hs.281564 | ROM1      | 1 | 0 | 0 | 1 | 1 | 1 | 2 |

|           |           |   |   |   |   |   |   |   |
|-----------|-----------|---|---|---|---|---|---|---|
| Hs.282079 | MIXL1     | 1 | 0 | 0 | 1 | 0 | 1 | 2 |
| Hs.282326 | DSCR1     | 1 | 0 | 0 | 1 | 0 | 1 | 2 |
| Hs.28249  | HCA127    | 1 | 0 | 0 | 1 | 0 | 1 | 2 |
| Hs.282557 | CP        | 1 | 0 | 0 | 1 | 0 | 1 | 2 |
| Hs.283021 | CLIC5     | 1 | 0 | 0 | 1 | 0 | 0 | 2 |
| Hs.28346  | GCM1      | 1 | 0 | 0 | 1 | 0 | 1 | 2 |
| Hs.283610 | APG4B     | 1 | 0 | 0 | 1 | 0 | 0 | 2 |
| Hs.283764 | FBXO24    | 1 | 0 | 0 | 1 | 0 | 1 | 2 |
| Hs.284250 | AD-003    | 1 | 0 | 0 | 1 | 0 | 1 | 2 |
| Hs.284279 | HMOX2     | 1 | 0 | 0 | 1 | 1 | 0 | 2 |
| Hs.28482  | PDE4D     | 1 | 0 | 0 | 1 | 0 | 0 | 2 |
| Hs.28491  | SAT       | 1 | 0 | 0 | 1 | 1 | 0 | 2 |
| Hs.288224 | MRPL50    | 1 | 0 | 0 | 1 | 1 | 0 | 2 |
| Hs.288382 | FLJ13111  | 1 | 0 | 0 | 1 | 0 | 0 | 2 |
| Hs.288959 | FLJ20920  | 1 | 0 | 0 | 1 | 0 | 1 | 2 |
| Hs.288981 | C14orf127 | 1 | 0 | 0 | 1 | 0 | 1 | 2 |
| Hs.289292 | FOXL2     | 1 | 0 | 0 | 1 | 0 | 1 | 2 |
| Hs.291070 | PIP5K2B   | 1 | 0 | 0 | 1 | 0 | 0 | 2 |
| Hs.291385 | ATP8A1    | 1 | 0 | 0 | 1 | 1 | 1 | 2 |
| Hs.293970 | ALDH6A1   | 1 | 0 | 0 | 1 | 0 | 1 | 2 |
| Hs.296341 | CAP2      | 1 | 0 | 0 | 1 | 1 | 1 | 2 |
| Hs.297559 | C21orf66  | 1 | 0 | 0 | 1 | 0 | 0 | 2 |
| Hs.297792 | FLJ23091  | 1 | 0 | 0 | 1 | 0 | 1 | 2 |
| Hs.298229 | PFDN2     | 1 | 0 | 0 | 1 | 0 | 1 | 2 |
| Hs.298654 | DUSP6     | 1 | 0 | 0 | 1 | 1 | 0 | 2 |
| Hs.299208 | COQ3      | 1 | 0 | 0 | 1 | 0 | 0 | 2 |
| Hs.30054  | F5        | 1 | 0 | 0 | 1 | 0 | 1 | 2 |
| Hs.301865 | DCT       | 1 | 0 | 0 | 1 | 0 | 1 | 2 |
| Hs.302352 | GABRB3    | 1 | 0 | 0 | 1 | 0 | 0 | 2 |
| Hs.30332  | GFPT2     | 1 | 0 | 0 | 1 | 0 | 0 | 2 |
| Hs.306213 | HIVEP3    | 1 | 0 | 0 | 1 | 1 | 1 | 2 |
| Hs.308053 | IGF1      | 1 | 0 | 0 | 1 | 0 | 0 | 2 |
| Hs.30942  | EFNB2     | 1 | 0 | 0 | 1 | 1 | 0 | 2 |
| Hs.310542 | TOMM40    | 1 | 0 | 0 | 1 | 1 | 1 | 2 |
| Hs.315186 | PCSK2     | 1 | 0 | 0 | 1 | 0 | 0 | 2 |
| Hs.315379 | WSB1      | 1 | 0 | 0 | 1 | 0 | 1 | 2 |
| Hs.31547  | NDUFA8    | 1 | 0 | 0 | 1 | 0 | 1 | 2 |
| Hs.31714  | WDR8      | 1 | 0 | 0 | 1 | 0 | 0 | 2 |
| Hs.31845  | ASB7      | 1 | 0 | 0 | 1 | 1 | 0 | 2 |
| Hs.318603 | MARCKS    | 1 | 0 | 0 | 1 | 1 | 0 | 2 |
| Hs.32148  | SELS      | 1 | 0 | 0 | 1 | 0 | 0 | 2 |
| Hs.321687 | FBX30     | 1 | 0 | 0 | 1 | 1 | 1 | 2 |
| Hs.322431 | NEUROD2   | 1 | 0 | 0 | 1 | 0 | 1 | 2 |
| Hs.323489 | FLJ20758  | 1 | 0 | 0 | 1 | 1 | 1 | 2 |
| Hs.324521 | DC50      | 1 | 0 | 0 | 1 | 0 | 1 | 2 |
| Hs.32990  | DPCD      | 1 | 0 | 0 | 1 | 0 | 1 | 2 |
| Hs.33102  | TFAP2B    | 1 | 0 | 0 | 1 | 0 | 1 | 2 |

|           |             |   |   |   |   |   |   |   |
|-----------|-------------|---|---|---|---|---|---|---|
| Hs.333131 | TEX12       | 1 | 0 | 0 | 1 | 0 | 1 | 2 |
| Hs.333417 | CAPZB       | 1 | 0 | 0 | 1 | 0 | 0 | 2 |
| Hs.334684 | MGC10485    | 1 | 0 | 0 | 1 | 0 | 0 | 2 |
| Hs.334713 | BMSC-UbP    | 1 | 0 | 0 | 1 | 1 | 1 | 2 |
| Hs.334832 | CYB5R1      | 1 | 0 | 0 | 1 | 0 | 0 | 2 |
| Hs.334875 | BBAP        | 1 | 0 | 0 | 1 | 0 | 0 | 2 |
| Hs.337242 | CENTB1      | 1 | 0 | 0 | 1 | 0 | 1 | 2 |
| Hs.340959 | TSFM        | 1 | 0 | 0 | 1 | 1 | 1 | 2 |
| Hs.34114  | ATP1A2      | 1 | 0 | 0 | 1 | 1 | 0 | 2 |
| Hs.343173 | C14orf111   | 1 | 0 | 0 | 1 | 0 | 1 | 2 |
| Hs.3439   | STOML2      | 1 | 0 | 0 | 1 | 0 | 0 | 2 |
| Hs.344488 | LOC150356   | 1 | 0 | 0 | 1 | 0 | 1 | 2 |
| Hs.345058 | SETDB1      | 1 | 0 | 0 | 1 | 0 | 0 | 2 |
| Hs.347408 | MGC13102    | 1 | 0 | 0 | 1 | 0 | 1 | 2 |
| Hs.347713 | FLT1        | 1 | 0 | 0 | 1 | 1 | 1 | 2 |
| Hs.347991 | NR2F2       | 1 | 0 | 0 | 1 | 0 | 1 | 2 |
| Hs.348262 | KLHL13      | 1 | 0 | 0 | 1 | 0 | 1 | 2 |
| Hs.348436 | DSC1        | 1 | 0 | 0 | 1 | 0 | 1 | 2 |
| Hs.349109 | IGF2        | 1 | 0 | 0 | 1 | 0 | 0 | 2 |
| Hs.349470 | SNCG        | 1 | 0 | 0 | 1 | 0 | 0 | 2 |
| Hs.349845 | PRKCB1      | 1 | 0 | 0 | 1 | 0 | 1 | 2 |
| Hs.350702 | NIFU        | 1 | 0 | 0 | 1 | 0 | 1 | 2 |
| Hs.351327 | COMMD4      | 1 | 0 | 0 | 1 | 0 | 0 | 2 |
| Hs.356573 | FLJ12525    | 1 | 0 | 0 | 1 | 0 | 0 | 2 |
| Hs.356664 | FLJ32334    | 1 | 0 | 0 | 1 | 0 | 1 | 2 |
| Hs.356729 | OK/SW-cl.56 | 1 | 0 | 0 | 1 | 0 | 0 | 2 |
| Hs.356742 | DRAP1       | 1 | 0 | 0 | 1 | 0 | 1 | 2 |
| Hs.359289 | TCF4        | 1 | 0 | 0 | 1 | 0 | 1 | 2 |
| Hs.365689 | IGSF4B      | 1 | 0 | 0 | 1 | 1 | 1 | 2 |
| Hs.365863 | SEC10L1     | 1 | 0 | 0 | 1 | 0 | 0 | 2 |
| Hs.368178 | RHAG        | 1 | 0 | 0 | 1 | 0 | 1 | 2 |
| Hs.369063 | ZIC2        | 1 | 0 | 0 | 1 | 0 | 0 | 2 |
| Hs.369099 | PAX1        | 1 | 0 | 0 | 1 | 1 | 0 | 2 |
| Hs.370123 | AP2B1       | 1 | 0 | 0 | 1 | 0 | 0 | 2 |
| Hs.37034  | HOXA5       | 1 | 0 | 0 | 1 | 0 | 0 | 2 |
| Hs.370530 | TRIM14      | 1 | 0 | 0 | 1 | 0 | 0 | 2 |
| Hs.370937 | TAPBP       | 1 | 0 | 0 | 1 | 0 | 1 | 2 |
| Hs.371369 | SLC1A3      | 1 | 0 | 0 | 1 | 0 | 1 | 2 |
| Hs.372170 | AKR1A1      | 1 | 0 | 0 | 1 | 0 | 0 | 2 |
| Hs.372758 | UBE2H       | 1 | 0 | 0 | 1 | 0 | 1 | 2 |
| Hs.374499 | PSMA6       | 1 | 0 | 0 | 1 | 1 | 1 | 2 |
| Hs.375025 | DNAJC14     | 1 | 0 | 0 | 1 | 0 | 1 | 2 |
| Hs.377070 | GRIA3       | 1 | 0 | 0 | 1 | 0 | 1 | 2 |
| Hs.377416 | ELMO3       | 1 | 0 | 0 | 1 | 0 | 1 | 2 |
| Hs.377593 | MGC3169     | 1 | 0 | 0 | 1 | 1 | 0 | 2 |
| Hs.377783 | ADCYAP1R1   | 1 | 0 | 0 | 1 | 0 | 0 | 2 |
| Hs.378063 | APBB1       | 1 | 0 | 0 | 1 | 0 | 0 | 2 |

|           |           |   |   |   |   |   |   |   |
|-----------|-----------|---|---|---|---|---|---|---|
| Hs.379785 | FLJ35827  | 1 | 0 | 0 | 1 | 1 | 1 | 2 |
| Hs.379972 | MGC33214  | 1 | 0 | 0 | 1 | 0 | 1 | 2 |
| Hs.380994 | ARID4A    | 1 | 0 | 0 | 1 | 0 | 1 | 2 |
| Hs.3833   | PAPSS1    | 1 | 0 | 0 | 1 | 1 | 0 | 2 |
| Hs.3844   | LMO4      | 1 | 0 | 0 | 1 | 0 | 1 | 2 |
| Hs.385865 | MGC64882  | 1 | 0 | 0 | 1 | 0 | 0 | 2 |
| Hs.385890 | PIGL      | 1 | 0 | 0 | 1 | 0 | 1 | 2 |
| Hs.386205 | MTM1      | 1 | 0 | 0 | 1 | 0 | 1 | 2 |
| Hs.38628  | LOC55954  | 1 | 0 | 0 | 1 | 0 | 1 | 2 |
| Hs.388004 | AHCY      | 1 | 0 | 0 | 1 | 0 | 0 | 2 |
| Hs.388034 | RXRB      | 1 | 0 | 0 | 1 | 1 | 0 | 2 |
| Hs.388613 | NEO1      | 1 | 0 | 0 | 1 | 0 | 0 | 2 |
| Hs.388645 | MGC14288  | 1 | 0 | 0 | 1 | 1 | 1 | 2 |
| Hs.389037 | MCM3AP    | 1 | 0 | 0 | 1 | 1 | 0 | 2 |
| Hs.389103 | GLP1R     | 1 | 0 | 0 | 1 | 0 | 0 | 2 |
| Hs.396798 | B4GALT1   | 1 | 0 | 0 | 1 | 1 | 0 | 2 |
| Hs.399981 | C20orf178 | 1 | 0 | 0 | 1 | 1 | 1 | 2 |
| Hs.400460 | CACNA1A   | 1 | 0 | 0 | 1 | 0 | 0 | 2 |
| Hs.4014   | HIP14     | 1 | 0 | 0 | 1 | 0 | 0 | 2 |
| Hs.405880 | MRPS21    | 1 | 0 | 0 | 1 | 0 | 1 | 2 |
| Hs.405917 | FLJ10707  | 1 | 0 | 0 | 1 | 0 | 1 | 2 |
| Hs.405945 | ZNF410    | 1 | 0 | 0 | 1 | 0 | 0 | 2 |
| Hs.406096 | ZNF216    | 1 | 0 | 0 | 1 | 1 | 1 | 2 |
| Hs.40637  | PRRG1     | 1 | 0 | 0 | 1 | 0 | 1 | 2 |
| Hs.406696 | PRND      | 1 | 0 | 0 | 1 | 0 | 0 | 2 |
| Hs.407015 | DLX1      | 1 | 0 | 0 | 1 | 0 | 0 | 2 |
| Hs.407546 | TNFAIP6   | 1 | 0 | 0 | 1 | 1 | 1 | 2 |
| Hs.407860 | NDUFC2    | 1 | 0 | 0 | 1 | 0 | 1 | 2 |
| Hs.408238 | SART3     | 1 | 0 | 0 | 1 | 0 | 1 | 2 |
| Hs.409546 | ARHGAP5   | 1 | 0 | 0 | 1 | 0 | 0 | 2 |
| Hs.410597 | CIP29     | 1 | 0 | 0 | 1 | 0 | 1 | 2 |
| Hs.411509 | GSTP1     | 1 | 0 | 0 | 1 | 0 | 0 | 2 |
| Hs.412327 | SATB2     | 1 | 0 | 0 | 1 | 0 | 0 | 2 |
| Hs.412587 | RAD51C    | 1 | 0 | 0 | 1 | 1 | 1 | 2 |
| Hs.413518 | FLJ13096  | 1 | 0 | 0 | 1 | 1 | 1 | 2 |
| Hs.413678 | MGC20398  | 1 | 0 | 0 | 1 | 0 | 1 | 2 |
| Hs.414471 | SLC31A1   | 1 | 0 | 0 | 1 | 0 | 1 | 2 |
| Hs.414473 | C6orf110  | 1 | 0 | 0 | 1 | 0 | 0 | 2 |
| Hs.414952 | LOC51057  | 1 | 0 | 0 | 1 | 1 | 1 | 2 |
| Hs.415766 | ZIC4      | 1 | 0 | 0 | 1 | 0 | 0 | 2 |
| Hs.415768 | NGFR      | 1 | 0 | 0 | 1 | 1 | 0 | 2 |
| Hs.415796 | PSKH1     | 1 | 0 | 0 | 1 | 0 | 0 | 2 |
| Hs.416061 | PDE1A     | 1 | 0 | 0 | 1 | 0 | 0 | 2 |
| Hs.416495 | C1orf8    | 1 | 0 | 0 | 1 | 1 | 1 | 2 |
| Hs.416959 | HGS       | 1 | 0 | 0 | 1 | 0 | 0 | 2 |
| Hs.417962 | DUSP4     | 1 | 0 | 0 | 1 | 0 | 1 | 2 |
| Hs.418138 | FN1       | 1 | 0 | 0 | 1 | 1 | 0 | 2 |

|           |           |   |   |   |   |   |   |   |
|-----------|-----------|---|---|---|---|---|---|---|
| Hs.418692 | P8        | 1 | 0 | 0 | 1 | 0 | 0 | 2 |
| Hs.420036 | GAD1      | 1 | 0 | 0 | 1 | 0 | 1 | 2 |
| Hs.420322 | KEL       | 1 | 0 | 0 | 1 | 0 | 1 | 2 |
| Hs.421136 | HOXD11    | 1 | 0 | 0 | 1 | 0 | 1 | 2 |
| Hs.421848 | MRPL43    | 1 | 0 | 0 | 1 | 0 | 1 | 2 |
| Hs.422181 | S100B     | 1 | 0 | 0 | 1 | 1 | 0 | 2 |
| Hs.424414 | MSX1      | 1 | 0 | 0 | 1 | 1 | 1 | 2 |
| Hs.424559 | SMC6L1    | 1 | 0 | 0 | 1 | 1 | 1 | 2 |
| Hs.424619 | PDCD10    | 1 | 0 | 0 | 1 | 0 | 0 | 2 |
| Hs.424908 | LSM5      | 1 | 0 | 0 | 1 | 0 | 1 | 2 |
| Hs.425633 | CKMT1     | 1 | 0 | 0 | 1 | 0 | 1 | 2 |
| Hs.428344 | WDR7      | 1 | 0 | 0 | 1 | 1 | 1 | 2 |
| Hs.429492 | MGC24976  | 1 | 0 | 0 | 1 | 1 | 1 | 2 |
| Hs.430166 | PLS3      | 1 | 0 | 0 | 1 | 0 | 0 | 2 |
| Hs.43141  | LOC284058 | 1 | 0 | 0 | 1 | 1 | 1 | 2 |
| Hs.432121 | PRDX2     | 1 | 0 | 0 | 1 | 1 | 1 | 2 |
| Hs.432750 | HPN       | 1 | 0 | 0 | 1 | 1 | 1 | 2 |
| Hs.432832 | DNM2      | 1 | 0 | 0 | 1 | 1 | 0 | 2 |
| Hs.432997 | FLJ21977  | 1 | 0 | 0 | 1 | 0 | 1 | 2 |
| Hs.433402 | CFDP1     | 1 | 0 | 0 | 1 | 0 | 0 | 2 |
| Hs.433419 | COX4I1    | 1 | 0 | 0 | 1 | 0 | 1 | 2 |
| Hs.433442 | KIFAP3    | 1 | 0 | 0 | 1 | 1 | 1 | 2 |
| Hs.433512 | ACTR3     | 1 | 0 | 0 | 1 | 0 | 1 | 2 |
| Hs.433573 | P5326     | 1 | 0 | 0 | 1 | 0 | 1 | 2 |
| Hs.433652 | PPP1R3F   | 1 | 0 | 0 | 1 | 0 | 1 | 2 |
| Hs.433680 | TG        | 1 | 0 | 0 | 1 | 1 | 1 | 2 |
| Hs.433871 | KRT13     | 1 | 0 | 0 | 1 | 1 | 1 | 2 |
| Hs.433892 | AP2M1     | 1 | 0 | 0 | 1 | 0 | 0 | 2 |
| Hs.433982 | SDHC      | 1 | 0 | 0 | 1 | 1 | 1 | 2 |
| Hs.434118 | C20orf133 | 1 | 0 | 0 | 1 | 1 | 0 | 2 |
| Hs.434432 | KIAA0317  | 1 | 0 | 0 | 1 | 0 | 1 | 2 |
| Hs.434886 | CDCA5     | 1 | 0 | 0 | 1 | 1 | 1 | 2 |
| Hs.434979 | EST1B     | 1 | 0 | 0 | 1 | 0 | 1 | 2 |
| Hs.434992 | STAT5B    | 1 | 0 | 0 | 1 | 0 | 0 | 2 |
| Hs.43505  | IKBKG     | 1 | 0 | 0 | 1 | 0 | 0 | 2 |
| Hs.435689 | ALDH1A2   | 1 | 0 | 0 | 1 | 0 | 0 | 2 |
| Hs.435786 | CACNB2    | 1 | 0 | 0 | 1 | 0 | 1 | 2 |
| Hs.435976 | BRUNOL4   | 1 | 0 | 0 | 1 | 0 | 1 | 2 |
| Hs.436096 | C6orf130  | 1 | 0 | 0 | 1 | 0 | 1 | 2 |
| Hs.436301 | CSPG4     | 1 | 0 | 0 | 1 | 0 | 0 | 2 |
| Hs.436317 | CYP4B1    | 1 | 0 | 0 | 1 | 0 | 1 | 2 |
| Hs.436325 | KIF5A     | 1 | 0 | 0 | 1 | 0 | 1 | 2 |
| Hs.436596 | RNF41     | 1 | 0 | 0 | 1 | 0 | 1 | 2 |
| Hs.436708 | KLF7      | 1 | 0 | 0 | 1 | 0 | 0 | 2 |
| Hs.436871 | TRIM26    | 1 | 0 | 0 | 1 | 0 | 0 | 2 |
| Hs.436873 | ITGAV     | 1 | 0 | 0 | 1 | 1 | 1 | 2 |
| Hs.436983 | LAMB3     | 1 | 0 | 0 | 1 | 0 | 1 | 2 |

|           |          |   |   |   |   |   |   |   |
|-----------|----------|---|---|---|---|---|---|---|
| Hs.436986 | CBLB     | 1 | 0 | 0 | 1 | 1 | 1 | 2 |
| Hs.436988 | COX11    | 1 | 0 | 0 | 1 | 0 | 1 | 2 |
| Hs.437083 | TUSC4    | 1 | 0 | 0 | 1 | 0 | 0 | 2 |
| Hs.437808 | MATK     | 1 | 0 | 0 | 1 | 1 | 1 | 2 |
| Hs.437922 | MYCL1    | 1 | 0 | 0 | 1 | 0 | 1 | 2 |
| Hs.438533 | POLI     | 1 | 0 | 0 | 1 | 0 | 0 | 2 |
| Hs.438550 | KIAA0056 | 1 | 0 | 0 | 1 | 0 | 0 | 2 |
| Hs.438582 | PRNP     | 1 | 0 | 0 | 1 | 0 | 0 | 2 |
| Hs.438588 | CNNM2    | 1 | 0 | 0 | 1 | 0 | 1 | 2 |
| Hs.438993 | BCAT1    | 1 | 0 | 0 | 1 | 0 | 0 | 2 |
| Hs.439114 | ORC4L    | 1 | 0 | 0 | 1 | 0 | 1 | 2 |
| Hs.439168 | COL11A1  | 1 | 0 | 0 | 1 | 0 | 1 | 2 |
| Hs.440478 | ANK3     | 1 | 0 | 0 | 1 | 1 | 1 | 2 |
| Hs.440734 | ATRX     | 1 | 0 | 0 | 1 | 1 | 1 | 2 |
| Hs.441028 | USP47    | 1 | 0 | 0 | 1 | 1 | 1 | 2 |
| Hs.441047 | ADM      | 1 | 0 | 0 | 1 | 1 | 0 | 2 |
| Hs.442590 | SLC6A9   | 1 | 0 | 0 | 1 | 1 | 0 | 2 |
| Hs.442669 | GLUL     | 1 | 0 | 0 | 1 | 0 | 1 | 2 |
| Hs.44276  | HOXC10   | 1 | 0 | 0 | 1 | 0 | 1 | 2 |
| Hs.443163 | DC6      | 1 | 0 | 0 | 1 | 0 | 1 | 2 |
| Hs.443727 | LHX1     | 1 | 0 | 0 | 1 | 1 | 0 | 2 |
| Hs.443836 | CNP      | 1 | 0 | 0 | 1 | 0 | 1 | 2 |
| Hs.444324 | PTPRC    | 1 | 0 | 0 | 1 | 1 | 1 | 2 |
| Hs.444762 | TEX14    | 1 | 0 | 0 | 1 | 1 | 1 | 2 |
| Hs.444846 | LOC55831 | 1 | 0 | 0 | 1 | 0 | 1 | 2 |
| Hs.445503 | SYN2     | 1 | 0 | 0 | 1 | 0 | 1 | 2 |
| Hs.446126 | PTPN2    | 1 | 0 | 0 | 1 | 0 | 0 | 2 |
| Hs.446393 | CPSF5    | 1 | 0 | 0 | 1 | 1 | 1 | 2 |
| Hs.446481 | DNAJC7   | 1 | 0 | 0 | 1 | 0 | 1 | 2 |
| Hs.446484 | CSNK2A1  | 1 | 0 | 0 | 1 | 0 | 1 | 2 |
| Hs.446623 | HNRPL    | 1 | 0 | 0 | 1 | 0 | 0 | 2 |
| Hs.446645 | KDEL2    | 1 | 0 | 0 | 1 | 0 | 1 | 2 |
| Hs.447513 | SMAP     | 1 | 0 | 0 | 1 | 1 | 1 | 2 |
| Hs.447877 | TIMM8A   | 1 | 0 | 0 | 1 | 0 | 1 | 2 |
| Hs.458291 | PKD2     | 1 | 0 | 0 | 1 | 0 | 1 | 2 |
| Hs.47166  | HT021    | 1 | 0 | 0 | 1 | 0 | 1 | 2 |
| Hs.477    | HSD17B3  | 1 | 0 | 0 | 1 | 0 | 0 | 2 |
| Hs.479    | RAB5C    | 1 | 0 | 0 | 1 | 0 | 1 | 2 |
| Hs.4854   | CDKN2C   | 1 | 0 | 0 | 1 | 0 | 1 | 2 |
| Hs.4866   | SLC26A11 | 1 | 0 | 0 | 1 | 1 | 1 | 2 |
| Hs.492245 | DLEU7    | 1 | 0 | 0 | 1 | 0 | 0 | 2 |
| Hs.4973   | CGI-57   | 1 | 0 | 0 | 1 | 0 | 1 | 2 |
| Hs.50002  | CCL19    | 1 | 0 | 0 | 1 | 0 | 0 | 2 |
| Hs.50123  | ZNF189   | 1 | 0 | 0 | 1 | 1 | 0 | 2 |
| Hs.505    | ISL1     | 1 | 0 | 0 | 1 | 0 | 0 | 2 |
| Hs.5085   | DPM1     | 1 | 0 | 0 | 1 | 1 | 1 | 2 |
| Hs.50924  | GATA6    | 1 | 0 | 0 | 1 | 0 | 0 | 2 |

|           |           |   |   |   |   |   |   |   |
|-----------|-----------|---|---|---|---|---|---|---|
| Hs.509746 | RUNX2     | 1 | 0 | 0 | 1 | 0 | 1 | 2 |
| Hs.511400 | SND1      | 1 | 0 | 0 | 1 | 0 | 1 | 2 |
| Hs.511620 | PRKAG2    | 1 | 0 | 0 | 1 | 0 | 0 | 2 |
| Hs.511904 | EIF4A2    | 1 | 0 | 0 | 1 | 0 | 1 | 2 |
| Hs.511996 | D15Wsu75e | 1 | 0 | 0 | 1 | 0 | 1 | 2 |
| Hs.512145 | GRM3      | 1 | 0 | 0 | 1 | 0 | 1 | 2 |
| Hs.512585 | MLLT7     | 1 | 0 | 0 | 1 | 1 | 1 | 2 |
| Hs.512605 | PDE1B     | 1 | 0 | 0 | 1 | 1 | 0 | 2 |
| Hs.512622 | FLJ20309  | 1 | 0 | 0 | 1 | 1 | 0 | 2 |
| Hs.512648 | AGPAT4    | 1 | 0 | 0 | 1 | 0 | 1 | 2 |
| Hs.512669 | LY6G5B    | 1 | 0 | 0 | 1 | 0 | 1 | 2 |
| Hs.512676 | RPS25     | 1 | 0 | 0 | 1 | 0 | 0 | 2 |
| Hs.512787 | COL25A1   | 1 | 0 | 0 | 1 | 1 | 0 | 2 |
| Hs.514276 | SP2       | 1 | 0 | 0 | 1 | 0 | 0 | 2 |
| Hs.519057 | NPY1R     | 1 | 0 | 0 | 1 | 0 | 0 | 2 |
| Hs.5198   | DSCR2     | 1 | 0 | 0 | 1 | 0 | 1 | 2 |
| Hs.51     | PIGA      | 1 | 0 | 0 | 1 | 0 | 0 | 2 |
| Hs.5215   | ITGB4BP   | 1 | 0 | 0 | 1 | 0 | 1 | 2 |
| Hs.5216   | BZW2      | 1 | 0 | 0 | 1 | 1 | 0 | 2 |
| Hs.525862 | GLUD2     | 1 | 0 | 0 | 1 | 0 | 1 | 2 |
| Hs.528308 | HRASLS3   | 1 | 0 | 0 | 1 | 1 | 0 | 2 |
| Hs.528504 | LOC388695 | 1 | 0 | 0 | 1 | 0 | 1 | 2 |
| Hs.528629 | LSAMP     | 1 | 0 | 0 | 1 | 0 | 0 | 2 |
| Hs.528641 | SIRT7     | 1 | 0 | 0 | 1 | 0 | 1 | 2 |
| Hs.528653 | C14orf108 | 1 | 0 | 0 | 1 | 0 | 0 | 2 |
| Hs.528663 | OPN1LW    | 1 | 0 | 0 | 1 | 0 | 0 | 2 |
| Hs.53973  | VIP       | 1 | 0 | 0 | 1 | 0 | 1 | 2 |
| Hs.54413  | SMYD5     | 1 | 0 | 0 | 1 | 0 | 1 | 2 |
| Hs.54457  | CD81      | 1 | 0 | 0 | 1 | 0 | 1 | 2 |
| Hs.55847  | MRPL51    | 1 | 0 | 0 | 1 | 1 | 0 | 2 |
| Hs.5719   | CNAP1     | 1 | 0 | 0 | 1 | 1 | 0 | 2 |
| Hs.57301  | HMGA1     | 1 | 0 | 0 | 1 | 0 | 0 | 2 |
| Hs.58362  | FLJ12681  | 1 | 0 | 0 | 1 | 0 | 0 | 2 |
| Hs.58831  | TOSO      | 1 | 0 | 0 | 1 | 0 | 1 | 2 |
| Hs.61469  | CXorf9    | 1 | 0 | 0 | 1 | 0 | 1 | 2 |
| Hs.63304  | PME-1     | 1 | 0 | 0 | 1 | 1 | 1 | 2 |
| Hs.63984  | CDH13     | 1 | 0 | 0 | 1 | 0 | 0 | 2 |
| Hs.64025  | BNC       | 1 | 0 | 0 | 1 | 1 | 1 | 2 |
| Hs.640    | CALCR     | 1 | 0 | 0 | 1 | 0 | 1 | 2 |
| Hs.6510   | TRHDE     | 1 | 0 | 0 | 1 | 0 | 1 | 2 |
| Hs.652    | TNFSF5    | 1 | 0 | 0 | 1 | 1 | 1 | 2 |
| Hs.6607   | AXUD1     | 1 | 0 | 0 | 1 | 1 | 0 | 2 |
| Hs.6671   | COPS4     | 1 | 0 | 0 | 1 | 0 | 0 | 2 |
| Hs.6831   | ACBD3     | 1 | 0 | 0 | 1 | 0 | 0 | 2 |
| Hs.6994   | LOC200933 | 1 | 0 | 0 | 1 | 0 | 0 | 2 |
| Hs.7235   | CACNG3    | 1 | 0 | 0 | 1 | 0 | 0 | 2 |
| Hs.724    | THRA      | 1 | 0 | 0 | 1 | 0 | 1 | 2 |



|          |          |   |   |   |   |   |   |   |
|----------|----------|---|---|---|---|---|---|---|
| Hs.73064 | GNRHR    | 1 | 0 | 0 | 1 | 0 | 0 | 2 |
| Hs.73072 | CCT6B    | 1 | 0 | 0 | 1 | 0 | 1 | 2 |
| Hs.73454 | TNNT3    | 1 | 0 | 0 | 1 | 0 | 1 | 2 |
| Hs.73962 | EPHA7    | 1 | 0 | 0 | 1 | 1 | 1 | 2 |
| Hs.74471 | GJA1     | 1 | 0 | 0 | 1 | 0 | 1 | 2 |
| Hs.74561 | A2M      | 1 | 0 | 0 | 1 | 0 | 0 | 2 |
| Hs.74617 | DCTN1    | 1 | 0 | 0 | 1 | 0 | 0 | 2 |
| Hs.75137 | SCRN1    | 1 | 0 | 0 | 1 | 0 | 1 | 2 |
| Hs.75254 | IRF3     | 1 | 0 | 0 | 1 | 1 | 1 | 2 |
| Hs.75445 | SPARCL1  | 1 | 0 | 0 | 1 | 0 | 1 | 2 |
| Hs.75498 | CCL20    | 1 | 0 | 0 | 1 | 1 | 1 | 2 |
| Hs.75512 | NEDD8    | 1 | 0 | 0 | 1 | 0 | 1 | 2 |
| Hs.75760 | SCP2     | 1 | 0 | 0 | 1 | 0 | 0 | 2 |
| Hs.76556 | PPP1R15A | 1 | 0 | 0 | 1 | 0 | 1 | 2 |
| Hs.767   | GHRHR    | 1 | 0 | 0 | 1 | 1 | 1 | 2 |
| Hs.76930 | SNCA     | 1 | 0 | 0 | 1 | 0 | 1 | 2 |
| Hs.77274 | PLAU     | 1 | 0 | 0 | 1 | 1 | 1 | 2 |
| Hs.77293 | SERTAD2  | 1 | 0 | 0 | 1 | 0 | 0 | 2 |
| Hs.77318 | PAFAH1B1 | 1 | 0 | 0 | 1 | 1 | 1 | 2 |
| Hs.77424 | FCGR1A   | 1 | 0 | 0 | 1 | 0 | 1 | 2 |
| Hs.7744  | NDUFV1   | 1 | 0 | 0 | 1 | 0 | 1 | 2 |
| Hs.77858 | MEOX2    | 1 | 0 | 0 | 1 | 0 | 1 | 2 |
| Hs.78061 | TCF21    | 1 | 0 | 0 | 1 | 0 | 0 | 2 |
| Hs.78221 | MYCBP    | 1 | 0 | 0 | 1 | 0 | 1 | 2 |
| Hs.78589 | SERPINI1 | 1 | 0 | 0 | 1 | 0 | 0 | 2 |
| Hs.78788 | LZTR1    | 1 | 0 | 0 | 1 | 0 | 1 | 2 |
| Hs.78885 | BTD      | 1 | 0 | 0 | 1 | 1 | 1 | 2 |
| Hs.78977 | PCSK1    | 1 | 0 | 0 | 1 | 0 | 1 | 2 |
| Hs.79088 | RCN2     | 1 | 0 | 0 | 1 | 0 | 1 | 2 |
| Hs.79101 | CCNG1    | 1 | 0 | 0 | 1 | 0 | 1 | 2 |
| Hs.79110 | NCL      | 1 | 0 | 0 | 1 | 0 | 0 | 2 |
| Hs.79347 | ZNF592   | 1 | 0 | 0 | 1 | 0 | 0 | 2 |
| Hs.79886 | RPIA     | 1 | 0 | 0 | 1 | 0 | 1 | 2 |
| Hs.80296 | PCP4     | 1 | 0 | 0 | 1 | 0 | 0 | 2 |
| Hs.80420 | CCL22    | 1 | 0 | 0 | 1 | 0 | 1 | 2 |
| Hs.82163 | MAOB     | 1 | 0 | 0 | 1 | 1 | 0 | 2 |
| Hs.82240 | STX3A    | 1 | 0 | 0 | 1 | 0 | 1 | 2 |
| Hs.82280 | RGS10    | 1 | 0 | 0 | 1 | 0 | 0 | 2 |
| Hs.82399 | COG2     | 1 | 0 | 0 | 1 | 0 | 0 | 2 |
| Hs.8258  | C19orf13 | 1 | 0 | 0 | 1 | 0 | 1 | 2 |
| Hs.82890 | DAD1     | 1 | 0 | 0 | 1 | 1 | 1 | 2 |
| Hs.83916 | NDUFA5   | 1 | 0 | 0 | 1 | 1 | 1 | 2 |
| Hs.83919 | GCS1     | 1 | 0 | 0 | 1 | 0 | 0 | 2 |
| Hs.83942 | CTSK     | 1 | 0 | 0 | 1 | 0 | 1 | 2 |
| Hs.84154 | NPTX1    | 1 | 0 | 0 | 1 | 1 | 0 | 2 |
| Hs.84673 | TNNI1    | 1 | 0 | 0 | 1 | 0 | 1 | 2 |
| Hs.85137 | CCNA2    | 1 | 0 | 0 | 1 | 0 | 1 | 2 |

|           |               |   |   |   |   |   |   |   |
|-----------|---------------|---|---|---|---|---|---|---|
| Hs.85195  | MLF1          | 1 | 0 | 0 | 1 | 1 | 0 | 2 |
| Hs.86088  | IMP-1         | 1 | 0 | 0 | 1 | 0 | 0 | 2 |
| Hs.8619   | SOX18         | 1 | 0 | 0 | 1 | 1 | 0 | 2 |
| Hs.87889  | DICER1        | 1 | 0 | 0 | 1 | 0 | 0 | 2 |
| Hs.88523  | C13orf3       | 1 | 0 | 0 | 1 | 0 | 1 | 2 |
| Hs.8852   | ZA20D1        | 1 | 0 | 0 | 1 | 0 | 0 | 2 |
| Hs.89506  | PAX6          | 1 | 0 | 0 | 1 | 0 | 1 | 2 |
| Hs.89626  | PTHLH         | 1 | 0 | 0 | 1 | 0 | 1 | 2 |
| Hs.89627  | PTPRG         | 1 | 0 | 0 | 1 | 0 | 1 | 2 |
| Hs.89663  | CYP24A1       | 1 | 0 | 0 | 1 | 0 | 0 | 2 |
| Hs.89768  | GABRB1        | 1 | 0 | 0 | 1 | 1 | 1 | 2 |
| Hs.89791  | WNT2          | 1 | 0 | 0 | 1 | 1 | 1 | 2 |
| Hs.89983  | MASP1         | 1 | 0 | 0 | 1 | 0 | 1 | 2 |
| Hs.90005  | STMN2         | 1 | 0 | 0 | 1 | 0 | 1 | 2 |
| Hs.90527  | HSPC128       | 1 | 0 | 0 | 1 | 1 | 0 | 2 |
| Hs.9088   | MGC3200       | 1 | 0 | 0 | 1 | 0 | 1 | 2 |
| Hs.91586  | TM9SF1        | 1 | 0 | 0 | 1 | 1 | 1 | 2 |
| Hs.94030  | CD109         | 1 | 0 | 0 | 1 | 1 | 1 | 2 |
| Hs.94367  | TITF1         | 1 | 0 | 0 | 1 | 0 | 0 | 2 |
| Hs.9469   | PLEKHA4       | 1 | 0 | 0 | 1 | 0 | 1 | 2 |
| Hs.94810  | FLJ12242      | 1 | 0 | 0 | 1 | 0 | 1 | 2 |
| Hs.9589   | UBQLN1        | 1 | 0 | 0 | 1 | 0 | 1 | 2 |
| Hs.96023  | CD19          | 1 | 0 | 0 | 1 | 0 | 0 | 2 |
| Hs.96028  | FOXD1         | 1 | 0 | 0 | 1 | 0 | 0 | 2 |
| Hs.97128  | ZNF207        | 1 | 0 | 0 | 1 | 0 | 0 | 2 |
| Hs.9880   | PPIH          | 1 | 0 | 0 | 1 | 0 | 0 | 2 |
| Hs.99884  | ADPRH         | 1 | 0 | 0 | 1 | 0 | 1 | 2 |
| Hs.101382 | TNFAIP2       | 1 | 0 | 0 | 0 | 1 | 1 | 3 |
| Hs.101915 | ELOVL4        | 1 | 0 | 0 | 0 | 1 | 1 | 3 |
| Hs.103291 | NRN1          | 1 | 0 | 0 | 0 | 1 | 1 | 3 |
| Hs.107600 | NEFL          | 1 | 0 | 0 | 0 | 1 | 1 | 3 |
| Hs.115617 | CRHBP         | 1 | 0 | 0 | 0 | 1 | 1 | 3 |
| Hs.120247 | NUFIP1        | 1 | 0 | 0 | 0 | 1 | 1 | 3 |
| Hs.124030 | ELF1          | 1 | 0 | 0 | 0 | 1 | 1 | 3 |
| Hs.124512 | MGC34741      | 1 | 0 | 0 | 0 | 1 | 1 | 3 |
| Hs.12813  | TIPARP        | 1 | 0 | 0 | 0 | 1 | 1 | 3 |
| Hs.131555 | ENTPD5        | 1 | 0 | 0 | 0 | 1 | 1 | 3 |
| Hs.131834 | LOC118987     | 1 | 0 | 0 | 0 | 1 | 1 | 3 |
| Hs.134406 | FLJ20511      | 1 | 0 | 0 | 0 | 1 | 1 | 3 |
| Hs.134643 | THY1          | 1 | 0 | 0 | 0 | 1 | 1 | 3 |
| Hs.147259 | ABCA1         | 1 | 0 | 0 | 0 | 1 | 1 | 3 |
| Hs.154729 | PDPK1         | 1 | 0 | 0 | 0 | 1 | 1 | 3 |
| Hs.155218 | E1B-AP5       | 1 | 0 | 0 | 0 | 1 | 1 | 3 |
| Hs.157236 | VAT1          | 1 | 0 | 0 | 0 | 1 | 1 | 3 |
| Hs.159068 | DKFZP586M1120 | 1 | 0 | 0 | 0 | 1 | 1 | 3 |
| Hs.167017 | GABBR1        | 1 | 0 | 0 | 0 | 1 | 1 | 3 |
| Hs.169331 | SCN5A         | 1 | 0 | 0 | 0 | 1 | 1 | 3 |

|           |           |   |   |   |   |   |   |   |
|-----------|-----------|---|---|---|---|---|---|---|
| Hs.1722   | IL1A      | 1 | 0 | 0 | 0 | 1 | 1 | 3 |
| Hs.181300 | SEL1L     | 1 | 0 | 0 | 0 | 1 | 1 | 3 |
| Hs.18271  | GOLPH3    | 1 | 0 | 0 | 0 | 1 | 1 | 3 |
| Hs.184877 | SLC25A11  | 1 | 0 | 0 | 0 | 1 | 1 | 3 |
| Hs.201375 | WDR3      | 1 | 0 | 0 | 0 | 1 | 1 | 3 |
| Hs.202279 | FBXO36    | 1 | 0 | 0 | 0 | 1 | 1 | 3 |
| Hs.205952 | LOC201895 | 1 | 0 | 0 | 0 | 1 | 1 | 3 |
| Hs.209561 | KIAA1715  | 1 | 0 | 0 | 0 | 1 | 1 | 3 |
| Hs.210343 | LRP6      | 1 | 0 | 0 | 0 | 1 | 1 | 3 |
| Hs.2288   | VSNL1     | 1 | 0 | 0 | 0 | 1 | 1 | 3 |
| Hs.232004 | NRGN      | 1 | 0 | 0 | 0 | 1 | 1 | 3 |
| Hs.234763 | NKX2-8    | 1 | 0 | 0 | 0 | 1 | 1 | 3 |
| Hs.243960 | NDRG2     | 1 | 0 | 0 | 0 | 1 | 1 | 3 |
| Hs.250173 | C6orf134  | 1 | 0 | 0 | 0 | 1 | 1 | 3 |
| Hs.26471  | BBS4      | 1 | 0 | 0 | 0 | 1 | 1 | 3 |
| Hs.274264 | VSX1      | 1 | 0 | 0 | 0 | 1 | 1 | 3 |
| Hs.279522 | NR4A3     | 1 | 0 | 0 | 0 | 1 | 1 | 3 |
| Hs.28020  | EPM2AIP1  | 1 | 0 | 0 | 0 | 1 | 1 | 3 |
| Hs.283709 | KIAA1704  | 1 | 0 | 0 | 0 | 1 | 1 | 3 |
| Hs.285133 | NFYC      | 1 | 0 | 0 | 0 | 1 | 1 | 3 |
| Hs.28607  | LOC57149  | 1 | 0 | 0 | 0 | 1 | 1 | 3 |
| Hs.288945 | FLJ13448  | 1 | 0 | 0 | 0 | 1 | 1 | 3 |
| Hs.29493  | GDAP2     | 1 | 0 | 0 | 0 | 1 | 1 | 3 |
| Hs.303901 | C14orf119 | 1 | 0 | 0 | 0 | 1 | 1 | 3 |
| Hs.304134 | CARS      | 1 | 0 | 0 | 0 | 1 | 1 | 3 |
| Hs.308709 | GRP58     | 1 | 0 | 0 | 0 | 1 | 1 | 3 |
| Hs.311559 | NOTCH1    | 1 | 0 | 0 | 0 | 1 | 1 | 3 |
| Hs.31664  | FZD10     | 1 | 0 | 0 | 0 | 1 | 1 | 3 |
| Hs.323813 | LRSAM1    | 1 | 0 | 0 | 0 | 1 | 1 | 3 |
| Hs.34871  | ZFHX1B    | 1 | 0 | 0 | 0 | 1 | 1 | 3 |
| Hs.351279 | HLA-DMA   | 1 | 0 | 0 | 0 | 1 | 1 | 3 |
| Hs.356076 | BIRC4     | 1 | 0 | 0 | 0 | 1 | 1 | 3 |
| Hs.367646 | BM-002    | 1 | 0 | 0 | 0 | 1 | 1 | 3 |
| Hs.370688 | TOMM70A   | 1 | 0 | 0 | 0 | 1 | 1 | 3 |
| Hs.375628 | TOM1L2    | 1 | 0 | 0 | 0 | 1 | 1 | 3 |
| Hs.376071 | CCND2     | 1 | 0 | 0 | 0 | 1 | 1 | 3 |
| Hs.381008 | HLA-E     | 1 | 0 | 0 | 0 | 1 | 1 | 3 |
| Hs.404336 | LOC92906  | 1 | 0 | 0 | 0 | 1 | 1 | 3 |
| Hs.406243 | NUPL1     | 1 | 0 | 0 | 0 | 1 | 1 | 3 |
| Hs.407520 | CHN2      | 1 | 0 | 0 | 0 | 1 | 1 | 3 |
| Hs.408054 | RPL12     | 1 | 0 | 0 | 0 | 1 | 1 | 3 |
| Hs.41749  | PRKG2     | 1 | 0 | 0 | 0 | 1 | 1 | 3 |
| Hs.424907 | MGC35366  | 1 | 0 | 0 | 0 | 1 | 1 | 3 |
| Hs.42957  | METTL1    | 1 | 0 | 0 | 0 | 1 | 1 | 3 |
| Hs.433103 | CASP2     | 1 | 0 | 0 | 0 | 1 | 1 | 3 |
| Hs.433618 | MLH1      | 1 | 0 | 0 | 0 | 1 | 1 | 3 |
| Hs.434433 | GOLGA4    | 1 | 0 | 0 | 0 | 1 | 1 | 3 |

|           |               |   |   |   |   |   |   |   |
|-----------|---------------|---|---|---|---|---|---|---|
| Hs.435483 | GLIS2         | 1 | 0 | 0 | 0 | 1 | 1 | 3 |
| Hs.43566  | CGI-125       | 1 | 0 | 0 | 0 | 1 | 1 | 3 |
| Hs.437546 | SMARCE1       | 1 | 0 | 0 | 0 | 1 | 1 | 3 |
| Hs.438767 | RAI17         | 1 | 0 | 0 | 0 | 1 | 1 | 3 |
| Hs.439188 | KIAA0261      | 1 | 0 | 0 | 0 | 1 | 1 | 3 |
| Hs.440638 | CAMK4         | 1 | 0 | 0 | 0 | 1 | 1 | 3 |
| Hs.441109 | PXF           | 1 | 0 | 0 | 0 | 1 | 1 | 3 |
| Hs.443240 | FLJ12716      | 1 | 0 | 0 | 0 | 1 | 1 | 3 |
| Hs.444086 | SRF           | 1 | 0 | 0 | 0 | 1 | 1 | 3 |
| Hs.445201 | L1CAM         | 1 | 0 | 0 | 0 | 1 | 1 | 3 |
| Hs.446369 | MAGI-3        | 1 | 0 | 0 | 0 | 1 | 1 | 3 |
| Hs.447968 | GJA5          | 1 | 0 | 0 | 0 | 1 | 1 | 3 |
| Hs.458270 | LMX1A         | 1 | 0 | 0 | 0 | 1 | 1 | 3 |
| Hs.4788   | NCSTN         | 1 | 0 | 0 | 0 | 1 | 1 | 3 |
| Hs.511739 | UBA2          | 1 | 0 | 0 | 0 | 1 | 1 | 3 |
| Hs.511915 | ENO2          | 1 | 0 | 0 | 0 | 1 | 1 | 3 |
| Hs.528668 | RPL6          | 1 | 0 | 0 | 0 | 1 | 1 | 3 |
| Hs.55235  | SMPD2         | 1 | 0 | 0 | 0 | 1 | 1 | 3 |
| Hs.606    | ATP7A         | 1 | 0 | 0 | 0 | 1 | 1 | 3 |
| Hs.67397  | HOXA1         | 1 | 0 | 0 | 0 | 1 | 1 | 3 |
| Hs.7158   | DKFZP566H073  | 1 | 0 | 0 | 0 | 1 | 1 | 3 |
| Hs.76550  | MAL2          | 1 | 0 | 0 | 0 | 1 | 1 | 3 |
| Hs.80409  | GADD45A       | 1 | 0 | 0 | 0 | 1 | 1 | 3 |
| Hs.83293  | ANKIB1        | 1 | 0 | 0 | 0 | 1 | 1 | 3 |
| Hs.845    | IL13          | 1 | 0 | 0 | 0 | 1 | 1 | 3 |
| Hs.89545  | PSMB4         | 1 | 0 | 0 | 0 | 1 | 1 | 3 |
| Hs.9676   | THEM2         | 1 | 0 | 0 | 0 | 1 | 1 | 3 |
| Hs.97905  | OVOL1         | 1 | 0 | 0 | 0 | 1 | 1 | 3 |
| Hs.10101  | FLJ12875      | 1 | 0 | 0 | 0 | 1 | 0 | 3 |
| Hs.102506 | EIF2AK3       | 1 | 0 | 0 | 0 | 1 | 0 | 3 |
| Hs.104555 | NPFF          | 1 | 0 | 0 | 0 | 1 | 0 | 3 |
| Hs.106880 | BYSL          | 1 | 0 | 0 | 0 | 1 | 0 | 3 |
| Hs.110299 | MAP2K7        | 1 | 0 | 0 | 0 | 1 | 0 | 3 |
| Hs.116481 | CD72          | 1 | 0 | 0 | 0 | 1 | 0 | 3 |
| Hs.118127 | ACTC          | 1 | 0 | 0 | 0 | 1 | 0 | 3 |
| Hs.120573 | DKFZP434K1172 | 1 | 0 | 0 | 0 | 1 | 0 | 3 |
| Hs.12677  | CGI-147       | 1 | 0 | 0 | 0 | 1 | 0 | 3 |
| Hs.131956 | H1F5          | 1 | 0 | 0 | 0 | 1 | 0 | 3 |
| Hs.132380 | FA2H          | 1 | 0 | 0 | 0 | 1 | 0 | 3 |
| Hs.13285  | KCNV1         | 1 | 0 | 0 | 0 | 1 | 0 | 3 |
| Hs.139851 | CAV2          | 1 | 0 | 0 | 0 | 1 | 0 | 3 |
| Hs.144700 | EFNB1         | 1 | 0 | 0 | 0 | 1 | 0 | 3 |
| Hs.16079  | FLJ10233      | 1 | 0 | 0 | 0 | 1 | 0 | 3 |
| Hs.162967 | BRAF          | 1 | 0 | 0 | 0 | 1 | 0 | 3 |
| Hs.166254 | VMP1          | 1 | 0 | 0 | 0 | 1 | 0 | 3 |
| Hs.186547 | KIAA1374      | 1 | 0 | 0 | 0 | 1 | 0 | 3 |
| Hs.194208 | FRS3          | 1 | 0 | 0 | 0 | 1 | 0 | 3 |

|           |          |   |   |   |   |   |   |   |
|-----------|----------|---|---|---|---|---|---|---|
| Hs.211610 | CUGBP2   | 1 | 0 | 0 | 0 | 1 | 0 | 3 |
| Hs.211823 | EIF4EL3  | 1 | 0 | 0 | 0 | 1 | 0 | 3 |
| Hs.23557  | SDCCAG10 | 1 | 0 | 0 | 0 | 1 | 0 | 3 |
| Hs.237691 | AOF1     | 1 | 0 | 0 | 0 | 1 | 0 | 3 |
| Hs.254406 | ABT1     | 1 | 0 | 0 | 0 | 1 | 0 | 3 |
| Hs.271640 | PPARA    | 1 | 0 | 0 | 0 | 1 | 0 | 3 |
| Hs.283734 | MRPL47   | 1 | 0 | 0 | 0 | 1 | 0 | 3 |
| Hs.29222  | ZNF76    | 1 | 0 | 0 | 0 | 1 | 0 | 3 |
| Hs.301904 | FLJ12671 | 1 | 0 | 0 | 0 | 1 | 0 | 3 |
| Hs.302498 | RAB40B   | 1 | 0 | 0 | 0 | 1 | 0 | 3 |
| Hs.320    | XPC      | 1 | 0 | 0 | 0 | 1 | 0 | 3 |
| Hs.334626 | MGC4238  | 1 | 0 | 0 | 0 | 1 | 0 | 3 |
| Hs.356769 | MAN2B1   | 1 | 0 | 0 | 0 | 1 | 0 | 3 |
| Hs.367854 | SKB1     | 1 | 0 | 0 | 0 | 1 | 0 | 3 |
| Hs.370771 | CDKN1A   | 1 | 0 | 0 | 0 | 1 | 0 | 3 |
| Hs.380159 | KIAA1393 | 1 | 0 | 0 | 0 | 1 | 0 | 3 |
| Hs.380875 | TEB4     | 1 | 0 | 0 | 0 | 1 | 0 | 3 |
| Hs.390171 | COL11A2  | 1 | 0 | 0 | 0 | 1 | 0 | 3 |
| Hs.406160 | CEL      | 1 | 0 | 0 | 0 | 1 | 0 | 3 |
| Hs.406631 | CDC27    | 1 | 0 | 0 | 0 | 1 | 0 | 3 |
| Hs.408161 | KIAA1465 | 1 | 0 | 0 | 0 | 1 | 0 | 3 |
| Hs.410692 | PER2     | 1 | 0 | 0 | 0 | 1 | 0 | 3 |
| Hs.415534 | C9orf83  | 1 | 0 | 0 | 0 | 1 | 0 | 3 |
| Hs.432398 | OXR1     | 1 | 0 | 0 | 0 | 1 | 0 | 3 |
| Hs.434081 | PSME2    | 1 | 0 | 0 | 0 | 1 | 0 | 3 |
| Hs.434993 | RBJ      | 1 | 0 | 0 | 0 | 1 | 0 | 3 |
| Hs.435767 | PCYT1A   | 1 | 0 | 0 | 0 | 1 | 0 | 3 |
| Hs.435947 | RBM15    | 1 | 0 | 0 | 0 | 1 | 0 | 3 |
| Hs.436885 | HRC      | 1 | 0 | 0 | 0 | 1 | 0 | 3 |
| Hs.438642 | FLJ36754 | 1 | 0 | 0 | 0 | 1 | 0 | 3 |
| Hs.446303 | NOS3     | 1 | 0 | 0 | 0 | 1 | 0 | 3 |
| Hs.458405 | POLDIP3  | 1 | 0 | 0 | 0 | 1 | 0 | 3 |
| Hs.49597  | RAI2     | 1 | 0 | 0 | 0 | 1 | 0 | 3 |
| Hs.497941 | 76P      | 1 | 0 | 0 | 0 | 1 | 0 | 3 |
| Hs.528639 | UBAP1    | 1 | 0 | 0 | 0 | 1 | 0 | 3 |
| Hs.74284  | MGC2714  | 1 | 0 | 0 | 0 | 1 | 0 | 3 |
| Hs.78921  | AKAP1    | 1 | 0 | 0 | 0 | 1 | 0 | 3 |
| Hs.79187  | CXADR    | 1 | 0 | 0 | 0 | 1 | 0 | 3 |
| Hs.7957   | ADAR     | 1 | 0 | 0 | 0 | 1 | 0 | 3 |
| Hs.8102   | RPS20    | 1 | 0 | 0 | 0 | 1 | 0 | 3 |
| Hs.82283  | MTR      | 1 | 0 | 0 | 0 | 1 | 0 | 3 |
| Hs.94672  | GCN5L1   | 1 | 0 | 0 | 0 | 1 | 0 | 3 |
| Hs.101337 | UCP3     | 1 | 0 | 0 | 0 | 0 | 1 | 4 |
| Hs.10283  | RBM8A    | 1 | 0 | 0 | 0 | 0 | 1 | 4 |
| Hs.102910 | VARS2L   | 1 | 0 | 0 | 0 | 0 | 1 | 4 |
| Hs.1050   | PSCD1    | 1 | 0 | 0 | 0 | 0 | 1 | 4 |
| Hs.105779 | PIASY    | 1 | 0 | 0 | 0 | 0 | 1 | 4 |

|           |          |   |   |   |   |   |   |   |
|-----------|----------|---|---|---|---|---|---|---|
| Hs.107476 | ATP5L    | 1 | 0 | 0 | 0 | 0 | 1 | 4 |
| Hs.1074   | SFTPC    | 1 | 0 | 0 | 0 | 0 | 1 | 4 |
| Hs.107776 | SUGT1    | 1 | 0 | 0 | 0 | 0 | 1 | 4 |
| Hs.109225 | VCAM1    | 1 | 0 | 0 | 0 | 0 | 1 | 4 |
| Hs.110675 | APOE     | 1 | 0 | 0 | 0 | 0 | 1 | 4 |
| Hs.111967 | SLC30A3  | 1 | 0 | 0 | 0 | 0 | 1 | 4 |
| Hs.111991 | SENP8    | 1 | 0 | 0 | 0 | 0 | 1 | 4 |
| Hs.113253 | PAX7     | 1 | 0 | 0 | 0 | 0 | 1 | 4 |
| Hs.1145   | WT1      | 1 | 0 | 0 | 0 | 0 | 1 | 4 |
| Hs.114765 | MLLT2    | 1 | 0 | 0 | 0 | 0 | 1 | 4 |
| Hs.116784 | TRIP4    | 1 | 0 | 0 | 0 | 0 | 1 | 4 |
| Hs.117176 | PABPN1   | 1 | 0 | 0 | 0 | 0 | 1 | 4 |
| Hs.1189   | E2F3     | 1 | 0 | 0 | 0 | 0 | 1 | 4 |
| Hs.123070 | HOXD10   | 1 | 0 | 0 | 0 | 0 | 1 | 4 |
| Hs.124010 | MGC20983 | 1 | 0 | 0 | 0 | 0 | 1 | 4 |
| Hs.124186 | RNF2     | 1 | 0 | 0 | 0 | 0 | 1 | 4 |
| Hs.125605 | UNC5C    | 1 | 0 | 0 | 0 | 0 | 1 | 4 |
| Hs.126378 | ABCG4    | 1 | 0 | 0 | 0 | 0 | 1 | 4 |
| Hs.126817 | TRALPUSH | 1 | 0 | 0 | 0 | 0 | 1 | 4 |
| Hs.127403 | FLJ32675 | 1 | 0 | 0 | 0 | 0 | 1 | 4 |
| Hs.127751 | DOK5     | 1 | 0 | 0 | 0 | 0 | 1 | 4 |
| Hs.12940  | ZHX1     | 1 | 0 | 0 | 0 | 0 | 1 | 4 |
| Hs.131823 | SPATA5   | 1 | 0 | 0 | 0 | 0 | 1 | 4 |
| Hs.131835 | RHBG     | 1 | 0 | 0 | 0 | 0 | 1 | 4 |
| Hs.132513 | HSD17B12 | 1 | 0 | 0 | 0 | 0 | 1 | 4 |
| Hs.1349   | CSF2     | 1 | 0 | 0 | 0 | 0 | 1 | 4 |
| Hs.135578 | CTBS     | 1 | 0 | 0 | 0 | 0 | 1 | 4 |
| Hs.135756 | POLK     | 1 | 0 | 0 | 0 | 0 | 1 | 4 |
| Hs.137418 | ABCC9    | 1 | 0 | 0 | 0 | 0 | 1 | 4 |
| Hs.141347 | MGC33864 | 1 | 0 | 0 | 0 | 0 | 1 | 4 |
| Hs.143323 | JARID1B  | 1 | 0 | 0 | 0 | 0 | 1 | 4 |
| Hs.14512  | TRIM44   | 1 | 0 | 0 | 0 | 0 | 1 | 4 |
| Hs.148101 | CDC42EP1 | 1 | 0 | 0 | 0 | 0 | 1 | 4 |
| Hs.148496 | MAK      | 1 | 0 | 0 | 0 | 0 | 1 | 4 |
| Hs.149098 | SMTN     | 1 | 0 | 0 | 0 | 0 | 1 | 4 |
| Hs.149504 | WNT9A    | 1 | 0 | 0 | 0 | 0 | 1 | 4 |
| Hs.150406 | ZFP37    | 1 | 0 | 0 | 0 | 0 | 1 | 4 |
| Hs.150744 | INVS     | 1 | 0 | 0 | 0 | 0 | 1 | 4 |
| Hs.154023 | TXNDC4   | 1 | 0 | 0 | 0 | 0 | 1 | 4 |
| Hs.155482 | HAGH     | 1 | 0 | 0 | 0 | 0 | 1 | 4 |
| Hs.15725  | IER5     | 1 | 0 | 0 | 0 | 0 | 1 | 4 |
| Hs.1578   | BIRC5    | 1 | 0 | 0 | 0 | 0 | 1 | 4 |
| Hs.158195 | HSF2     | 1 | 0 | 0 | 0 | 0 | 1 | 4 |
| Hs.158213 | SPAG6    | 1 | 0 | 0 | 0 | 0 | 1 | 4 |
| Hs.159360 | PTGER1   | 1 | 0 | 0 | 0 | 0 | 1 | 4 |
| Hs.159609 | IRS4     | 1 | 0 | 0 | 0 | 0 | 1 | 4 |
| Hs.15977  | NDUFB9   | 1 | 0 | 0 | 0 | 0 | 1 | 4 |

|           |               |   |   |   |   |   |   |   |
|-----------|---------------|---|---|---|---|---|---|---|
| Hs.1600   | CCT5          | 1 | 0 | 0 | 0 | 0 | 1 | 4 |
| Hs.166071 | CDK5          | 1 | 0 | 0 | 0 | 0 | 1 | 4 |
| Hs.169476 | GAPD          | 1 | 0 | 0 | 0 | 0 | 1 | 4 |
| Hs.170472 | TPR           | 1 | 0 | 0 | 0 | 0 | 1 | 4 |
| Hs.172870 | KIAA1913      | 1 | 0 | 0 | 0 | 0 | 1 | 4 |
| Hs.17428  | ARID4B        | 1 | 0 | 0 | 0 | 0 | 1 | 4 |
| Hs.1742   | IQGAP1        | 1 | 0 | 0 | 0 | 0 | 1 | 4 |
| Hs.17883  | PPM1G         | 1 | 0 | 0 | 0 | 0 | 1 | 4 |
| Hs.179735 | MGC19531      | 1 | 0 | 0 | 0 | 0 | 1 | 4 |
| Hs.181244 | HLA-A         | 1 | 0 | 0 | 0 | 0 | 1 | 4 |
| Hs.182626 | C22orf5       | 1 | 0 | 0 | 0 | 0 | 1 | 4 |
| Hs.182825 | RPL35         | 1 | 0 | 0 | 0 | 0 | 1 | 4 |
| Hs.187416 | CLTC          | 1 | 0 | 0 | 0 | 0 | 1 | 4 |
| Hs.190043 | MOSPD2        | 1 | 0 | 0 | 0 | 0 | 1 | 4 |
| Hs.191381 | MGC12197      | 1 | 0 | 0 | 0 | 0 | 1 | 4 |
| Hs.191762 | NOXO1         | 1 | 0 | 0 | 0 | 0 | 1 | 4 |
| Hs.194684 | BSN           | 1 | 0 | 0 | 0 | 0 | 1 | 4 |
| Hs.194714 | SNAP29        | 1 | 0 | 0 | 0 | 0 | 1 | 4 |
| Hs.198281 | PKM2          | 1 | 0 | 0 | 0 | 0 | 1 | 4 |
| Hs.20159  | COQ4          | 1 | 0 | 0 | 0 | 0 | 1 | 4 |
| Hs.2025   | TGFB3         | 1 | 0 | 0 | 0 | 0 | 1 | 4 |
| Hs.2062   | VDR           | 1 | 0 | 0 | 0 | 0 | 1 | 4 |
| Hs.208641 | ACTA2         | 1 | 0 | 0 | 0 | 0 | 1 | 4 |
| Hs.210367 | SFRS2IP       | 1 | 0 | 0 | 0 | 0 | 1 | 4 |
| Hs.212507 | MGST3         | 1 | 0 | 0 | 0 | 0 | 1 | 4 |
| Hs.21276  | COL4A3BP      | 1 | 0 | 0 | 0 | 0 | 1 | 4 |
| Hs.21635  | TUBG1         | 1 | 0 | 0 | 0 | 0 | 1 | 4 |
| Hs.22678  | PEO1          | 1 | 0 | 0 | 0 | 0 | 1 | 4 |
| Hs.2314   | MBL2          | 1 | 0 | 0 | 0 | 0 | 1 | 4 |
| Hs.235935 | NOV           | 1 | 0 | 0 | 0 | 0 | 1 | 4 |
| Hs.237506 | DNAJB5        | 1 | 0 | 0 | 0 | 0 | 1 | 4 |
| Hs.238513 | C7orf21       | 1 | 0 | 0 | 0 | 0 | 1 | 4 |
| Hs.240770 | NCBP2         | 1 | 0 | 0 | 0 | 0 | 1 | 4 |
| Hs.244376 | FLJ39630      | 1 | 0 | 0 | 0 | 0 | 1 | 4 |
| Hs.24529  | CHEK1         | 1 | 0 | 0 | 0 | 0 | 1 | 4 |
| Hs.24553  | FLJ12541      | 1 | 0 | 0 | 0 | 0 | 1 | 4 |
| Hs.247700 | FOXP3         | 1 | 0 | 0 | 0 | 0 | 1 | 4 |
| Hs.248153 | OMP           | 1 | 0 | 0 | 0 | 0 | 1 | 4 |
| Hs.24979  | DKFZp761P1010 | 1 | 0 | 0 | 0 | 0 | 1 | 4 |
| Hs.250429 | SUPT6H        | 1 | 0 | 0 | 0 | 0 | 1 | 4 |
| Hs.250905 | LOC51234      | 1 | 0 | 0 | 0 | 0 | 1 | 4 |
| Hs.25274  | C11ORF4       | 1 | 0 | 0 | 0 | 0 | 1 | 4 |
| Hs.25292  | JUNB          | 1 | 0 | 0 | 0 | 0 | 1 | 4 |
| Hs.253067 | MAEA          | 1 | 0 | 0 | 0 | 0 | 1 | 4 |
| Hs.25391  | PI16          | 1 | 0 | 0 | 0 | 0 | 1 | 4 |
| Hs.25647  | FOS           | 1 | 0 | 0 | 0 | 0 | 1 | 4 |
| Hs.257111 | MGC3265       | 1 | 0 | 0 | 0 | 0 | 1 | 4 |

|           |               |   |   |   |   |   |   |   |
|-----------|---------------|---|---|---|---|---|---|---|
| Hs.26009  | UBCE7IP5      | 1 | 0 | 0 | 0 | 0 | 1 | 4 |
| Hs.26058  | FLJ21156      | 1 | 0 | 0 | 0 | 0 | 1 | 4 |
| Hs.26776  | NTRK3         | 1 | 0 | 0 | 0 | 0 | 1 | 4 |
| Hs.26813  | PTX1          | 1 | 0 | 0 | 0 | 0 | 1 | 4 |
| Hs.269878 | HADHB         | 1 | 0 | 0 | 0 | 0 | 1 | 4 |
| Hs.271225 | SUPT16H       | 1 | 0 | 0 | 0 | 0 | 1 | 4 |
| Hs.27184  | GFER          | 1 | 0 | 0 | 0 | 0 | 1 | 4 |
| Hs.271977 | EN1           | 1 | 0 | 0 | 0 | 0 | 1 | 4 |
| Hs.27335  | SRR           | 1 | 0 | 0 | 0 | 0 | 1 | 4 |
| Hs.274122 | EPB49         | 1 | 0 | 0 | 0 | 0 | 1 | 4 |
| Hs.274428 | TERF2IP       | 1 | 0 | 0 | 0 | 0 | 1 | 4 |
| Hs.279704 | CHRAC1        | 1 | 0 | 0 | 0 | 0 | 1 | 4 |
| Hs.283565 | FOSL1         | 1 | 0 | 0 | 0 | 0 | 1 | 4 |
| Hs.283739 | C1orf6        | 1 | 0 | 0 | 0 | 0 | 1 | 4 |
| Hs.283922 | OPN4          | 1 | 0 | 0 | 0 | 0 | 1 | 4 |
| Hs.284296 | SURF4         | 1 | 0 | 0 | 0 | 0 | 1 | 4 |
| Hs.285218 | PCTP          | 1 | 0 | 0 | 0 | 0 | 1 | 4 |
| Hs.28608  | C20orf99      | 1 | 0 | 0 | 0 | 0 | 1 | 4 |
| Hs.29203  | GBL           | 1 | 0 | 0 | 0 | 0 | 1 | 4 |
| Hs.297304 | AD-017        | 1 | 0 | 0 | 0 | 0 | 1 | 4 |
| Hs.297681 | SERPINA1      | 1 | 0 | 0 | 0 | 0 | 1 | 4 |
| Hs.2985   | EMD           | 1 | 0 | 0 | 0 | 0 | 1 | 4 |
| Hs.298735 | FNBP3         | 1 | 0 | 0 | 0 | 0 | 1 | 4 |
| Hs.301853 | RAB34         | 1 | 0 | 0 | 0 | 0 | 1 | 4 |
| Hs.303090 | PPP1R3C       | 1 | 0 | 0 | 0 | 0 | 1 | 4 |
| Hs.303899 | MGC5509       | 1 | 0 | 0 | 0 | 0 | 1 | 4 |
| Hs.3100   | KARS          | 1 | 0 | 0 | 0 | 0 | 1 | 4 |
| Hs.312419 | ORC3L         | 1 | 0 | 0 | 0 | 0 | 1 | 4 |
| Hs.313227 | CHRNE         | 1 | 0 | 0 | 0 | 0 | 1 | 4 |
| Hs.315137 | AARS          | 1 | 0 | 0 | 0 | 0 | 1 | 4 |
| Hs.31731  | PRDX5         | 1 | 0 | 0 | 0 | 0 | 1 | 4 |
| Hs.3210   | REN           | 1 | 0 | 0 | 0 | 0 | 1 | 4 |
| Hs.321535 | HRD1          | 1 | 0 | 0 | 0 | 0 | 1 | 4 |
| Hs.322482 | DKFZP566J2046 | 1 | 0 | 0 | 0 | 0 | 1 | 4 |
| Hs.323032 | SIL           | 1 | 0 | 0 | 0 | 0 | 1 | 4 |
| Hs.323363 | FLJ22169      | 1 | 0 | 0 | 0 | 0 | 1 | 4 |
| Hs.323715 | MAT1A         | 1 | 0 | 0 | 0 | 0 | 1 | 4 |
| Hs.326725 | FLJ22624      | 1 | 0 | 0 | 0 | 0 | 1 | 4 |
| Hs.32916  | NACA          | 1 | 0 | 0 | 0 | 0 | 1 | 4 |
| Hs.329817 | PDHX          | 1 | 0 | 0 | 0 | 0 | 1 | 4 |
| Hs.33286  | IGHMBP2       | 1 | 0 | 0 | 0 | 0 | 1 | 4 |
| Hs.333579 | HSPC152       | 1 | 0 | 0 | 0 | 0 | 1 | 4 |
| Hs.335051 | GRIA2         | 1 | 0 | 0 | 0 | 0 | 1 | 4 |
| Hs.337588 | LEAP-2        | 1 | 0 | 0 | 0 | 0 | 1 | 4 |
| Hs.337774 | ARHGEF2       | 1 | 0 | 0 | 0 | 0 | 1 | 4 |
| Hs.343586 | ZFP36         | 1 | 0 | 0 | 0 | 0 | 1 | 4 |
| Hs.347340 | RBPSUH        | 1 | 0 | 0 | 0 | 0 | 1 | 4 |



|           |           |   |   |   |   |   |   |   |
|-----------|-----------|---|---|---|---|---|---|---|
| Hs.349088 | SLC1A2    | 1 | 0 | 0 | 0 | 0 | 1 | 4 |
| Hs.351629 | MAPBPIP   | 1 | 0 | 0 | 0 | 0 | 1 | 4 |
| Hs.35199  | STXBP4    | 1 | 0 | 0 | 0 | 0 | 1 | 4 |
| Hs.352768 | PSMB1     | 1 | 0 | 0 | 0 | 0 | 1 | 4 |
| Hs.3548   | MTCP1     | 1 | 0 | 0 | 0 | 0 | 1 | 4 |
| Hs.356181 | CAPN1     | 1 | 0 | 0 | 0 | 0 | 1 | 4 |
| Hs.356223 | C12orf14  | 1 | 0 | 0 | 0 | 0 | 1 | 4 |
| Hs.356572 | RPS3A     | 1 | 0 | 0 | 0 | 0 | 1 | 4 |
| Hs.368657 | DLL1      | 1 | 0 | 0 | 0 | 0 | 1 | 4 |
| Hs.369879 | EVX1      | 1 | 0 | 0 | 0 | 0 | 1 | 4 |
| Hs.373575 | APAF1     | 1 | 0 | 0 | 0 | 0 | 1 | 4 |
| Hs.373627 | KIF9      | 1 | 0 | 0 | 0 | 0 | 1 | 4 |
| Hs.377484 | BAG1      | 1 | 0 | 0 | 0 | 0 | 1 | 4 |
| Hs.380253 | MRPL21    | 1 | 0 | 0 | 0 | 0 | 1 | 4 |
| Hs.380764 | PPP2R2B   | 1 | 0 | 0 | 0 | 0 | 1 | 4 |
| Hs.380852 | LOC254359 | 1 | 0 | 0 | 0 | 0 | 1 | 4 |
| Hs.381050 | B3GAT1    | 1 | 0 | 0 | 0 | 0 | 1 | 4 |
| Hs.384598 | SERPING1  | 1 | 0 | 0 | 0 | 0 | 1 | 4 |
| Hs.387804 | PABPC1    | 1 | 0 | 0 | 0 | 0 | 1 | 4 |
| Hs.389263 | SENP1     | 1 | 0 | 0 | 0 | 0 | 1 | 4 |
| Hs.390242 | IRS1      | 1 | 0 | 0 | 0 | 0 | 1 | 4 |
| Hs.396783 | SLC9A3R1  | 1 | 0 | 0 | 0 | 0 | 1 | 4 |
| Hs.397010 | AYP1      | 1 | 0 | 0 | 0 | 0 | 1 | 4 |
| Hs.397153 | LOC126208 | 1 | 0 | 0 | 0 | 0 | 1 | 4 |
| Hs.406074 | PAWR      | 1 | 0 | 0 | 0 | 0 | 1 | 4 |
| Hs.406684 | SCN7A     | 1 | 0 | 0 | 0 | 0 | 1 | 4 |
| Hs.406687 | TSHB      | 1 | 0 | 0 | 0 | 0 | 1 | 4 |
| Hs.409065 | FEN1      | 1 | 0 | 0 | 0 | 0 | 1 | 4 |
| Hs.409875 | SLC40A1   | 1 | 0 | 0 | 0 | 0 | 1 | 4 |
| Hs.410037 | CTGF      | 1 | 0 | 0 | 0 | 0 | 1 | 4 |
| Hs.410092 | KIAA0652  | 1 | 0 | 0 | 0 | 0 | 1 | 4 |
| Hs.410668 | ESM1      | 1 | 0 | 0 | 0 | 0 | 1 | 4 |
| Hs.411958 | HLA-F     | 1 | 0 | 0 | 0 | 0 | 1 | 4 |
| Hs.412941 | PADI1     | 1 | 0 | 0 | 0 | 0 | 1 | 4 |
| Hs.412957 | COP1      | 1 | 0 | 0 | 0 | 0 | 1 | 4 |
| Hs.413557 | ASPH      | 1 | 0 | 0 | 0 | 0 | 1 | 4 |
| Hs.416032 | TSGA10    | 1 | 0 | 0 | 0 | 0 | 1 | 4 |
| Hs.418083 | RBP4      | 1 | 0 | 0 | 0 | 0 | 1 | 4 |
| Hs.422889 | NUDT6     | 1 | 0 | 0 | 0 | 0 | 1 | 4 |
| Hs.429437 | PCSK1N    | 1 | 0 | 0 | 0 | 0 | 1 | 4 |
| Hs.430541 | SON       | 1 | 0 | 0 | 0 | 0 | 1 | 4 |
| Hs.432443 | EHHADH    | 1 | 0 | 0 | 0 | 0 | 1 | 4 |
| Hs.432653 | IBRDC2    | 1 | 0 | 0 | 0 | 0 | 1 | 4 |
| Hs.432690 | SLC39A9   | 1 | 0 | 0 | 0 | 0 | 1 | 4 |
| Hs.432850 | LOC162427 | 1 | 0 | 0 | 0 | 0 | 1 | 4 |
| Hs.432918 | RARSL     | 1 | 0 | 0 | 0 | 0 | 1 | 4 |
| Hs.433319 | CTF1      | 1 | 0 | 0 | 0 | 0 | 1 | 4 |

|           |               |   |   |   |   |   |   |   |
|-----------|---------------|---|---|---|---|---|---|---|
| Hs.433529 | RPS11         | 1 | 0 | 0 | 0 | 0 | 1 | 4 |
| Hs.433673 | MFN1          | 1 | 0 | 0 | 0 | 0 | 1 | 4 |
| Hs.433753 | SYNGR2        | 1 | 0 | 0 | 0 | 0 | 1 | 4 |
| Hs.433986 | PREP          | 1 | 0 | 0 | 0 | 0 | 1 | 4 |
| Hs.434931 | NPHP4         | 1 | 0 | 0 | 0 | 0 | 1 | 4 |
| Hs.435675 | CPSF2         | 1 | 0 | 0 | 0 | 0 | 1 | 4 |
| Hs.436937 | CLASP1        | 1 | 0 | 0 | 0 | 0 | 1 | 4 |
| Hs.437779 | C11orf10      | 1 | 0 | 0 | 0 | 0 | 1 | 4 |
| Hs.438838 | TAF7          | 1 | 0 | 0 | 0 | 0 | 1 | 4 |
| Hs.439671 | NBL1          | 1 | 0 | 0 | 0 | 0 | 1 | 4 |
| Hs.439683 | KPNB1         | 1 | 0 | 0 | 0 | 0 | 1 | 4 |
| Hs.440760 | STAR          | 1 | 0 | 0 | 0 | 0 | 1 | 4 |
| Hs.440961 | CAST          | 1 | 0 | 0 | 0 | 0 | 1 | 4 |
| Hs.441717 | MGC15763      | 1 | 0 | 0 | 0 | 0 | 1 | 4 |
| Hs.444354 | FBXW2         | 1 | 0 | 0 | 0 | 0 | 1 | 4 |
| Hs.444982 | ALS2CR8       | 1 | 0 | 0 | 0 | 0 | 1 | 4 |
| Hs.445037 | ACTN3         | 1 | 0 | 0 | 0 | 0 | 1 | 4 |
| Hs.446350 | TGFBRAP1      | 1 | 0 | 0 | 0 | 0 | 1 | 4 |
| Hs.446551 | MEP50         | 1 | 0 | 0 | 0 | 0 | 1 | 4 |
| Hs.446658 | AF5Q31        | 1 | 0 | 0 | 0 | 0 | 1 | 4 |
| Hs.447794 | MMRP19        | 1 | 0 | 0 | 0 | 0 | 1 | 4 |
| Hs.46038  | SCN4A         | 1 | 0 | 0 | 0 | 0 | 1 | 4 |
| Hs.46465  | TCIRG1        | 1 | 0 | 0 | 0 | 0 | 1 | 4 |
| Hs.46903  | MANEA         | 1 | 0 | 0 | 0 | 0 | 1 | 4 |
| Hs.479888 | NEGR1         | 1 | 0 | 0 | 0 | 0 | 1 | 4 |
| Hs.480368 | EIF2S3        | 1 | 0 | 0 | 0 | 0 | 1 | 4 |
| Hs.48554  | RAP2A         | 1 | 0 | 0 | 0 | 0 | 1 | 4 |
| Hs.48855  | CDCA8         | 1 | 0 | 0 | 0 | 0 | 1 | 4 |
| Hs.49349  | BACE          | 1 | 0 | 0 | 0 | 0 | 1 | 4 |
| Hs.49421  | FLJ23129      | 1 | 0 | 0 | 0 | 0 | 1 | 4 |
| Hs.498154 | SNX1          | 1 | 0 | 0 | 0 | 0 | 1 | 4 |
| Hs.50252  | MRPL32        | 1 | 0 | 0 | 0 | 0 | 1 | 4 |
| Hs.50905  | CDKL5         | 1 | 0 | 0 | 0 | 0 | 1 | 4 |
| Hs.511752 | MXD4          | 1 | 0 | 0 | 0 | 0 | 1 | 4 |
| Hs.511979 | DKFZP434B0335 | 1 | 0 | 0 | 0 | 0 | 1 | 4 |
| Hs.512226 | IGFBP5        | 1 | 0 | 0 | 0 | 0 | 1 | 4 |
| Hs.512234 | IL6           | 1 | 0 | 0 | 0 | 0 | 1 | 4 |
| Hs.512330 | LOC374920     | 1 | 0 | 0 | 0 | 0 | 1 | 4 |
| Hs.512640 | PRKCSH        | 1 | 0 | 0 | 0 | 0 | 1 | 4 |
| Hs.512699 | SLC8A3        | 1 | 0 | 0 | 0 | 0 | 1 | 4 |
| Hs.512701 | SPG4          | 1 | 0 | 0 | 0 | 0 | 1 | 4 |
| Hs.512709 | TNNI3         | 1 | 0 | 0 | 0 | 0 | 1 | 4 |
| Hs.526401 | TCEB3BP1      | 1 | 0 | 0 | 0 | 0 | 1 | 4 |
| Hs.528386 | HOXA2         | 1 | 0 | 0 | 0 | 0 | 1 | 4 |
| Hs.528674 | TCF1          | 1 | 0 | 0 | 0 | 0 | 1 | 4 |
| Hs.54680  | LOC148523     | 1 | 0 | 0 | 0 | 0 | 1 | 4 |
| Hs.55498  | GGPS1         | 1 | 0 | 0 | 0 | 0 | 1 | 4 |

|          |               |   |   |   |   |   |   |   |
|----------|---------------|---|---|---|---|---|---|---|
| Hs.56175 | LOC92346      | 1 | 0 | 0 | 0 | 0 | 1 | 4 |
| Hs.56294 | RAB33A        | 1 | 0 | 0 | 0 | 0 | 1 | 4 |
| Hs.5683  | DHX15         | 1 | 0 | 0 | 0 | 0 | 1 | 4 |
| Hs.6196  | ILK           | 1 | 0 | 0 | 0 | 0 | 1 | 4 |
| Hs.6314  | PSK-1         | 1 | 0 | 0 | 0 | 0 | 1 | 4 |
| Hs.64616 | TMEM16B       | 1 | 0 | 0 | 0 | 0 | 1 | 4 |
| Hs.66    | IL1RL1        | 1 | 0 | 0 | 0 | 0 | 1 | 4 |
| Hs.67991 | DKFZp434G0522 | 1 | 0 | 0 | 0 | 0 | 1 | 4 |
| Hs.68061 | SPHK1         | 1 | 0 | 0 | 0 | 0 | 1 | 4 |
| Hs.6856  | ASH2L         | 1 | 0 | 0 | 0 | 0 | 1 | 4 |
| Hs.6891  | SFRS6         | 1 | 0 | 0 | 0 | 0 | 1 | 4 |
| Hs.6906  | RALA          | 1 | 0 | 0 | 0 | 0 | 1 | 4 |
| Hs.69360 | KIF2C         | 1 | 0 | 0 | 0 | 0 | 1 | 4 |
| Hs.69594 | HMG20A        | 1 | 0 | 0 | 0 | 0 | 1 | 4 |
| Hs.69771 | BF            | 1 | 0 | 0 | 0 | 0 | 1 | 4 |
| Hs.71573 | FLJ10074      | 1 | 0 | 0 | 0 | 0 | 1 | 4 |
| Hs.73291 | WDR12         | 1 | 0 | 0 | 0 | 0 | 1 | 4 |
| Hs.74034 | CAV1          | 1 | 0 | 0 | 0 | 0 | 1 | 4 |
| Hs.74563 | OAZ2          | 1 | 0 | 0 | 0 | 0 | 1 | 4 |
| Hs.75375 | MDH1          | 1 | 0 | 0 | 0 | 0 | 1 | 4 |
| Hs.75667 | SYP           | 1 | 0 | 0 | 0 | 0 | 1 | 4 |
| Hs.75678 | FOSB          | 1 | 0 | 0 | 0 | 0 | 1 | 4 |
| Hs.75823 | AF1Q          | 1 | 0 | 0 | 0 | 0 | 1 | 4 |
| Hs.75850 | WASF1         | 1 | 0 | 0 | 0 | 0 | 1 | 4 |
| Hs.75860 | HADHA         | 1 | 0 | 0 | 0 | 0 | 1 | 4 |
| Hs.76038 | IDI1          | 1 | 0 | 0 | 0 | 0 | 1 | 4 |
| Hs.76067 | HSPB1         | 1 | 0 | 0 | 0 | 0 | 1 | 4 |
| Hs.76366 | BAD           | 1 | 0 | 0 | 0 | 0 | 1 | 4 |
| Hs.76853 | DNAJA4        | 1 | 0 | 0 | 0 | 0 | 1 | 4 |
| Hs.7736  | MRPL27        | 1 | 0 | 0 | 0 | 0 | 1 | 4 |
| Hs.77439 | PRKAR2B       | 1 | 0 | 0 | 0 | 0 | 1 | 4 |
| Hs.77798 | HARS          | 1 | 0 | 0 | 0 | 0 | 1 | 4 |
| Hs.78563 | UBE2G1        | 1 | 0 | 0 | 0 | 0 | 1 | 4 |
| Hs.79170 | TTC9          | 1 | 0 | 0 | 0 | 0 | 1 | 4 |
| Hs.80288 | HSPA1L        | 1 | 0 | 0 | 0 | 0 | 1 | 4 |
| Hs.81424 | UBL1          | 1 | 0 | 0 | 0 | 0 | 1 | 4 |
| Hs.81634 | ATP5F1        | 1 | 0 | 0 | 0 | 0 | 1 | 4 |
| Hs.821   | BGN           | 1 | 0 | 0 | 0 | 0 | 1 | 4 |
| Hs.82285 | GART          | 1 | 0 | 0 | 0 | 0 | 1 | 4 |
| Hs.82327 | GSS           | 1 | 0 | 0 | 0 | 0 | 1 | 4 |
| Hs.82548 | MADD          | 1 | 0 | 0 | 0 | 0 | 1 | 4 |
| Hs.82961 | TFF3          | 1 | 0 | 0 | 0 | 0 | 1 | 4 |
| Hs.83126 | TAF11         | 1 | 0 | 0 | 0 | 0 | 1 | 4 |
| Hs.83583 | ARPC2         | 1 | 0 | 0 | 0 | 0 | 1 | 4 |
| Hs.83765 | DHFR          | 1 | 0 | 0 | 0 | 0 | 1 | 4 |
| Hs.84728 | KLF5          | 1 | 0 | 0 | 0 | 0 | 1 | 4 |
| Hs.84928 | NFYB          | 1 | 0 | 0 | 0 | 0 | 1 | 4 |

|          |               |   |   |   |   |   |   |   |
|----------|---------------|---|---|---|---|---|---|---|
| Hs.85658 | FLJ23436      | 1 | 0 | 0 | 0 | 0 | 1 | 4 |
| Hs.86724 | GCH1          | 1 | 0 | 0 | 0 | 0 | 1 | 4 |
| Hs.88594 | DKFZp762C1112 | 1 | 0 | 0 | 0 | 0 | 1 | 4 |
| Hs.89418 | PTGFR         | 1 | 0 | 0 | 0 | 0 | 1 | 4 |
| Hs.89640 | TEK           | 1 | 0 | 0 | 0 | 0 | 1 | 4 |
| Hs.89764 | FMR1          | 1 | 0 | 0 | 0 | 0 | 1 | 4 |
| Hs.91161 | PFDN4         | 1 | 0 | 0 | 0 | 0 | 1 | 4 |
| Hs.95577 | CDK4          | 1 | 0 | 0 | 0 | 0 | 1 | 4 |
| Hs.9568  | ZNF261        | 1 | 0 | 0 | 0 | 0 | 1 | 4 |
| Hs.97124 | PWWP1         | 1 | 0 | 0 | 0 | 0 | 1 | 4 |
| Hs.9825  | CGI-128       | 1 | 0 | 0 | 0 | 0 | 1 | 4 |
| Hs.992   | PLA2G1B       | 1 | 0 | 0 | 0 | 0 | 1 | 4 |
| Hs.99348 | DLX5          | 1 | 0 | 0 | 0 | 0 | 1 | 4 |
