# Supplementary material
Source: PubMed Central journal article supplement (PMC545447)

## Supplementary figure 1

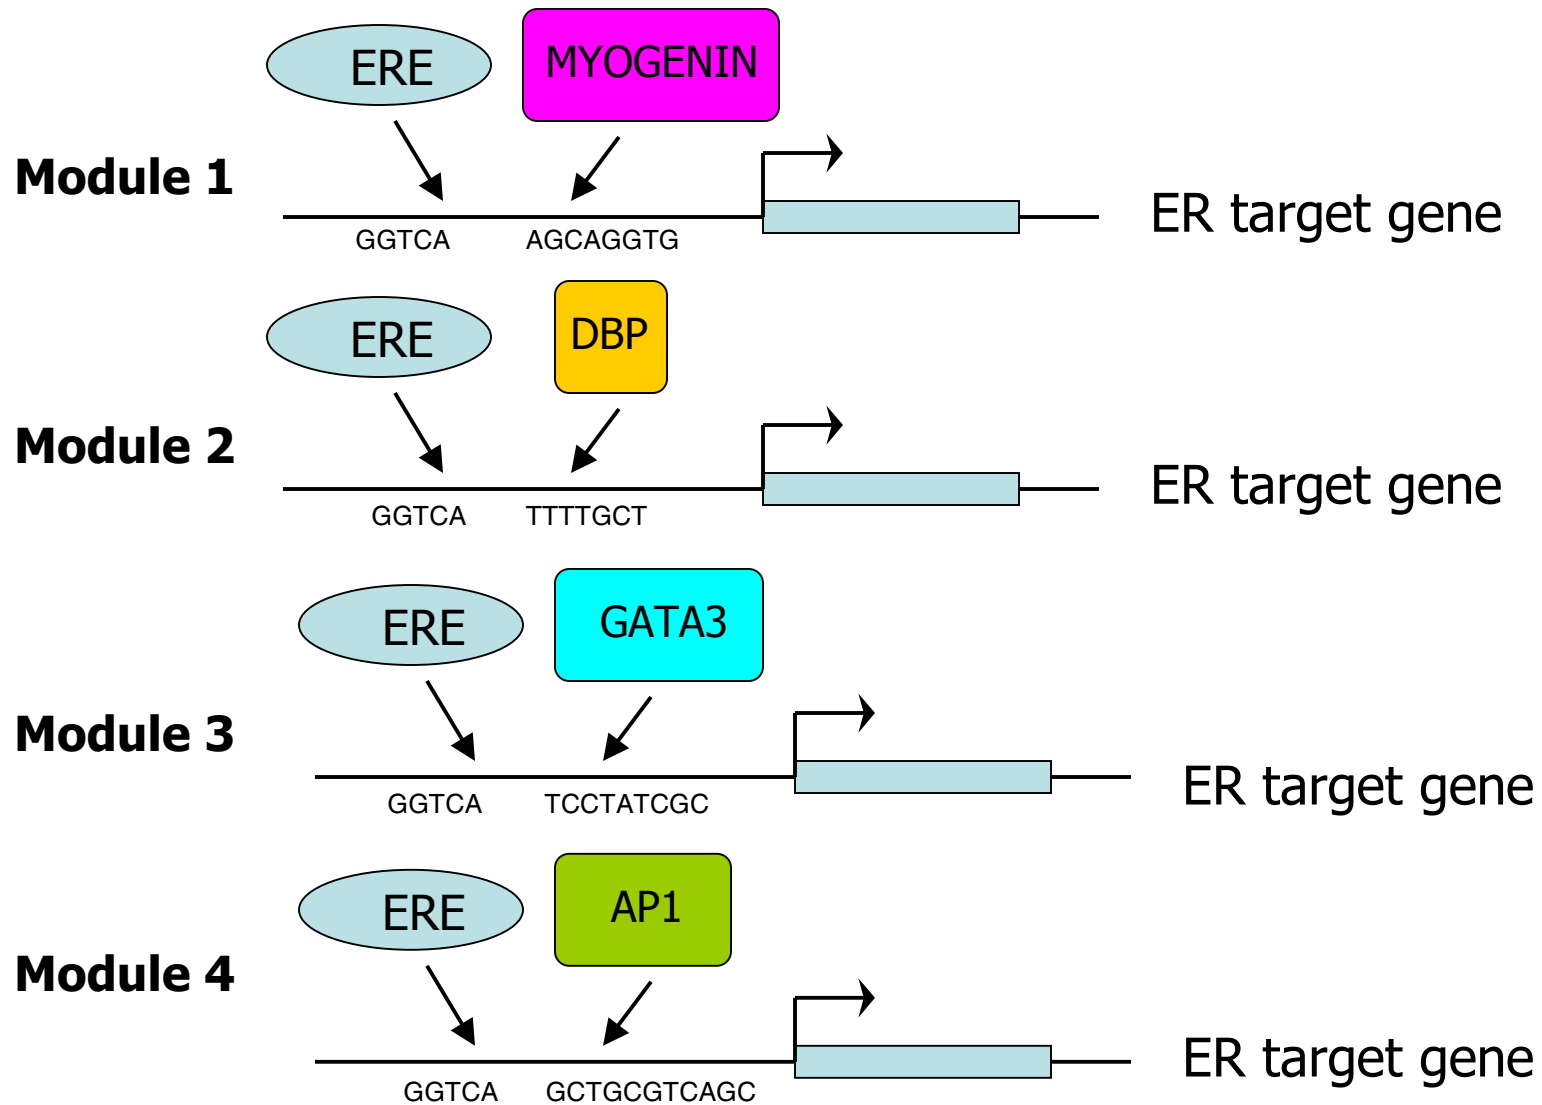

Supplement: nar_32_22_6627__1.pdf [file nar_32_22_6627__1.pdf]
